# Supplementary material for: MIPAS ozone retrieval version 8: middle atmosphere measurements
Source: Copernicus journal article supplement (doi:10.5194/amt-2023-118), 2023-06-16
Supplement: Supplementary file 1 [file amt-2023-118-supplement.pdf]

*Supplement of*  
**MIPAS O<sub>3</sub> retrieval version 8: middle and upper atmosphere  
measurements**

Manuel López-Puertas et al.

**Correspondence:** Manuel López-Puertas (puertas@iaa.es)

This document serves as a reference for the definitions of the representative atmospheres used for the calculation of the middle atmosphere (MA) and upper atmosphere (UA) measurement modes ozone error budgets. The representative atmospheric conditions are listed in Tables S1 and S36. This document also collects the respective error budgets of both modes, which are listed in Tables S2–S35 for the MA data and in Tables S37–S70 for the UA data. The errors are also depicted in figures S1–S34  
5 for the MA data and in figures S35–S68 for the UA data.

The errors are given as relative values in percentage, even if they are of additive nature, i.e., do not scale with the retrieved volume mixing ratio. They were calculated with respect to the average ozone profile calculated from the single geolocations contributing to the respective representative atmospheres.

**S1 Errors budget for O<sub>3</sub> MA data**

10 In this section we provide the errors for the MA data.

**Table S1.** Labels and definitions of the representative atmospheric conditions which were used to calculate the error budget for MA data.

| representative atmosphere label   | month(s) used | latitude range | solar zenith angle range |
|-----------------------------------|---------------|----------------|--------------------------|
| Northern polar winter day         | Jan, Feb      | 65°N – 90°N    | < 90°                    |
| Northern polar winter night       | Jan, Feb      | 65°N – 90°N    | > 98°                    |
| Northern polar spring day         | Apr           | 65°N – 90°N    | < 90°                    |
| Northern polar spring night       | Apr           | 65°N – 90°N    | > 98°                    |
| Northern polar summer day         | Jul, Aug      | 65°N – 90°N    | < 90°                    |
| Northern polar summer night       | Jul, Aug      | 65°N – 90°N    | > 98°                    |
| Northern polar autumn day         | Oct           | 65°N – 90°N    | < 90°                    |
| Northern polar autumn night       | Oct           | 65°N – 90°N    | > 98°                    |
| Northern midlatitude winter day   | Jan, Feb      | 40°N – 60°N    | < 90°                    |
| Northern midlatitude winter night | Jan, Feb      | 40°N – 60°N    | > 98°                    |
| Northern midlatitude spring day   | Apr           | 40°N – 60°N    | < 90°                    |
| Northern midlatitude spring night | Apr           | 40°N – 60°N    | > 98°                    |
| Northern midlatitude summer day   | Jul, Aug      | 40°N – 60°N    | < 90°                    |
| Northern midlatitude summer night | Jul, Aug      | 40°N – 60°N    | > 98°                    |
| Northern midlatitude autumn day   | Oct           | 40°N – 60°N    | < 90°                    |
| Northern midlatitude autumn night | Oct           | 40°N – 60°N    | > 98°                    |
| Tropics day                       | Apr           | 20°S – 20°N    | < 90°                    |
| Tropics night                     | Apr           | 20°S – 20°N    | > 98°                    |
| Southern midlatitude winter day   | Jul, Aug      | 40°S – 60°S    | < 90°                    |
| Southern midlatitude winter night | Jul, Aug      | 40°S – 60°S    | > 98°                    |
| Southern midlatitude spring day   | Oct           | 40°S – 60°S    | < 90°                    |
| Southern midlatitude spring night | Oct           | 40°S – 60°S    | > 98°                    |
| Southern midlatitude summer day   | Jan, Feb      | 40°S – 60°S    | < 90°                    |
| Southern midlatitude summer night | Jan, Feb      | 40°S – 60°S    | > 98°                    |
| Southern midlatitude autumn day   | Apr           | 40°S – 60°S    | < 90°                    |
| Southern midlatitude autumn night | Apr           | 40°S – 60°S    | > 98°                    |
| Southern polar winter day         | Jul, Aug      | 65°S – 90°S    | < 90°                    |
| Southern polar winter night       | Jul, Aug      | 65°S – 90°S    | > 98°                    |
| Southern polar spring day         | Oct           | 65°S – 90°S    | < 90°                    |
| Southern polar spring night       | Oct           | 65°S – 90°S    | > 98°                    |
| Southern polar summer day         | Jan, Feb      | 65°S – 90°S    | < 90°                    |
| Southern polar summer night       | Jan, Feb      | 65°S – 90°S    | > 98°                    |
| Southern polar autumn day         | Apr           | 65°S – 90°S    | < 90°                    |
| Southern polar autumn night       | Apr           | 65°S – 90°S    | > 98°                    |

**Table S2.** Ozone error budget for Northern polar winter day, MA. All uncertainties are  $1\sigma$ .

| altitude<br>(km) | mean O <sub>3</sub> vmr<br>(ppmv) | NLTE<br>(%) | interf<br>(%) | ILS<br>(%) | offset<br>(%) | gain<br>(%) | spectro<br>(%) | T+LOS<br>(%) | noise<br>(%) | random<br>(%) | syst<br>(%) |
|------------------|-----------------------------------|-------------|---------------|------------|---------------|-------------|----------------|--------------|--------------|---------------|-------------|
| 20               | 3.9                               | <0.1        | 5.0           | 2.0        | 1.0           | 1.5         | 5.1            | 1.5          | 1.9          | 6.4           | 4.8         |
| 30               | 6.8                               | <0.1        | 0.2           | 2.2        | 0.3           | 1.5         | 8.2            | 0.7          | 1.0          | 1.6           | 8.6         |
| 40               | 6.1                               | <0.1        | <0.1          | 2.3        | 0.4           | 1.2         | 7.4            | 0.7          | 2.0          | 2.4           | 7.8         |
| 50               | 3.4                               | 0.3         | <0.1          | 2.1        | 0.7           | 1.8         | 7.2            | 1.4          | 3.4          | 4.2           | 7.5         |
| 60               | 0.8                               | 1.1         | <0.1          | 1.0        | 2.2           | 2.1         | 6.9            | 3.3          | 7.6          | 8.8           | 7.1         |
| 70               | 0.2                               | 2.5         | <0.1          | 0.9        | 2.0           | 1.5         | 6.6            | 2.2          | 16           | 17            | 6.9         |
| 80               | 0.3                               | 6.7         | <0.1          | 0.9        | 3.7           | 1.9         | 4.2            | <0.1         | 17           | 18            | 5.9         |
| 90               | 1.2                               | 6.0         | <0.1          | 1.3        | 7.4           | 1.3         | 3.5            | 0.5          | 24           | 26            | 5.5         |
| 96               | 0.7                               | 6.6         | <0.1          | 1.9        | 11            | 1.2         | 3.8            | 0.6          | 37           | 39            | 6.1         |
| 100              | 1.3                               | 8.1         | <0.1          | 1.4        | 12            | 1.5         | 3.2            | 0.8          | 41           | 43            | 8.9         |

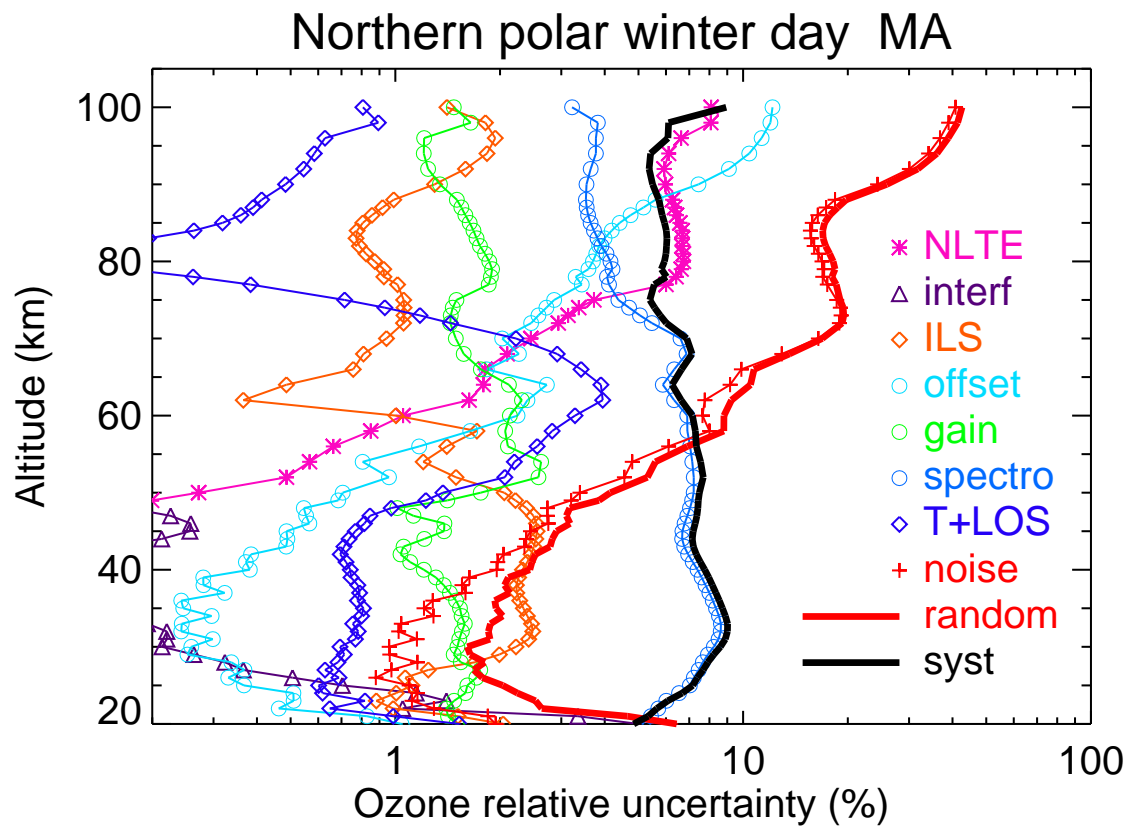

**Figure S1.** V8R\_O3\_561 Northern polar winter day.

**Table S3.** Ozone error budget for Northern polar winter night, MA. All uncertainties are  $1\sigma$ .

| altitude<br>(km) | mean O <sub>3</sub> vmr<br>(ppmv) | NLTE<br>(%) | interf<br>(%) | ILS<br>(%) | offset<br>(%) | gain<br>(%) | spectro<br>(%) | T+LOS<br>(%) | noise<br>(%) | random<br>(%) | syst<br>(%) |
|------------------|-----------------------------------|-------------|---------------|------------|---------------|-------------|----------------|--------------|--------------|---------------|-------------|
| 20               | 3.6                               | <0.1        | 3.4           | 2.2        | 0.9           | 1.6         | 6.2            | 1.7          | 2.2          | 5.2           | 6.2         |
| 30               | 5.6                               | <0.1        | 0.2           | 2.7        | 0.3           | 1.5         | 9.0            | 0.9          | 1.3          | 2.5           | 9.3         |
| 40               | 5.0                               | <0.1        | 0.1           | 2.8        | 0.4           | 1.1         | 7.9            | 0.8          | 2.0          | 3.4           | 8.0         |
| 50               | 2.3                               | 0.6         | 0.1           | 2.2        | 0.9           | 1.9         | 8.0            | 1.3          | 3.6          | 6.1           | 7.1         |
| 60               | 1.5                               | 1.5         | <0.1          | 1.8        | 1.8           | 1.9         | 3.6            | 2.5          | 6.1          | 7.1           | 4.3         |
| 70               | 3.3                               | 6.4         | <0.1          | 1.2        | 4.0           | 2.8         | 6.1            | 5.8          | 7.1          | 13            | 5.5         |
| 80               | 1.0                               | 10          | <0.1          | 1.0        | 3.2           | 2.5         | 4.1            | 0.5          | 11           | 15            | 5.4         |
| 90               | 7.2                               | 6.2         | <0.1          | 1.3        | 2.4           | 1.4         | 3.2            | 1.2          | 13           | 14            | 3.4         |
| 96               | 7.4                               | 5.2         | <0.1          | 3.1        | 4.1           | 0.9         | 3.2            | 1.5          | 18           | 19            | 4.6         |
| 100              | 5.7                               | 5.4         | <0.1          | 4.7        | 7.5           | 1.6         | 3.5            | 1.2          | 28           | 30            | 6.2         |

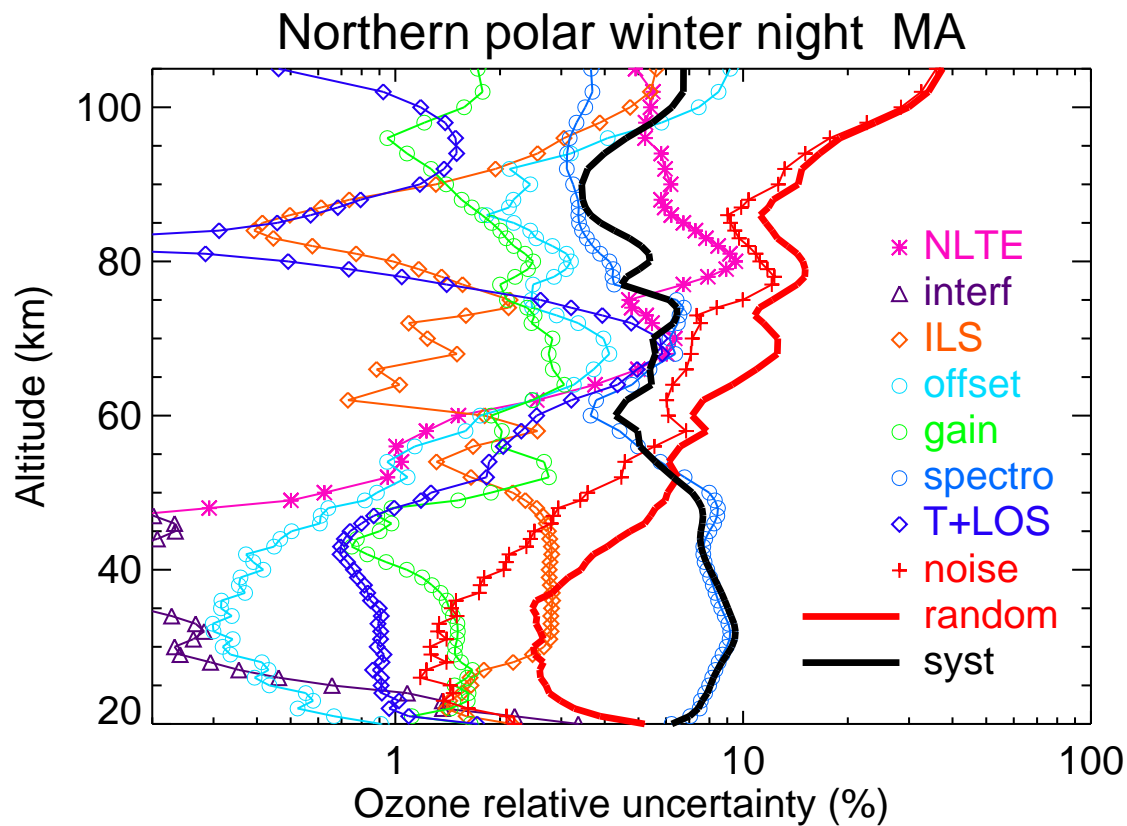

**Figure S2.** V8R\_O3\_561 Northern polar winter night.

**Table S4.** Ozone error budget for Northern polar spring day, MA. All uncertainties are  $1\sigma$ .

| altitude<br>(km) | mean O <sub>3</sub> vmr<br>(ppmv) | NLTE<br>(%) | interf<br>(%) | ILS<br>(%) | offset<br>(%) | gain<br>(%) | spectro<br>(%) | T+LOS<br>(%) | noise<br>(%) | random<br>(%) | syst<br>(%) |
|------------------|-----------------------------------|-------------|---------------|------------|---------------|-------------|----------------|--------------|--------------|---------------|-------------|
| 20               | 4.2                               | <0.1        | 2.9           | 2.2        | 1.2           | 2.7         | 4.6            | 1.8          | 2.4          | 4.6           | 5.6         |
| 30               | 4.8                               | <0.1        | 0.2           | 2.6        | 0.3           | 1.7         | 7.2            | 0.7          | 1.3          | 2.4           | 7.7         |
| 40               | 5.9                               | <0.1        | <0.1          | 2.6        | 0.4           | 1.4         | 6.5            | 0.7          | 1.6          | 2.0           | 7.1         |
| 50               | 2.1                               | <0.1        | 0.2           | 2.5        | 0.5           | 0.8         | 5.2            | 0.7          | 2.6          | 2.8           | 5.8         |
| 60               | 0.7                               | 0.5         | <0.1          | 1.8        | 1.6           | 1.5         | 5.0            | 1.9          | 4.9          | 5.7           | 5.3         |
| 70               | 0.2                               | 3.3         | <0.1          | 0.5        | 2.5           | 1.1         | 4.9            | 1.8          | 11           | 12            | 5.5         |
| 80               | 0.1                               | 5.4         | <0.1          | 0.9        | 2.3           | 1.0         | 3.7            | 0.3          | 15           | 16            | 6.0         |
| 90               | 0.6                               | 4.8         | <0.1          | 2.6        | 6.0           | 0.9         | 3.2            | 1.6          | 22           | 23            | 6.1         |
| 96               | 0.4                               | 8.1         | <0.1          | 4.1        | 10            | 0.9         | 3.8            | 2.0          | 35           | 37            | 7.5         |
| 100              | 0.5                               | 8.4         | <0.1          | 3.8        | 12            | 0.7         | 3.5            | 2.1          | 40           | 41            | 10          |

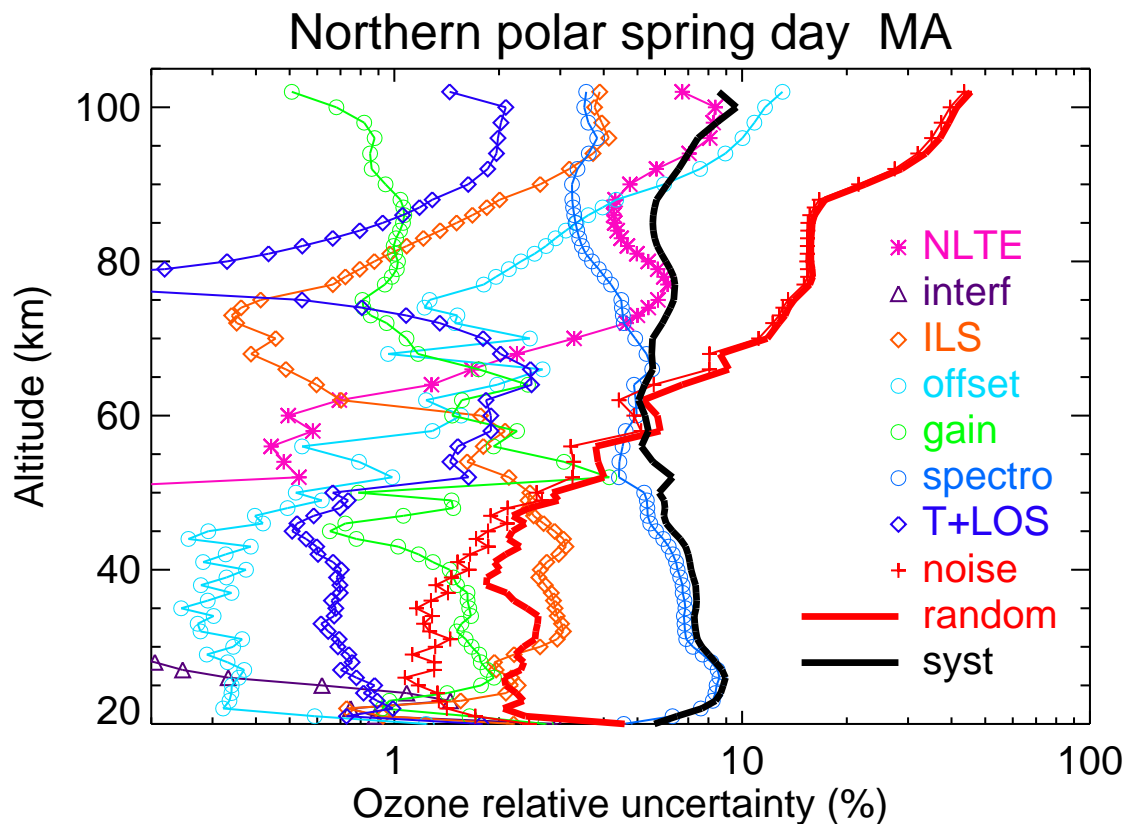

**Figure S3.** V8R\_O3\_561 Northern polar spring day.

**Table S5.** Ozone error budget for Northern polar spring night, MA. All uncertainties are  $1\sigma$ .

| altitude<br>(km) | mean O <sub>3</sub> vmr<br>(ppmv) | NLTE<br>(%) | interf<br>(%) | ILS<br>(%) | offset<br>(%) | gain<br>(%) | spectro<br>(%) | T+LOS<br>(%) | noise<br>(%) | random<br>(%) | syst<br>(%) |
|------------------|-----------------------------------|-------------|---------------|------------|---------------|-------------|----------------|--------------|--------------|---------------|-------------|
| 20               | 4.0                               | <0.1        | 2.8           | 1.9        | 1.2           | 2.5         | 4.7            | 1.7          | 2.3          | 4.5           | 5.4         |
| 30               | 6.0                               | <0.1        | 0.2           | 2.5        | 0.3           | 1.6         | 7.1            | 0.7          | 1.2          | 1.8           | 7.6         |
| 40               | 6.4                               | <0.1        | <0.1          | 2.6        | 0.3           | 1.5         | 7.2            | 0.8          | 1.6          | 2.1           | 7.8         |
| 50               | 2.4                               | <0.1        | 0.2           | 2.4        | 0.6           | 1.2         | 5.0            | 0.7          | 2.7          | 2.9           | 5.6         |
| 60               | 1.4                               | 0.6         | <0.1          | 1.7        | 1.5           | 1.6         | 3.8            | 2.1          | 4.1          | 5.0           | 4.3         |
| 70               | 1.1                               | 2.5         | <0.1          | 1.4        | 2.9           | 1.3         | 4.7            | 4.0          | 8.0          | 10            | 5.2         |
| 80               | 0.2                               | 4.0         | <0.1          | 0.6        | 1.2           | 0.8         | 3.1            | <0.1         | 14           | 14            | 4.9         |
| 90               | 6.5                               | 3.6         | <0.1          | 1.4        | 1.9           | 1.5         | 2.8            | 2.8          | 11           | 11            | 4.8         |
| 96               | 8.7                               | 5.4         | <0.1          | 2.3        | 3.0           | 1.3         | 2.7            | 3.4          | 13           | 14            | 5.8         |
| 100              | 5.1                               | 5.0         | <0.1          | 4.0        | 5.7           | 1.4         | 2.8            | 2.8          | 23           | 24            | 6.5         |

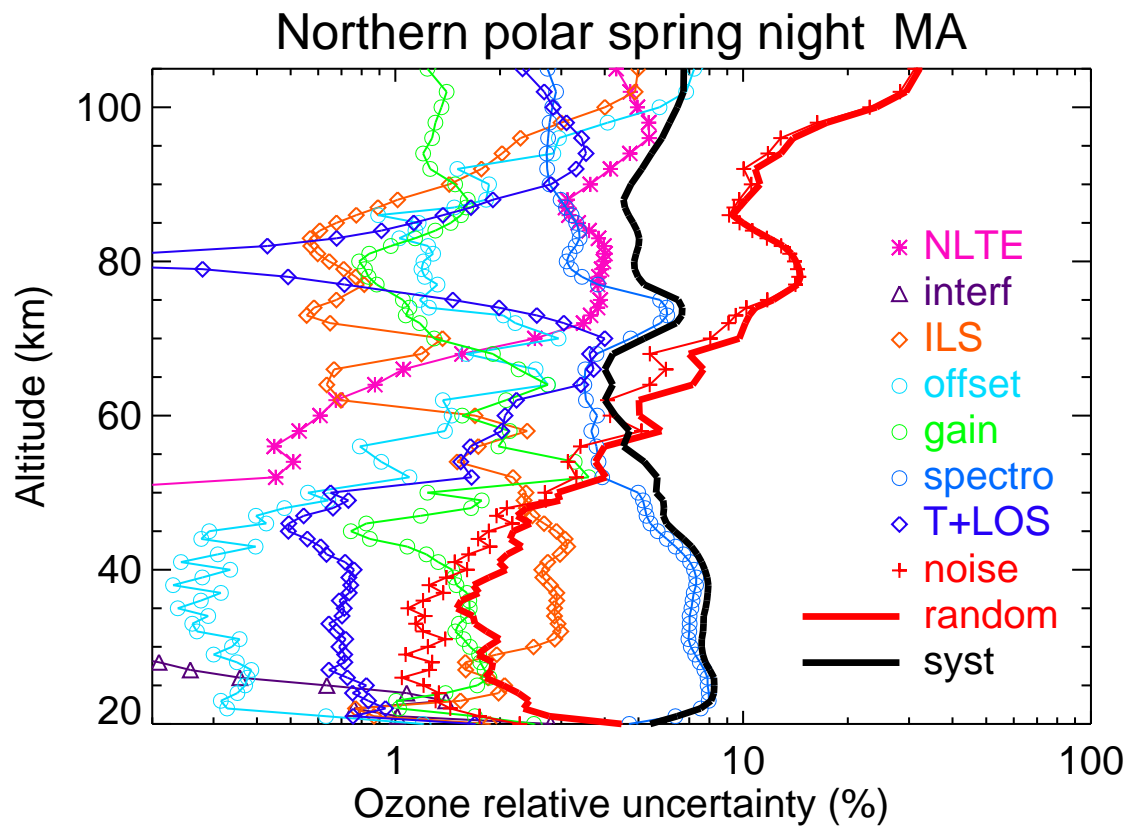

**Figure S4.** V8R\_O3\_561 Northern polar spring night.

**Table S6.** Ozone error budget for Northern polar summer day, MA. All uncertainties are  $1\sigma$ .

| altitude<br>(km) | mean O <sub>3</sub> vmr<br>(ppmv) | NLTE<br>(%) | interf<br>(%) | ILS<br>(%) | offset<br>(%) | gain<br>(%) | spectro<br>(%) | T+LOS<br>(%) | noise<br>(%) | random<br>(%) | syst<br>(%) |
|------------------|-----------------------------------|-------------|---------------|------------|---------------|-------------|----------------|--------------|--------------|---------------|-------------|
| 20               | 2.3                               | <0.1        | 3.9           | 1.5        | 1.0           | 2.4         | 4.0            | 1.4          | 2.2          | 5.0           | 4.8         |
| 30               | 4.6                               | <0.1        | 0.2           | 2.4        | 0.3           | 1.8         | 5.9            | 0.4          | 1.0          | 1.5           | 6.5         |
| 40               | 5.9                               | <0.1        | <0.1          | 1.7        | 0.3           | 1.7         | 5.8            | 0.6          | 1.4          | 1.6           | 6.3         |
| 50               | 2.4                               | <0.1        | 0.2           | 2.5        | 0.5           | 1.6         | 4.5            | 0.6          | 2.3          | 2.5           | 5.4         |
| 60               | 1.1                               | 0.2         | <0.1          | 1.3        | 1.2           | 1.5         | 4.6            | 1.7          | 3.3          | 4.1           | 4.9         |
| 70               | 0.4                               | 4.1         | <0.1          | 1.6        | 2.3           | 0.9         | 6.0            | 2.1          | 8.6          | 9.3           | 7.3         |
| 80               | 0.1                               | 7.5         | <0.1          | 0.8        | 2.4           | 0.7         | 4.0            | 1.4          | 15           | 16            | 7.9         |
| 90               | 1.0                               | 8.1         | <0.1          | 1.2        | 4.9           | 1.2         | 3.3            | 4.7          | 17           | 19            | 6.6         |
| 96               | 0.6                               | 12          | <0.1          | 2.6        | 8.4           | 1.8         | 4.4            | 5.1          | 31           | 33            | 10          |

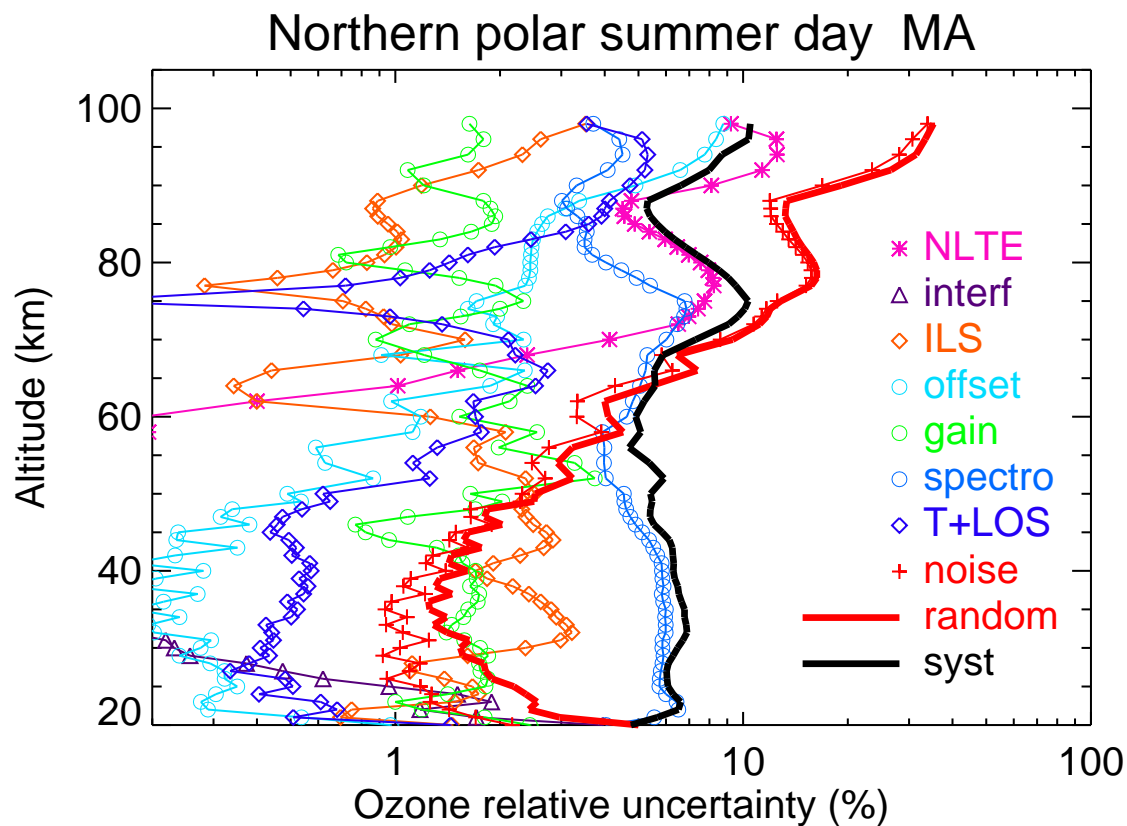

**Figure S5.** V8R\_O3\_561 Northern polar summer day.

**Table S7.** Ozone error budget for Northern polar summer night, MA. All uncertainties are  $1\sigma$ .

| altitude<br>(km) | mean O <sub>3</sub> vmr<br>(ppmv) | NLTE<br>(%) | interf<br>(%) | ILS<br>(%) | offset<br>(%) | gain<br>(%) | spectro<br>(%) | T+LOS<br>(%) | noise<br>(%) | random<br>(%) | syst<br>(%) |
|------------------|-----------------------------------|-------------|---------------|------------|---------------|-------------|----------------|--------------|--------------|---------------|-------------|
| 20               | 2.4                               | <0.1        | 3.3           | 1.3        | 1.0           | 2.1         | 3.9            | 1.4          | 2.0          | 4.5           | 4.4         |
| 30               | 5.2                               | <0.1        | 0.2           | 2.4        | 0.3           | 1.7         | 6.6            | 0.5          | 1.0          | 2.2           | 7.0         |
| 40               | 6.4                               | <0.1        | <0.1          | 1.9        | 0.3           | 1.6         | 6.7            | 0.7          | 1.5          | 1.7           | 7.1         |
| 50               | 2.7                               | <0.1        | 0.1           | 2.4        | 0.5           | 1.5         | 4.9            | 0.6          | 2.6          | 2.8           | 5.6         |
| 60               | 1.4                               | 0.3         | <0.1          | 1.3        | 1.5           | 1.5         | 4.2            | 2.1          | 4.0          | 4.8           | 4.5         |
| 70               | 1.1                               | 3.8         | <0.1          | 1.9        | 3.1           | 0.9         | 4.4            | 3.4          | 8.8          | 10            | 6.0         |
| 80               | 0.1                               | 5.1         | <0.1          | 1.1        | 1.8           | 0.7         | 3.4            | 1.2          | 15           | 15            | 6.0         |
| 90               | 3.7                               | 4.4         | <0.1          | 1.7        | 2.0           | 1.2         | 2.8            | 3.1          | 12           | 13            | 5.3         |
| 96               | 4.0                               | 5.2         | <0.1          | 2.9        | 5.3           | 1.1         | 3.0            | 2.6          | 22           | 23            | 6.3         |
| 100              | 2.0                               | 5.4         | <0.1          | 4.2        | 8.2           | 1.3         | 3.4            | 2.0          | 32           | 33            | 7.0         |

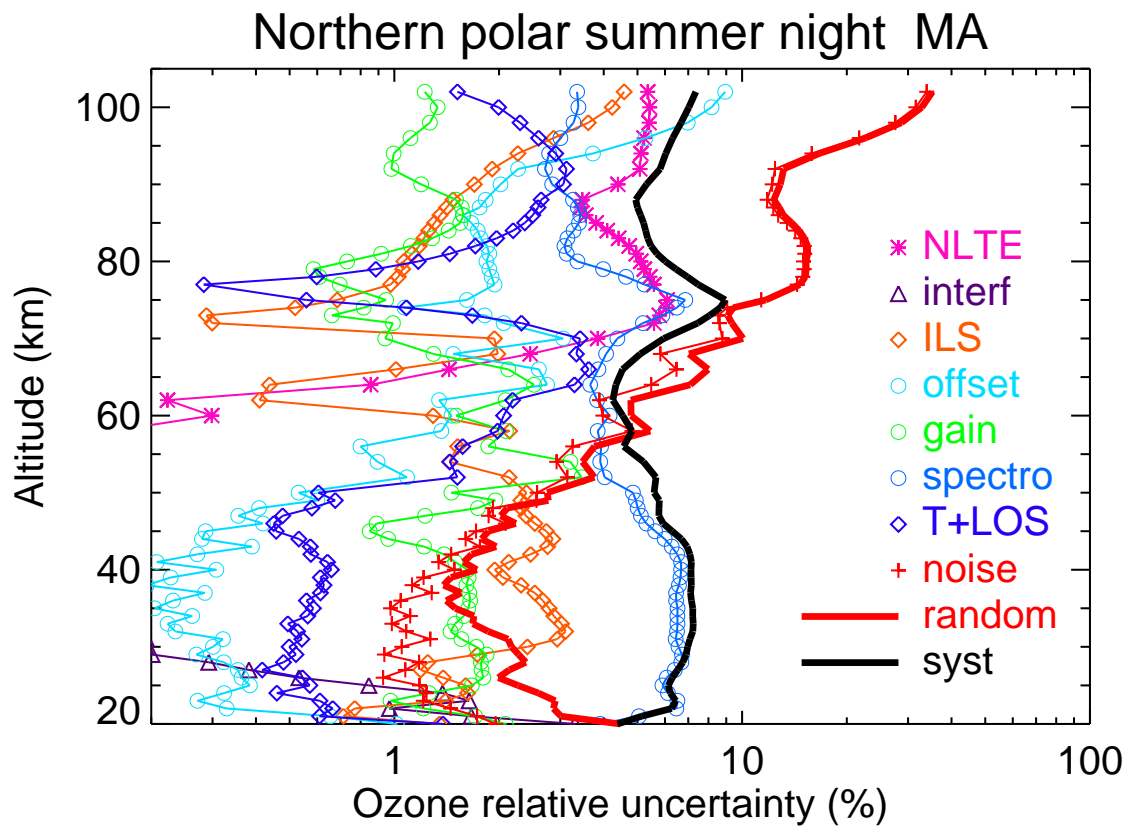

**Figure S6.** V8R\_O3\_561 Northern polar summer night.



**Table S8.** Ozone error budget for Northern polar autumn day, MA. All uncertainties are  $1\sigma$ .

| altitude<br>(km) | mean O <sub>3</sub> vmr<br>(ppmv) | NLTE<br>(%) | interf<br>(%) | ILS<br>(%) | offset<br>(%) | gain<br>(%) | spectro<br>(%) | T+LOS<br>(%) | noise<br>(%) | random<br>(%) | syst<br>(%) |
|------------------|-----------------------------------|-------------|---------------|------------|---------------|-------------|----------------|--------------|--------------|---------------|-------------|
| 20               | 2.6                               | <0.1        | 4.7           | 2.3        | 1.1           | 2.2         | 4.1            | 1.5          | 2.0          | 5.8           | 4.8         |
| 30               | 4.7                               | <0.1        | 0.2           | 2.5        | 0.3           | 1.6         | 7.7            | 0.7          | 1.3          | 2.7           | 7.9         |
| 40               | 5.9                               | <0.1        | <0.1          | 2.7        | 0.4           | 1.4         | 7.2            | 0.8          | 1.8          | 2.6           | 7.6         |
| 50               | 2.4                               | <0.1        | 0.1           | 2.5        | 0.6           | 0.7         | 6.6            | 0.8          | 2.9          | 3.2           | 7.0         |
| 60               | 0.7                               | 0.6         | <0.1          | 1.5        | 1.9           | 1.6         | 5.5            | 2.2          | 5.9          | 6.7           | 5.9         |
| 70               | 0.2                               | 2.3         | <0.1          | 0.5        | 2.4           | 1.3         | 5.5            | 2.0          | 12           | 13            | 5.7         |
| 80               | 0.1                               | 4.1         | <0.1          | 1.1        | 3.4           | 1.0         | 3.7            | 0.1          | 17           | 17            | 5.5         |
| 90               | 0.8                               | 6.1         | <0.1          | 2.2        | 7.2           | 0.9         | 3.6            | 1.0          | 24           | 25            | 6.7         |
| 96               | 0.5                               | 8.5         | <0.1          | 3.4        | 11            | 0.8         | 3.8            | 1.3          | 36           | 38            | 7.9         |

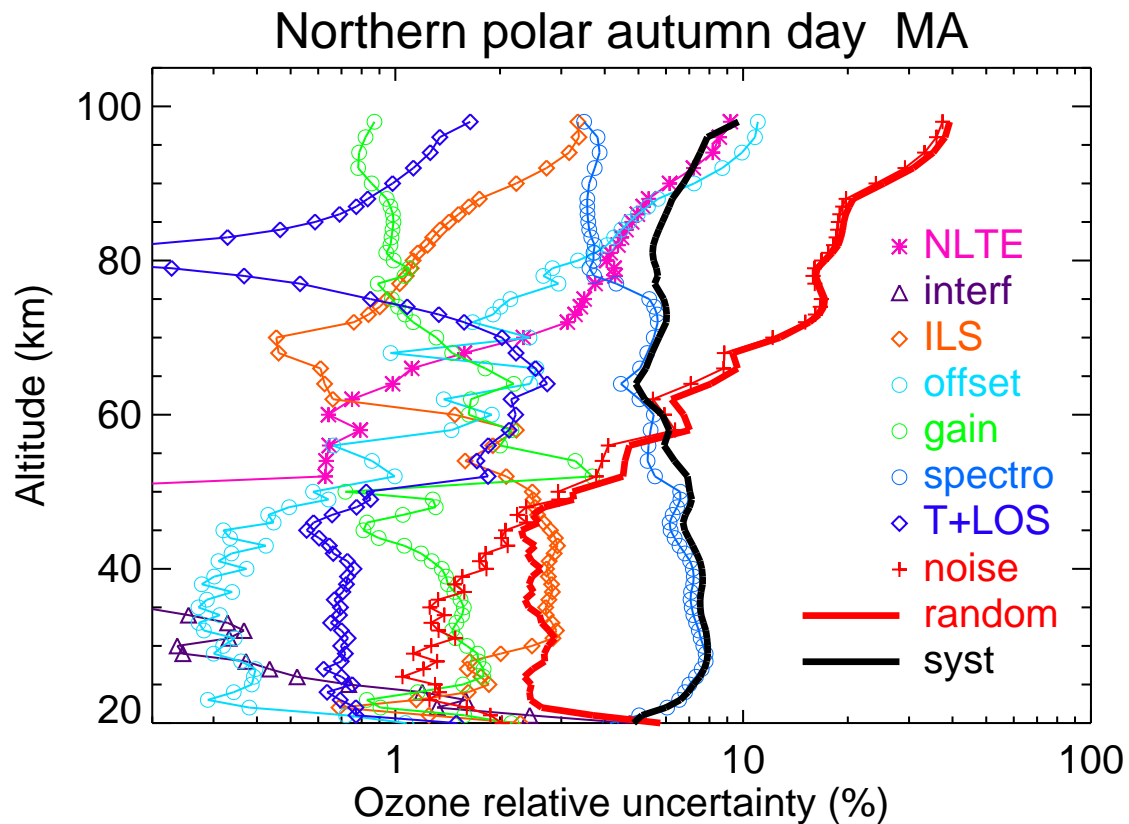

**Figure S7.** V8R\_O3\_561 Northern polar autumn day.

**Table S9.** Ozone error budget for Northern polar autumn night, MA. All uncertainties are  $1\sigma$ .

| altitude<br>(km) | mean O <sub>3</sub> vmr<br>(ppmv) | NLTE<br>(%) | interf<br>(%) | ILS<br>(%) | offset<br>(%) | gain<br>(%) | spectro<br>(%) | T+LOS<br>(%) | noise<br>(%) | random<br>(%) | syst<br>(%) |
|------------------|-----------------------------------|-------------|---------------|------------|---------------|-------------|----------------|--------------|--------------|---------------|-------------|
| 20               | 2.6                               | <0.1        | 4.5           | 2.7        | 1.0           | 2.0         | 5.1            | 1.5          | 2.0          | 5.5           | 5.9         |
| 30               | 3.6                               | <0.1        | 0.3           | 2.7        | 0.3           | 1.6         | 8.3            | 0.7          | 1.4          | 2.3           | 8.8         |
| 40               | 4.7                               | <0.1        | <0.1          | 2.9        | 0.4           | 1.3         | 7.1            | 0.7          | 2.0          | 3.3           | 7.3         |
| 50               | 2.4                               | 0.2         | 0.2           | 2.4        | 0.7           | 1.1         | 6.3            | 0.8          | 3.2          | 3.4           | 6.8         |
| 60               | 1.3                               | 1.1         | <0.1          | 1.6        | 1.7           | 1.9         | 3.6            | 2.2          | 4.8          | 5.6           | 4.4         |
| 70               | 1.5                               | 2.7         | <0.1          | 1.1        | 4.0           | 2.3         | 3.8            | 4.9          | 9.0          | 12            | 3.8         |
| 80               | 0.7                               | 3.8         | <0.1          | 1.1        | 1.3           | 1.2         | 4.1            | 1.2          | 13           | 13            | 4.7         |
| 90               | 12                                | 7.0         | <0.1          | 1.2        | 1.6           | 1.5         | 3.0            | 1.3          | 11           | 11            | 7.2         |
| 96               | 12                                | 7.1         | <0.1          | 3.0        | 2.8           | 1.2         | 2.8            | 2.4          | 14           | 14            | 7.6         |
| 100              | 8.7                               | 6.5         | <0.1          | 4.4        | 5.6           | 1.3         | 2.9            | 2.3          | 23           | 24            | 7.6         |

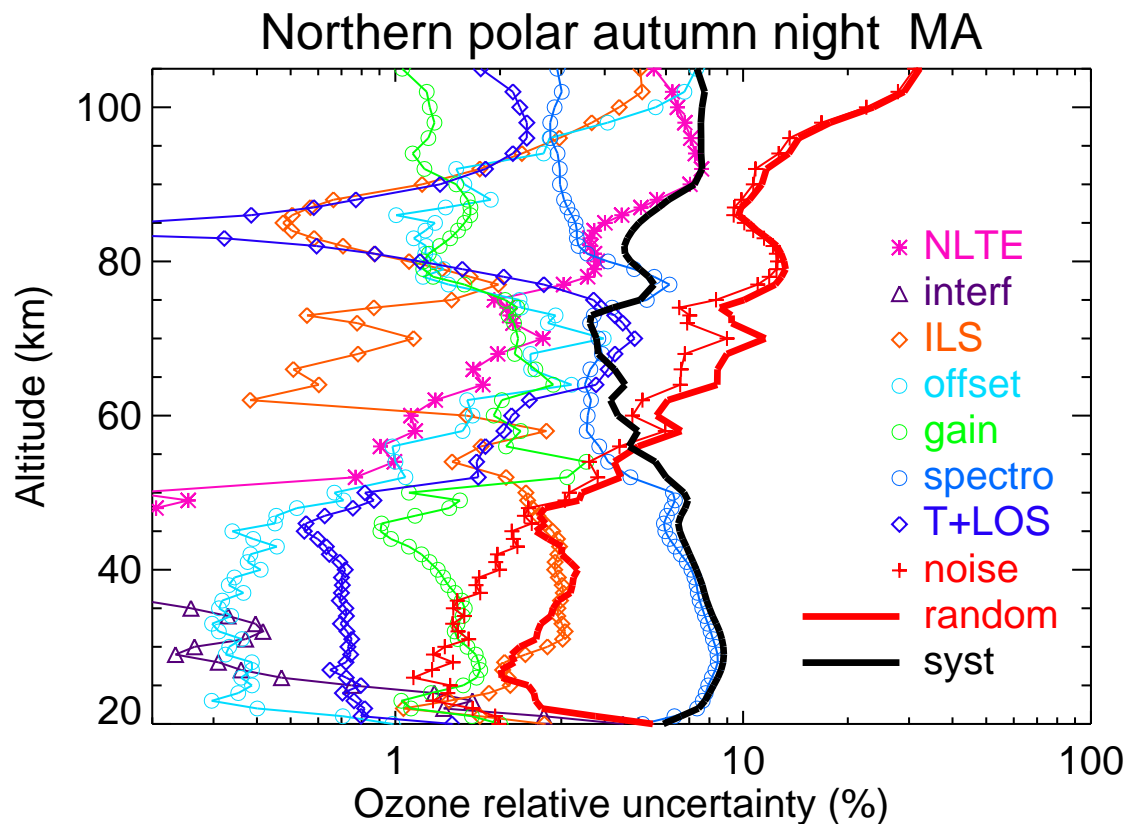

**Figure S8.** V8R\_O3\_561 Northern polar autumn night.

**Table S10.** Ozone error budget for Northern midlatitude winter day, MA. All uncertainties are  $1\sigma$ .

| altitude<br>(km) | mean O <sub>3</sub> vmr<br>(ppmv) | NLTE<br>(%) | interf<br>(%) | ILS<br>(%) | offset<br>(%) | gain<br>(%) | spectro<br>(%) | T+LOS<br>(%) | noise<br>(%) | random<br>(%) | syst<br>(%) |
|------------------|-----------------------------------|-------------|---------------|------------|---------------|-------------|----------------|--------------|--------------|---------------|-------------|
| 20               | 3.1                               | <0.1        | 1.9           | 0.6        | 0.7           | 0.6         | 5.3            | 1.2          | 1.7          | 4.2           | 4.4         |
| 30               | 6.7                               | <0.1        | 0.2           | 2.7        | 0.3           | 1.5         | 7.6            | 0.7          | 0.9          | 1.6           | 8.1         |
| 40               | 7.4                               | <0.1        | <0.1          | 2.5        | 0.4           | 1.4         | 7.0            | 0.7          | 1.6          | 1.9           | 7.5         |
| 50               | 2.6                               | 0.3         | <0.1          | 2.2        | 0.7           | 3.2         | 5.9            | 1.3          | 2.4          | 3.2           | 6.9         |
| 60               | 0.8                               | 0.6         | <0.1          | 1.4        | 1.7           | 1.8         | 5.4            | 2.4          | 5.2          | 6.1           | 5.7         |
| 70               | 0.3                               | 3.0         | <0.1          | 0.5        | 2.4           | 1.1         | 5.5            | 2.9          | 11           | 12            | 6.0         |
| 80               | 0.1                               | 3.6         | <0.1          | 1.3        | 3.2           | 1.1         | 3.8            | <0.1         | 17           | 18            | 5.1         |
| 90               | 0.9                               | 5.0         | <0.1          | 2.2        | 6.7           | 0.9         | 3.9            | 0.7          | 23           | 24            | 5.7         |
| 96               | 0.6                               | 6.2         | <0.1          | 3.2        | 11            | 1.0         | 4.3            | 1.0          | 36           | 37            | 6.7         |
| 100              | 0.8                               | 4.8         | <0.1          | 2.2        | 10            | 0.9         | 3.6            | 0.9          | 36           | 37            | 6.5         |

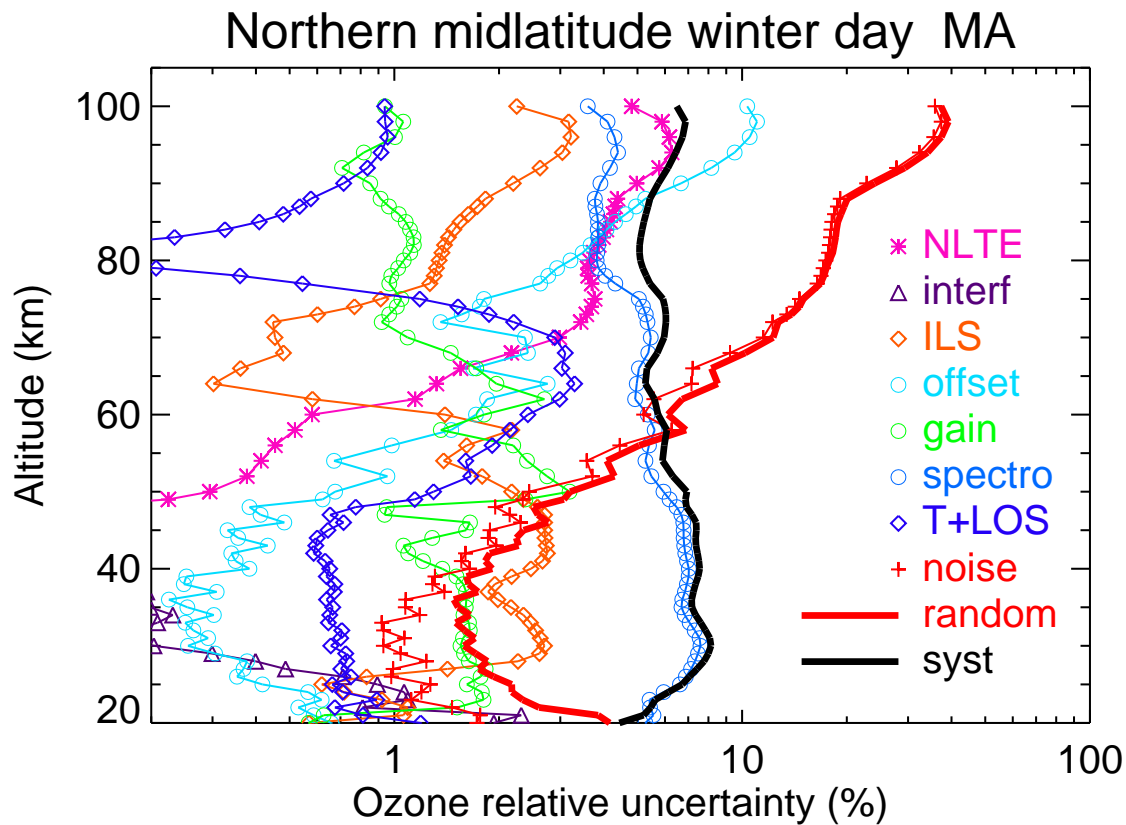

**Figure S9.** V8R\_O3\_561 Northern midlatitude winter day.

**Table S11.** Ozone error budget for Northern midlatitude winter night, MA. All uncertainties are  $1\sigma$ .

| altitude<br>(km) | mean O <sub>3</sub> vmr<br>(ppmv) | NLTE<br>(%) | interf<br>(%) | ILS<br>(%) | offset<br>(%) | gain<br>(%) | spectro<br>(%) | T+LOS<br>(%) | noise<br>(%) | random<br>(%) | syst<br>(%) |
|------------------|-----------------------------------|-------------|---------------|------------|---------------|-------------|----------------|--------------|--------------|---------------|-------------|
| 20               | 3.6                               | <0.1        | 1.8           | 0.8        | 0.7           | 1.2         | 5.3            | 1.1          | 1.8          | 4.0           | 4.7         |
| 30               | 6.7                               | <0.1        | 0.3           | 3.0        | 0.3           | 1.6         | 8.2            | 0.7          | 1.1          | 1.7           | 8.8         |
| 40               | 7.3                               | <0.1        | 0.1           | 2.4        | 0.3           | 1.4         | 7.6            | 0.7          | 1.5          | 1.9           | 8.1         |
| 50               | 2.7                               | 0.3         | <0.1          | 2.3        | 0.7           | 2.2         | 5.8            | 1.1          | 2.7          | 3.6           | 6.3         |
| 60               | 1.4                               | 0.5         | <0.1          | 1.7        | 1.6           | 1.4         | 4.2            | 2.3          | 6.3          | 7.2           | 4.5         |
| 70               | 1.1                               | 1.6         | <0.1          | 1.1        | 2.5           | 2.0         | 4.9            | 4.3          | 8.2          | 10            | 4.8         |
| 80               | 0.4                               | 3.5         | <0.1          | 1.3        | 2.2           | 2.5         | 3.8            | 0.3          | 13           | 14            | 3.6         |
| 90               | 5.4                               | 4.1         | <0.1          | 1.0        | 2.1           | 1.4         | 3.0            | 1.4          | 12           | 13            | 4.7         |
| 96               | 8.7                               | 5.3         | <0.1          | 1.5        | 3.0           | 1.1         | 2.8            | 1.5          | 14           | 15            | 5.1         |
| 100              | 7.1                               | 4.8         | <0.1          | 2.8        | 5.7           | 0.8         | 2.8            | 0.9          | 23           | 24            | 5.3         |

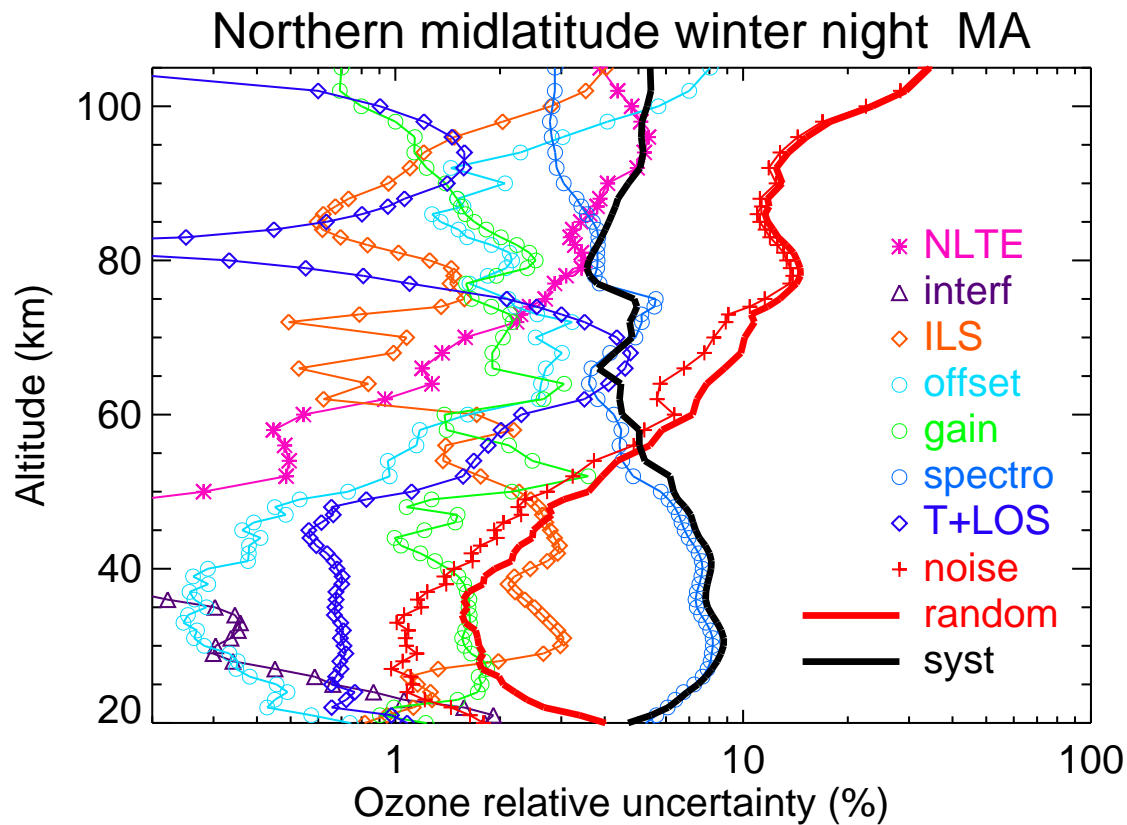

**Figure S10.** V8R\_O3\_561 Northern midlatitude winter night.

**Table S12.** Ozone error budget for Northern midlatitude spring day, MA. All uncertainties are  $1\sigma$ .

| altitude<br>(km) | mean O <sub>3</sub> vmr<br>(ppmv) | NLTE<br>(%) | interf<br>(%) | ILS<br>(%) | offset<br>(%) | gain<br>(%) | spectro<br>(%) | T+LOS<br>(%) | noise<br>(%) | random<br>(%) | syst<br>(%) |
|------------------|-----------------------------------|-------------|---------------|------------|---------------|-------------|----------------|--------------|--------------|---------------|-------------|
| 20               | 2.9                               | <0.1        | 2.7           | 0.8        | 1.0           | 1.9         | 4.0            | 1.4          | 1.9          | 4.1           | 4.1         |
| 30               | 8.1                               | <0.1        | 0.2           | 2.4        | 0.3           | 1.7         | 6.7            | 0.6          | 1.1          | 1.7           | 7.3         |
| 40               | 6.8                               | <0.1        | 0.2           | 2.1        | 0.3           | 1.6         | 7.1            | 0.7          | 1.4          | 1.8           | 7.6         |
| 50               | 2.5                               | <0.1        | 0.1           | 2.4        | 0.4           | 0.5         | 5.4            | 0.6          | 2.3          | 2.6           | 5.9         |
| 60               | 1.0                               | 0.2         | <0.1          | 2.0        | 1.7           | 1.1         | 5.4            | 2.2          | 6.1          | 6.8           | 5.7         |
| 70               | 0.2                               | 4.1         | <0.1          | 0.5        | 1.6           | 1.1         | 5.3            | 2.3          | 11           | 11            | 6.6         |
| 80               | 0.2                               | 5.9         | <0.1          | 0.7        | 2.2           | 0.9         | 3.6            | 0.2          | 15           | 15            | 6.8         |
| 90               | 0.7                               | 5.6         | <0.1          | 2.7        | 6.4           | 1.0         | 3.3            | 1.5          | 23           | 24            | 6.3         |
| 96               | 0.3                               | 6.1         | <0.1          | 3.9        | 10            | 0.7         | 3.2            | 1.9          | 36           | 37            | 7.3         |

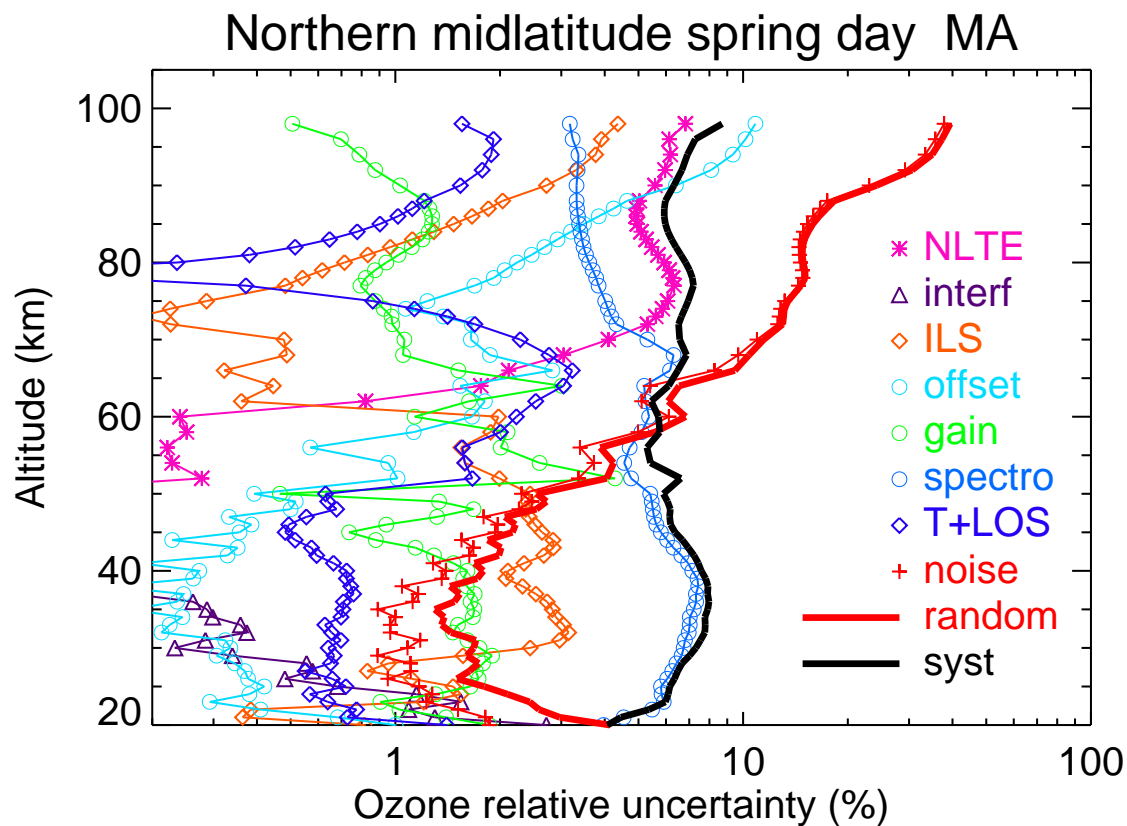

**Figure S11.** V8R\_O3\_561 Northern midlatitude spring day.

**Table S13.** Ozone error budget for Northern midlatitude spring night, MA. All uncertainties are  $1\sigma$ .

| altitude<br>(km) | mean O <sub>3</sub> vmr<br>(ppmv) | NLTE<br>(%) | interf<br>(%) | ILS<br>(%) | offset<br>(%) | gain<br>(%) | spectro<br>(%) | T+LOS<br>(%) | noise<br>(%) | random<br>(%) | syst<br>(%) |
|------------------|-----------------------------------|-------------|---------------|------------|---------------|-------------|----------------|--------------|--------------|---------------|-------------|
| 20               | 2.9                               | <0.1        | 2.7           | 0.8        | 1.0           | 1.9         | 4.1            | 1.4          | 1.9          | 4.2           | 4.2         |
| 30               | 7.7                               | <0.1        | 0.2           | 2.4        | 0.3           | 1.7         | 6.9            | 0.7          | 1.1          | 1.6           | 7.5         |
| 40               | 7.0                               | <0.1        | 0.2           | 2.3        | 0.3           | 1.5         | 7.4            | 0.8          | 1.5          | 1.9           | 7.8         |
| 50               | 2.7                               | <0.1        | 0.1           | 2.4        | 0.5           | 1.0         | 5.1            | 0.6          | 2.5          | 2.7           | 5.7         |
| 60               | 1.4                               | 0.4         | <0.1          | 1.7        | 1.6           | 1.4         | 3.9            | 2.2          | 4.8          | 5.6           | 4.4         |
| 70               | 1.1                               | 2.3         | <0.1          | 1.6        | 2.8           | 1.6         | 4.2            | 4.1          | 7.8          | 10            | 4.9         |
| 80               | 0.2                               | 4.6         | <0.1          | 0.8        | 1.3           | 0.9         | 3.2            | <0.1         | 14           | 15            | 5.3         |
| 90               | 7.2                               | 4.4         | <0.1          | 1.0        | 2.2           | 1.6         | 2.9            | 3.4          | 11           | 12            | 5.1         |
| 96               | 12                                | 6.9         | <0.1          | 1.4        | 3.0           | 1.2         | 2.7            | 3.8          | 12           | 14            | 6.9         |
| 100              | 7.3                               | 6.7         | <0.1          | 3.1        | 5.4           | 1.2         | 2.8            | 2.7          | 21           | 22            | 7.1         |

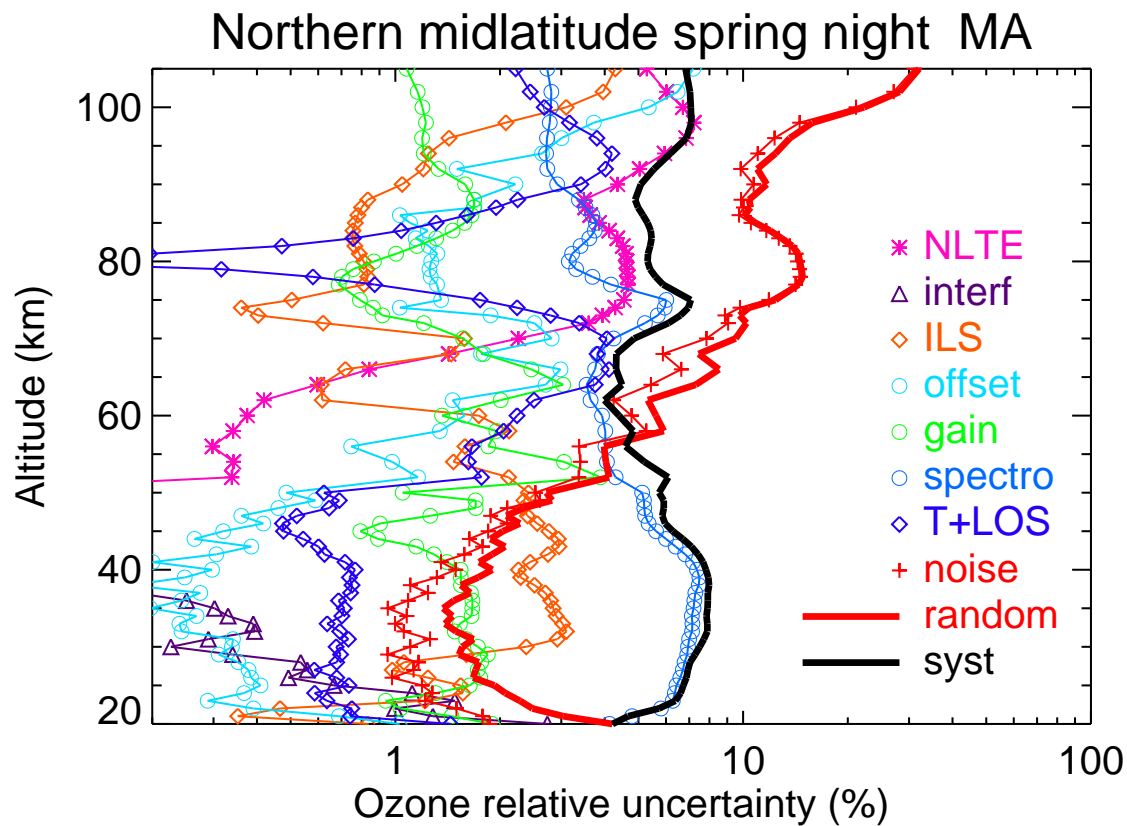

**Figure S12.** V8R\_O3\_561 Northern midlatitude spring night.

**Table S14.** Ozone error budget for Northern midlatitude summer day, MA. All uncertainties are  $1\sigma$ .

| altitude<br>(km) | mean O <sub>3</sub> vmr<br>(ppmv) | NLTE<br>(%) | interf<br>(%) | ILS<br>(%) | offset<br>(%) | gain<br>(%) | spectro<br>(%) | T+LOS<br>(%) | noise<br>(%) | random<br>(%) | syst<br>(%) |
|------------------|-----------------------------------|-------------|---------------|------------|---------------|-------------|----------------|--------------|--------------|---------------|-------------|
| 20               | 2.2                               | <0.1        | 2.5           | 0.5        | 0.9           | 1.5         | 4.0            | 1.3          | 1.8          | 3.7           | 4.1         |
| 30               | 7.1                               | <0.1        | 0.3           | 2.4        | 0.3           | 1.8         | 6.6            | 0.5          | 1.0          | 1.5           | 7.3         |
| 40               | 6.6                               | <0.1        | 0.2           | 1.8        | 0.3           | 1.7         | 6.8            | 0.7          | 1.4          | 1.7           | 7.3         |
| 50               | 2.6                               | <0.1        | 0.1           | 2.5        | 0.4           | 0.9         | 5.0            | 0.6          | 2.3          | 2.5           | 5.6         |
| 60               | 1.1                               | 0.2         | <0.1          | 1.6        | 1.5           | 1.0         | 5.2            | 2.1          | 5.0          | 5.8           | 5.4         |
| 70               | 0.3                               | 5.9         | <0.1          | 1.0        | 1.7           | 0.6         | 6.9            | 2.1          | 11           | 11            | 8.9         |
| 80               | 0.1                               | 7.5         | <0.1          | 0.6        | 2.2           | 1.2         | 3.9            | 1.8          | 15           | 16            | 7.5         |
| 90               | 1.2                               | 11          | <0.1          | 2.5        | 5.3           | 0.9         | 3.5            | 3.3          | 20           | 22            | 8.9         |
| 96               | 0.7                               | 14          | 0.1           | 4.3        | 9.1           | 1.7         | 4.0            | 2.7          | 34           | 36            | 12          |

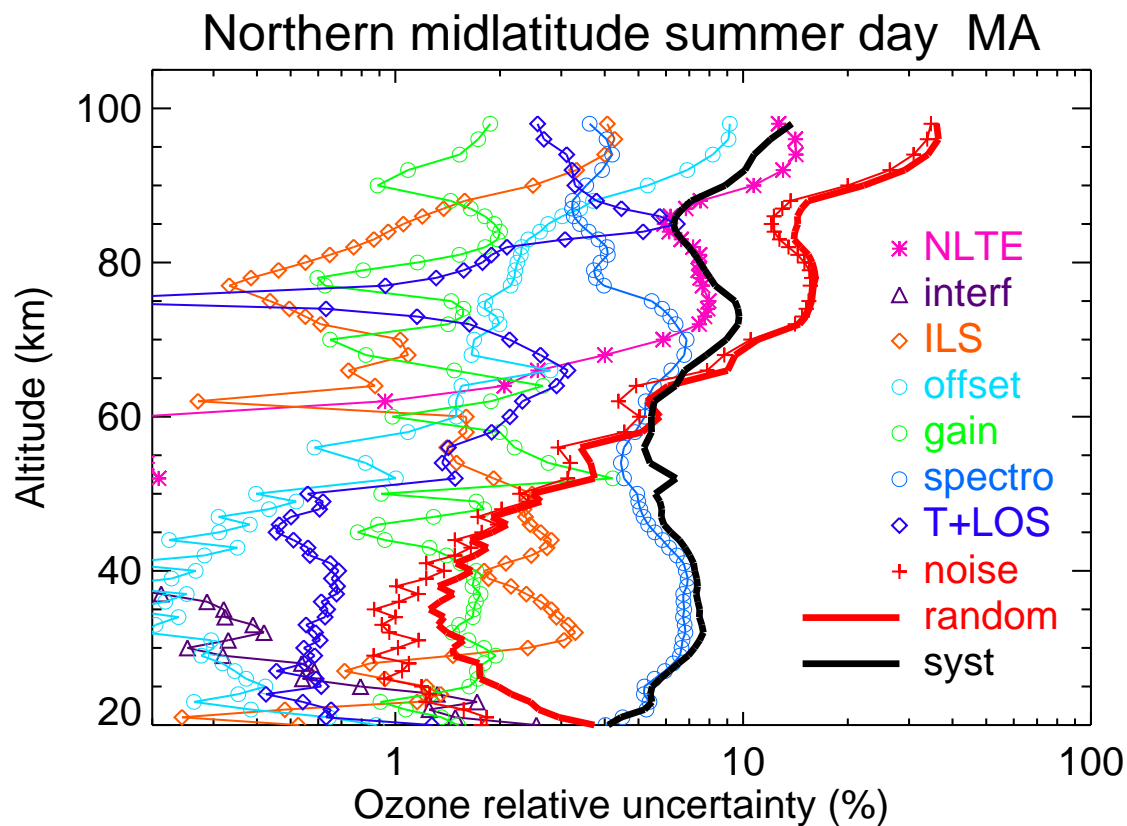

**Figure S13.** V8R\_O3\_561 Northern midlatitude summer day.

**Table S15.** Ozone error budget for Northern midlatitude summer night, MA. All uncertainties are  $1\sigma$ .

| altitude<br>(km) | mean O <sub>3</sub> vmr<br>(ppmv) | NLTE<br>(%) | interf<br>(%) | ILS<br>(%) | offset<br>(%) | gain<br>(%) | spectro<br>(%) | T+LOS<br>(%) | noise<br>(%) | random<br>(%) | syst<br>(%) |
|------------------|-----------------------------------|-------------|---------------|------------|---------------|-------------|----------------|--------------|--------------|---------------|-------------|
| 20               | 2.2                               | <0.1        | 2.8           | 0.5        | 0.9           | 1.8         | 3.9            | 1.3          | 1.8          | 3.9           | 4.2         |
| 30               | 7.0                               | <0.1        | 0.2           | 2.2        | 0.3           | 1.8         | 6.3            | 0.5          | 1.0          | 1.5           | 6.9         |
| 40               | 6.5                               | <0.1        | 0.2           | 1.7        | 0.3           | 1.7         | 6.6            | 0.7          | 1.4          | 1.7           | 7.0         |
| 50               | 2.8                               | <0.1        | 0.1           | 2.4        | 0.5           | 1.4         | 4.5            | 0.5          | 2.4          | 2.6           | 5.3         |
| 60               | 1.5                               | 0.3         | <0.1          | 1.2        | 1.4           | 1.0         | 4.5            | 2.0          | 4.1          | 4.9           | 4.6         |
| 70               | 1.1                               | 5.1         | <0.1          | 2.2        | 2.8           | 1.2         | 4.9            | 3.6          | 8.9          | 10            | 7.1         |
| 80               | 0.2                               | 10          | <0.1          | 0.9        | 1.3           | 2.4         | 4.6            | 2.0          | 13           | 15            | 7.9         |
| 90               | 6.8                               | 11          | <0.1          | 1.4        | 2.8           | 1.2         | 2.9            | 4.4          | 11           | 14            | 10          |
| 96               | 5.8                               | 11          | <0.1          | 2.6        | 4.9           | 1.4         | 3.5            | 2.7          | 20           | 22            | 10          |
| 100              | 2.1                               | 11          | <0.1          | 4.2        | 7.4           | 1.3         | 3.7            | 2.0          | 29           | 31            | 10          |

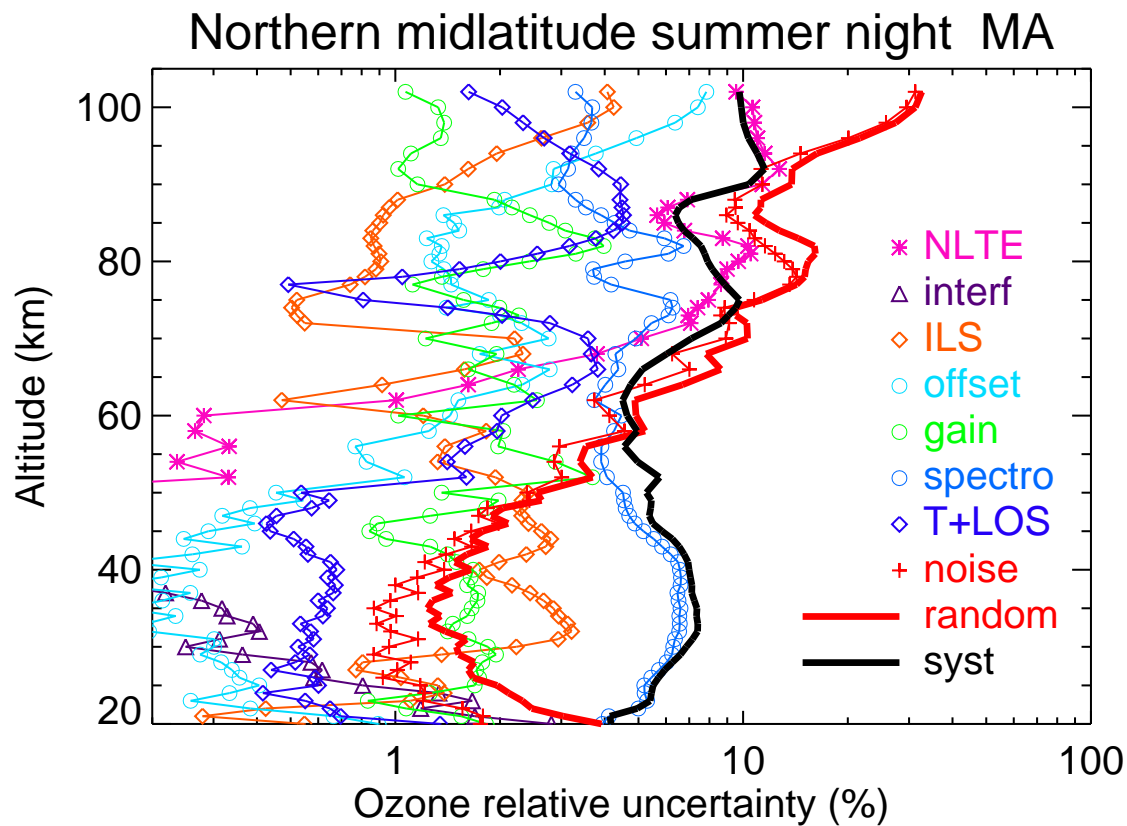

**Figure S14.** V8R\_O3\_561 Northern midlatitude summer night.



**Table S16.** Ozone error budget for Northern midlatitude autumn day, MA. All uncertainties are  $1\sigma$ .

| altitude<br>(km) | mean O <sub>3</sub> vmr<br>(ppmv) | NLTE<br>(%) | interf<br>(%) | ILS<br>(%) | offset<br>(%) | gain<br>(%) | spectro<br>(%) | T+LOS<br>(%) | noise<br>(%) | random<br>(%) | syst<br>(%) |
|------------------|-----------------------------------|-------------|---------------|------------|---------------|-------------|----------------|--------------|--------------|---------------|-------------|
| 20               | 2.2                               | <0.1        | 2.9           | 1.3        | 1.0           | 1.6         | 3.9            | 1.3          | 1.7          | 4.0           | 4.1         |
| 30               | 6.7                               | <0.1        | 0.2           | 2.4        | 0.3           | 1.7         | 7.1            | 0.7          | 1.1          | 1.9           | 7.5         |
| 40               | 7.3                               | <0.1        | 0.1           | 2.2        | 0.3           | 1.5         | 7.3            | 0.8          | 1.6          | 1.9           | 7.7         |
| 50               | 2.6                               | <0.1        | 0.1           | 2.4        | 0.5           | 0.6         | 6.0            | 0.7          | 2.6          | 2.8           | 6.5         |
| 60               | 0.8                               | 0.4         | <0.1          | 1.6        | 1.8           | 1.4         | 5.8            | 2.3          | 6.3          | 7.1           | 6.0         |
| 70               | 0.3                               | 3.4         | <0.1          | 0.3        | 2.0           | 1.3         | 4.8            | 2.2          | 11           | 12            | 5.6         |
| 80               | 0.1                               | 5.2         | <0.1          | 0.8        | 2.8           | 1.1         | 3.7            | 0.1          | 16           | 17            | 6.1         |
| 90               | 0.9                               | 6.7         | <0.1          | 2.2        | 6.3           | 1.1         | 3.5            | 1.0          | 22           | 24            | 6.7         |
| 96               | 0.5                               | 7.9         | <0.1          | 3.1        | 10            | 0.7         | 3.4            | 1.5          | 35           | 37            | 8.0         |

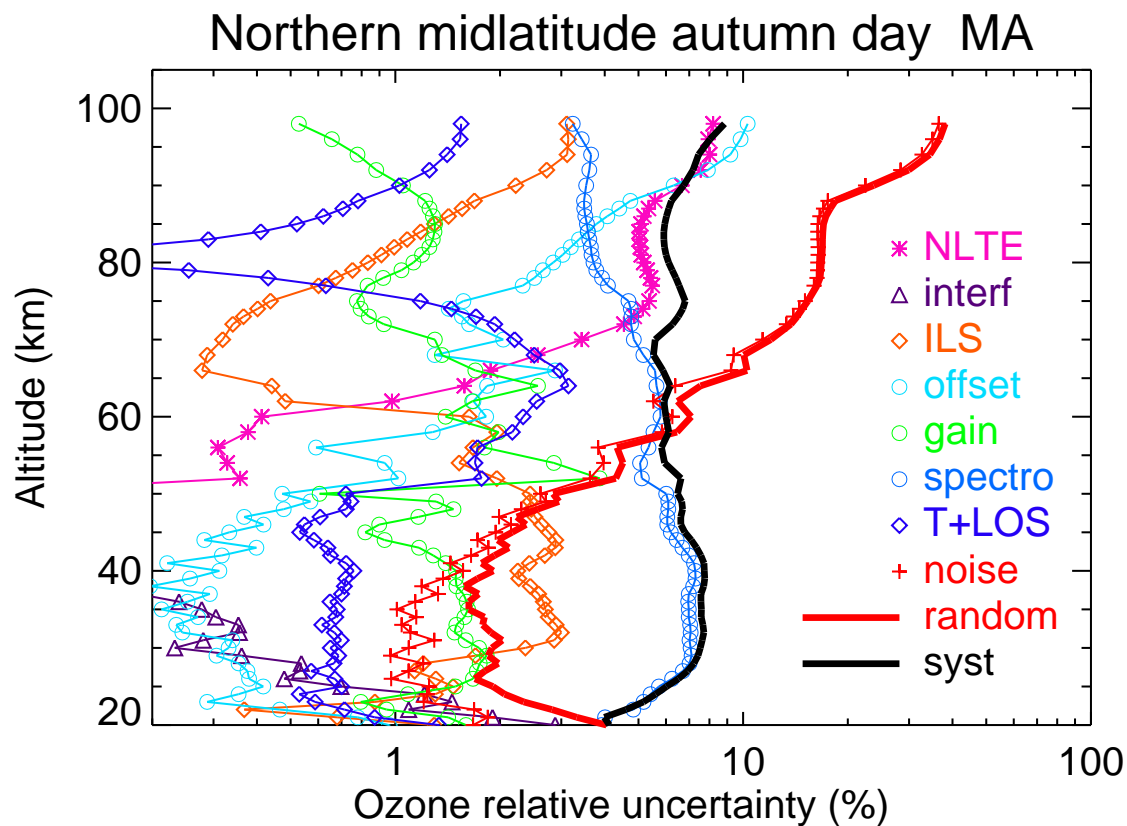

**Figure S15.** V8R\_O3\_561 Northern midlatitude autumn day.

**Table S17.** Ozone error budget for Northern midlatitude autumn night, MA. All uncertainties are  $1\sigma$ .

| altitude<br>(km) | mean O <sub>3</sub> vmr<br>(ppmv) | NLTE<br>(%) | interf<br>(%) | ILS<br>(%) | offset<br>(%) | gain<br>(%) | spectro<br>(%) | T+LOS<br>(%) | noise<br>(%) | random<br>(%) | syst<br>(%) |
|------------------|-----------------------------------|-------------|---------------|------------|---------------|-------------|----------------|--------------|--------------|---------------|-------------|
| 20               | 2.3                               | <0.1        | 2.8           | 1.1        | 1.0           | 1.6         | 4.3            | 1.3          | 1.7          | 4.2           | 4.2         |
| 30               | 6.8                               | <0.1        | 0.2           | 2.4        | 0.3           | 1.7         | 7.4            | 0.7          | 1.1          | 1.8           | 7.9         |
| 40               | 7.2                               | <0.1        | 0.1           | 2.3        | 0.3           | 1.5         | 7.4            | 0.7          | 1.6          | 2.0           | 7.8         |
| 50               | 2.9                               | <0.1        | 0.1           | 2.4        | 0.5           | 0.9         | 6.0            | 0.7          | 2.8          | 3.1           | 6.5         |
| 60               | 1.4                               | 0.4         | <0.1          | 1.4        | 1.8           | 1.6         | 4.3            | 2.5          | 5.5          | 6.4           | 4.6         |
| 70               | 1.0                               | 2.3         | <0.1          | 1.0        | 3.0           | 1.8         | 4.6            | 4.5          | 9.4          | 11            | 4.8         |
| 80               | 0.4                               | 4.1         | <0.1          | 0.6        | 1.4           | 1.6         | 3.6            | 0.5          | 14           | 15            | 4.9         |
| 90               | 11                                | 6.3         | <0.1          | 0.9        | 2.2           | 1.6         | 2.9            | 1.6          | 11           | 12            | 6.6         |
| 96               | 12                                | 7.3         | <0.1          | 1.7        | 2.7           | 1.1         | 2.7            | 2.2          | 13           | 14            | 7.6         |
| 100              | 8.7                               | 7.1         | <0.1          | 2.9        | 5.1           | 0.9         | 2.7            | 2.1          | 21           | 22            | 7.3         |

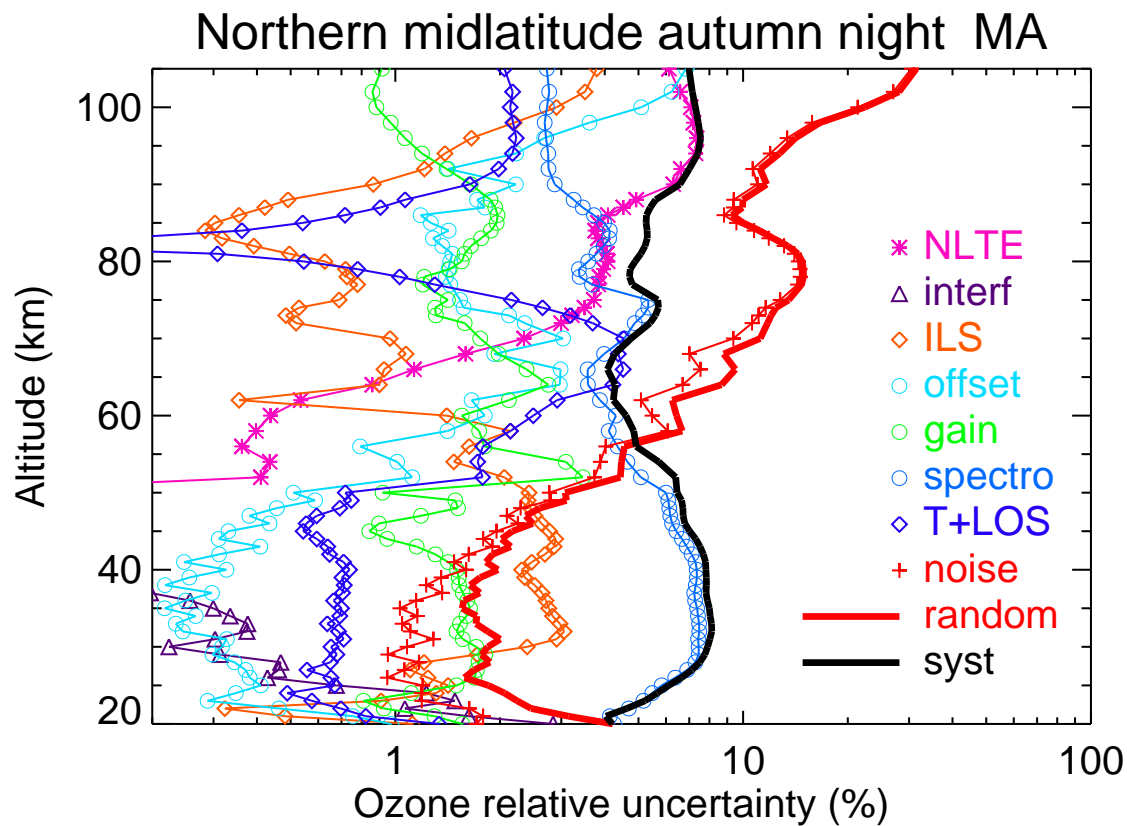

**Figure S16.** V8R\_O3\_561 Northern midlatitude autumn night.

**Table S18.** Ozone error budget for Tropics day, MA. All uncertainties are  $1\sigma$ .

| altitude<br>(km) | mean O <sub>3</sub> vmr<br>(ppmv) | NLTE<br>(%) | interf<br>(%) | ILS<br>(%) | offset<br>(%) | gain<br>(%) | spectro<br>(%) | T+LOS<br>(%) | noise<br>(%) | random<br>(%) | syst<br>(%) |
|------------------|-----------------------------------|-------------|---------------|------------|---------------|-------------|----------------|--------------|--------------|---------------|-------------|
| 20               | 1.0                               | <0.1        | 2.8           | 1.8        | 1.1           | 0.4         | 9.1            | 1.9          | 3.7          | 5.3           | 9.2         |
| 30               | 11                                | <0.1        | 0.2           | 2.3        | 0.3           | 1.8         | 6.8            | 0.7          | 1.0          | 1.4           | 7.4         |
| 40               | 6.7                               | <0.1        | 0.2           | 2.0        | 0.3           | 1.6         | 6.9            | 0.7          | 1.3          | 1.7           | 7.3         |
| 50               | 2.6                               | <0.1        | 0.1           | 2.4        | 0.4           | 0.5         | 5.3            | 0.6          | 2.2          | 2.4           | 5.8         |
| 60               | 1.1                               | 0.2         | <0.1          | 1.8        | 1.6           | 0.8         | 5.6            | 2.2          | 6.3          | 7.0           | 5.8         |
| 70               | 0.2                               | 5.1         | <0.1          | 0.4        | 1.3           | 0.9         | 6.4            | 2.5          | 12           | 12            | 8.1         |
| 80               | 0.2                               | 6.1         | <0.1          | 0.6        | 2.3           | 1.2         | 3.4            | 0.1          | 16           | 16            | 6.9         |
| 90               | 1.0                               | 6.7         | <0.1          | 2.2        | 4.8           | 1.0         | 3.3            | 1.3          | 19           | 20            | 7.0         |
| 96               | 0.7                               | 11          | <0.1          | 3.6        | 9.3           | 0.9         | 3.9            | 1.7          | 33           | 36            | 9.0         |
| 100              | 0.7                               | 10          | <0.1          | 3.5        | 10            | 0.7         | 3.4            | 1.6          | 37           | 38            | 10          |

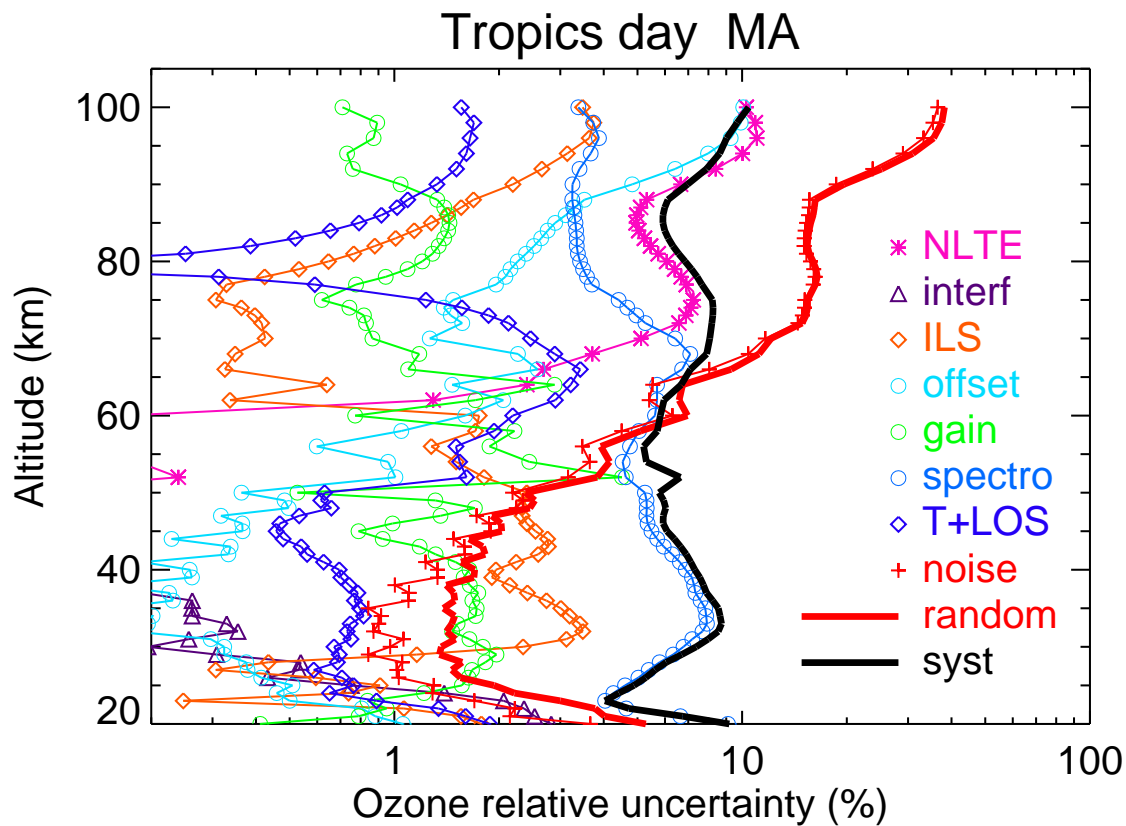

**Figure S17.** V8R\_O3\_561 Tropics day.

**Table S19.** Ozone error budget for Tropics night, MA. All uncertainties are  $1\sigma$ .

| altitude<br>(km) | mean O <sub>3</sub> vmr<br>(ppmv) | NLTE<br>(%) | interf<br>(%) | ILS<br>(%) | offset<br>(%) | gain<br>(%) | spectro<br>(%) | T+LOS<br>(%) | noise<br>(%) | random<br>(%) | syst<br>(%) |
|------------------|-----------------------------------|-------------|---------------|------------|---------------|-------------|----------------|--------------|--------------|---------------|-------------|
| 20               | 1.0                               | <0.1        | 2.5           | 1.7        | 1.0           | 0.4         | 8.7            | 1.8          | 3.6          | 5.0           | 8.8         |
| 30               | 11                                | <0.1        | 0.2           | 2.2        | 0.3           | 1.8         | 6.7            | 0.7          | 0.9          | 1.3           | 7.3         |
| 40               | 6.7                               | <0.1        | 0.2           | 2.0        | 0.3           | 1.6         | 7.0            | 0.7          | 1.4          | 1.8           | 7.4         |
| 50               | 2.8                               | <0.1        | 0.1           | 2.4        | 0.4           | 0.9         | 5.0            | 0.6          | 2.4          | 2.6           | 5.5         |
| 60               | 1.5                               | 0.2         | <0.1          | 1.6        | 1.6           | 1.0         | 4.3            | 2.2          | 5.3          | 6.0           | 4.6         |
| 70               | 1.1                               | 5.2         | <0.1          | 1.6        | 2.4           | 1.3         | 4.8            | 5.0          | 9.3          | 11            | 7.0         |
| 80               | 0.5                               | 5.9         | <0.1          | 0.6        | 1.3           | 2.1         | 3.6            | <0.1         | 13           | 14            | 6.8         |
| 90               | 8.9                               | 7.5         | <0.1          | 0.9        | 2.6           | 1.6         | 2.8            | 2.1          | 11           | 12            | 7.9         |
| 96               | 14                                | 11          | <0.1          | 0.8        | 2.8           | 1.1         | 2.6            | 2.7          | 12           | 13            | 11          |
| 100              | 11                                | 10          | <0.1          | 1.9        | 4.3           | 0.7         | 2.8            | 2.2          | 17           | 18            | 9.3         |

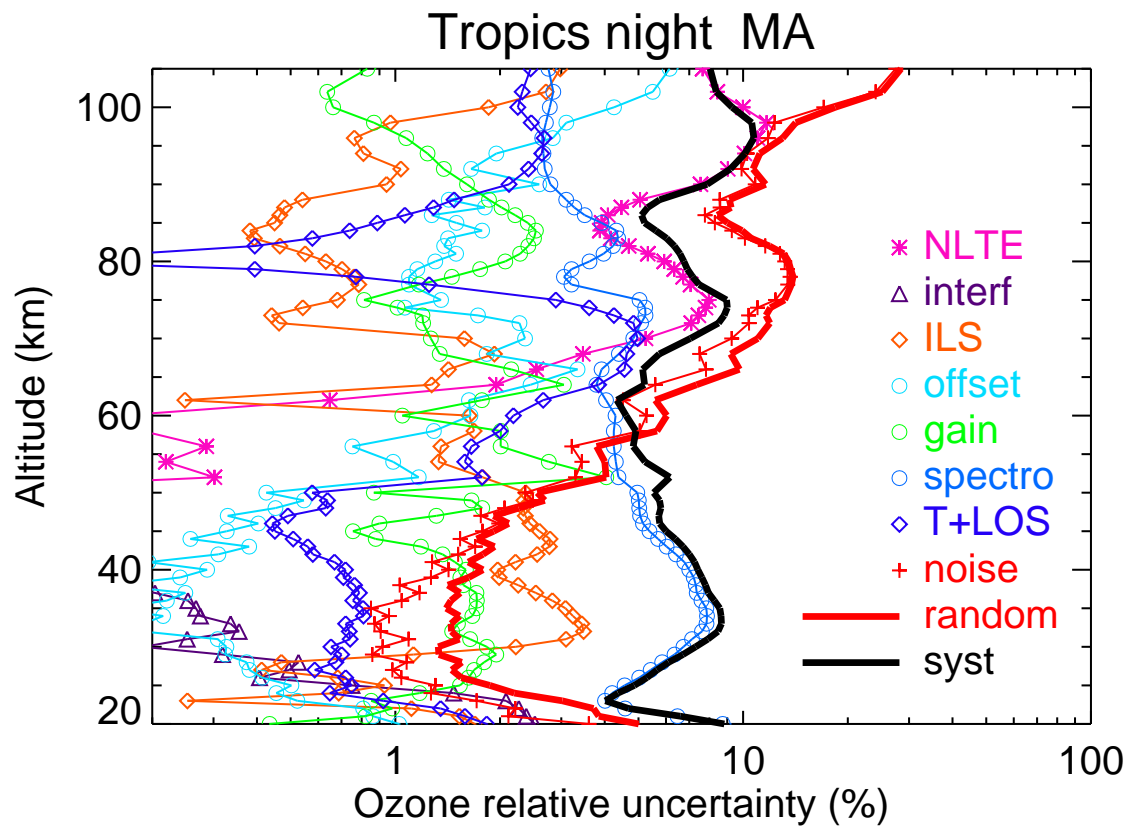

**Figure S18.** V8R\_O3\_561 Tropics night.

**Table S20.** Ozone error budget for Southern midlatitude winter day, MA. All uncertainties are  $1\sigma$ .

| altitude<br>(km) | mean O <sub>3</sub> vmr<br>(ppmv) | NLTE<br>(%) | interf<br>(%) | ILS<br>(%) | offset<br>(%) | gain<br>(%) | spectro<br>(%) | T+LOS<br>(%) | noise<br>(%) | random<br>(%) | syst<br>(%) |
|------------------|-----------------------------------|-------------|---------------|------------|---------------|-------------|----------------|--------------|--------------|---------------|-------------|
| 20               | 3.2                               | <0.1        | 3.0           | 1.7        | 0.9           | 1.5         | 4.5            | 1.4          | 1.5          | 4.5           | 4.5         |
| 30               | 7.3                               | <0.1        | 0.3           | 2.0        | 0.3           | 1.8         | 7.4            | 0.7          | 1.0          | 2.2           | 7.7         |
| 40               | 7.1                               | <0.1        | 0.1           | 2.6        | 0.3           | 1.3         | 7.6            | 0.8          | 1.6          | 2.3           | 8.0         |
| 50               | 2.6                               | <0.1        | 0.1           | 2.3        | 0.7           | 1.3         | 5.9            | 0.8          | 3.1          | 3.6           | 6.4         |
| 60               | 0.9                               | 0.9         | <0.1          | 1.1        | 1.6           | 2.0         | 5.4            | 2.3          | 5.4          | 6.3           | 5.6         |
| 70               | 0.3                               | 5.5         | <0.1          | 0.4        | 2.1           | 1.1         | 5.5            | 2.8          | 13           | 14            | 7.2         |
| 80               | 0.1                               | 4.6         | <0.1          | 1.1        | 3.7           | 1.2         | 3.6            | 0.2          | 18           | 18            | 5.9         |
| 90               | 0.7                               | 6.0         | <0.1          | 2.3        | 7.6           | 1.1         | 3.4            | 1.2          | 26           | 27            | 6.4         |
| 96               | 0.5                               | 8.4         | <0.1          | 3.0        | 10            | 0.8         | 3.5            | 1.5          | 36           | 38            | 7.9         |

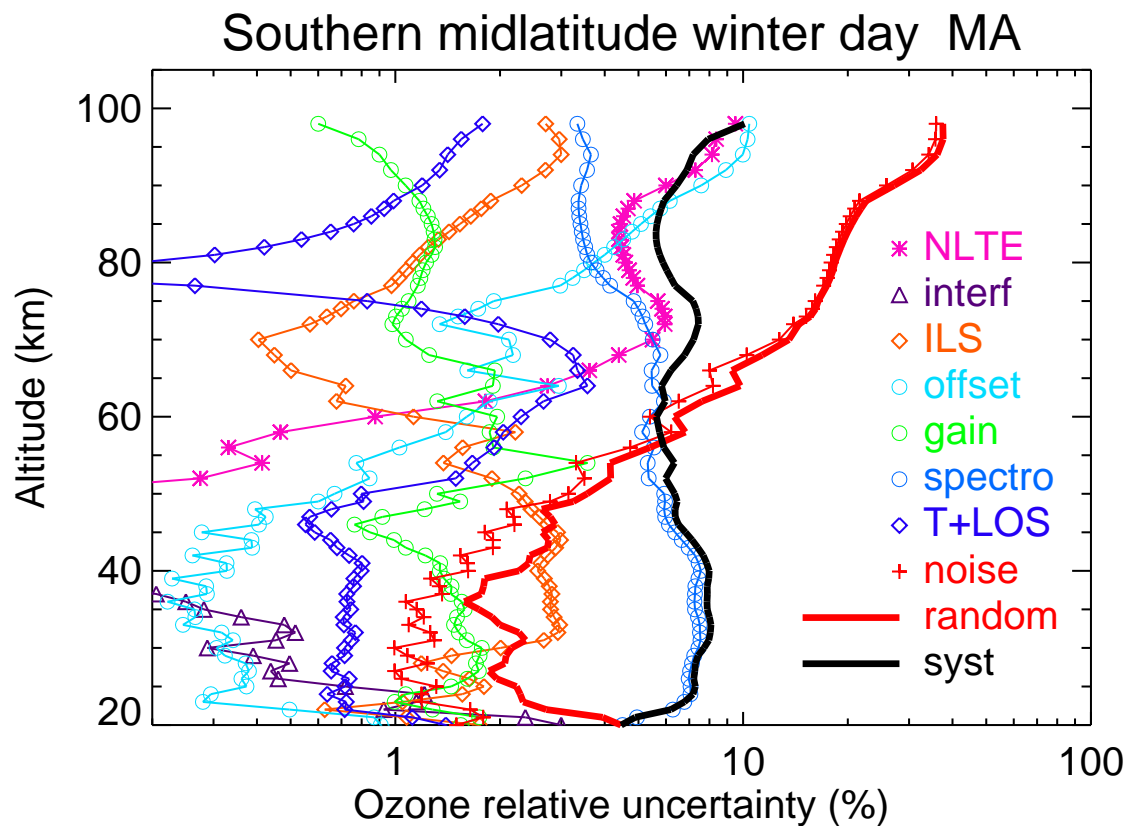

**Figure S19.** V8R\_O3\_561 Southern midlatitude winter day.

**Table S21.** Ozone error budget for Southern midlatitude winter night, MA. All uncertainties are  $1\sigma$ .

| altitude<br>(km) | mean O <sub>3</sub> vmr<br>(ppmv) | NLTE<br>(%) | interf<br>(%) | ILS<br>(%) | offset<br>(%) | gain<br>(%) | spectro<br>(%) | T+LOS<br>(%) | noise<br>(%) | random<br>(%) | syst<br>(%) |
|------------------|-----------------------------------|-------------|---------------|------------|---------------|-------------|----------------|--------------|--------------|---------------|-------------|
| 20               | 3.3                               | <0.1        | 2.8           | 1.6        | 1.0           | 1.8         | 3.9            | 1.6          | 1.6          | 4.1           | 4.2         |
| 30               | 6.3                               | <0.1        | 0.2           | 2.2        | 0.3           | 1.6         | 7.5            | 0.8          | 1.2          | 2.3           | 7.8         |
| 40               | 6.8                               | <0.1        | 0.1           | 2.9        | 0.4           | 1.2         | 7.9            | 0.9          | 1.8          | 2.7           | 8.4         |
| 50               | 2.3                               | 0.1         | 0.2           | 2.5        | 0.7           | 1.5         | 5.8            | 0.8          | 3.2          | 3.9           | 6.1         |
| 60               | 1.3                               | 0.8         | <0.1          | 1.2        | 1.5           | 2.1         | 3.8            | 2.2          | 4.8          | 5.7           | 4.3         |
| 70               | 1.0                               | 3.9         | <0.1          | 0.7        | 3.1           | 1.7         | 4.8            | 4.3          | 10           | 12            | 5.4         |
| 80               | 0.4                               | 3.5         | <0.1          | 0.5        | 1.3           | 1.6         | 3.3            | <0.1         | 14           | 14            | 4.3         |
| 90               | 5.5                               | 4.4         | <0.1          | 1.5        | 1.3           | 1.3         | 2.9            | 2.0          | 12           | 12            | 5.3         |
| 96               | 6.6                               | 5.5         | <0.1          | 2.8        | 3.7           | 1.2         | 2.7            | 2.0          | 16           | 17            | 5.9         |
| 100              | 4.1                               | 5.3         | <0.1          | 4.0        | 7.0           | 1.1         | 2.8            | 1.4          | 28           | 29            | 6.4         |

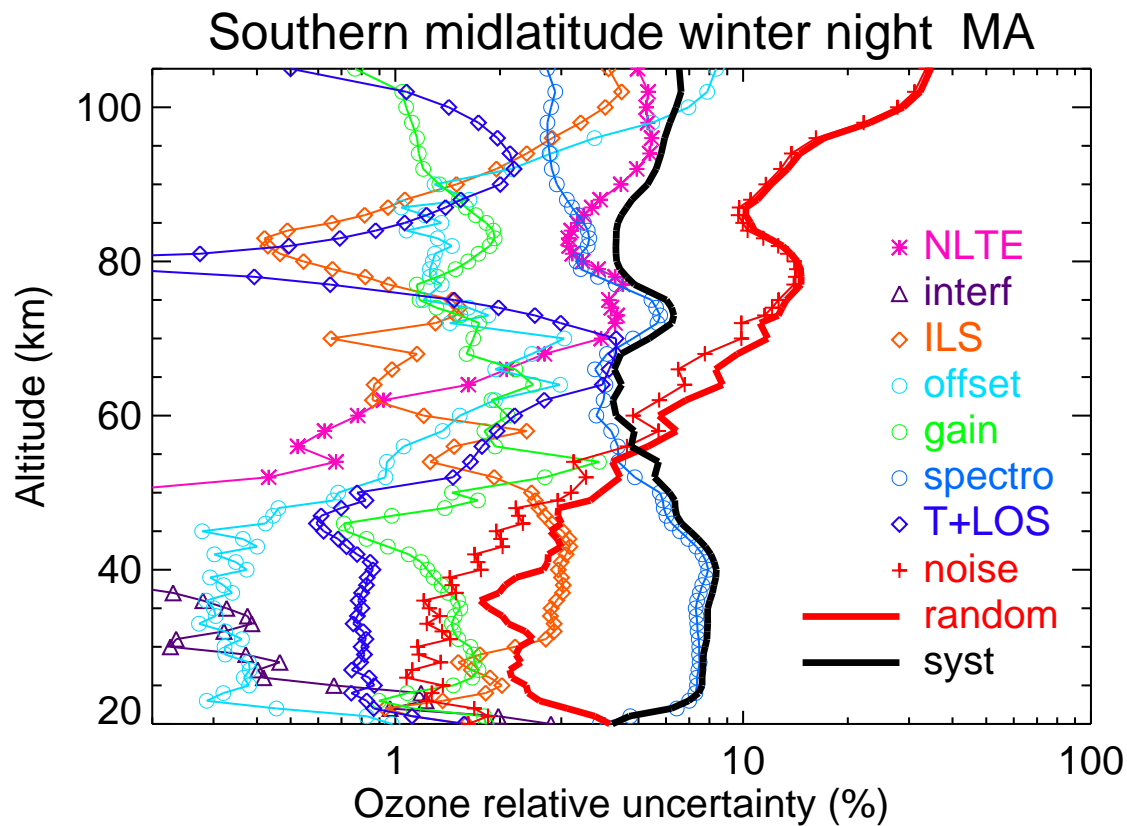

**Figure S20.** V8R\_O3\_561 Southern midlatitude winter night.

**Table S22.** Ozone error budget for Southern midlatitude spring day, MA. All uncertainties are  $1\sigma$ .

| altitude<br>(km) | mean O <sub>3</sub> vmr<br>(ppmv) | NLTE<br>(%) | interf<br>(%) | ILS<br>(%) | offset<br>(%) | gain<br>(%) | spectro<br>(%) | T+LOS<br>(%) | noise<br>(%) | random<br>(%) | syst<br>(%) |
|------------------|-----------------------------------|-------------|---------------|------------|---------------|-------------|----------------|--------------|--------------|---------------|-------------|
| 20               | 3.3                               | <0.1        | 3.9           | 2.3        | 1.0           | 2.2         | 4.0            | 1.4          | 1.6          | 5.0           | 4.6         |
| 30               | 7.9                               | <0.1        | 0.2           | 2.1        | 0.2           | 1.8         | 7.2            | 0.6          | 0.9          | 1.5           | 7.6         |
| 40               | 6.8                               | <0.1        | 0.1           | 2.3        | 0.3           | 1.5         | 7.1            | 0.7          | 1.5          | 2.3           | 7.4         |
| 50               | 2.6                               | <0.1        | 0.2           | 2.4        | 0.7           | 1.6         | 5.9            | 0.8          | 3.0          | 3.4           | 6.5         |
| 60               | 0.9                               | 0.4         | <0.1          | 1.3        | 1.4           | 2.1         | 5.2            | 2.1          | 4.7          | 5.4           | 5.6         |
| 70               | 0.3                               | 4.2         | <0.1          | 0.4        | 2.2           | 1.1         | 5.2            | 2.2          | 12           | 13            | 6.5         |
| 80               | 0.2                               | 5.8         | <0.1          | 0.8        | 2.3           | 1.1         | 3.7            | 0.2          | 15           | 15            | 6.8         |
| 90               | 0.7                               | 6.1         | <0.1          | 2.4        | 6.3           | 1.1         | 3.5            | 1.4          | 23           | 24            | 6.5         |
| 96               | 0.4                               | 7.8         | <0.1          | 3.5        | 10            | 0.8         | 3.6            | 1.8          | 36           | 38            | 7.5         |

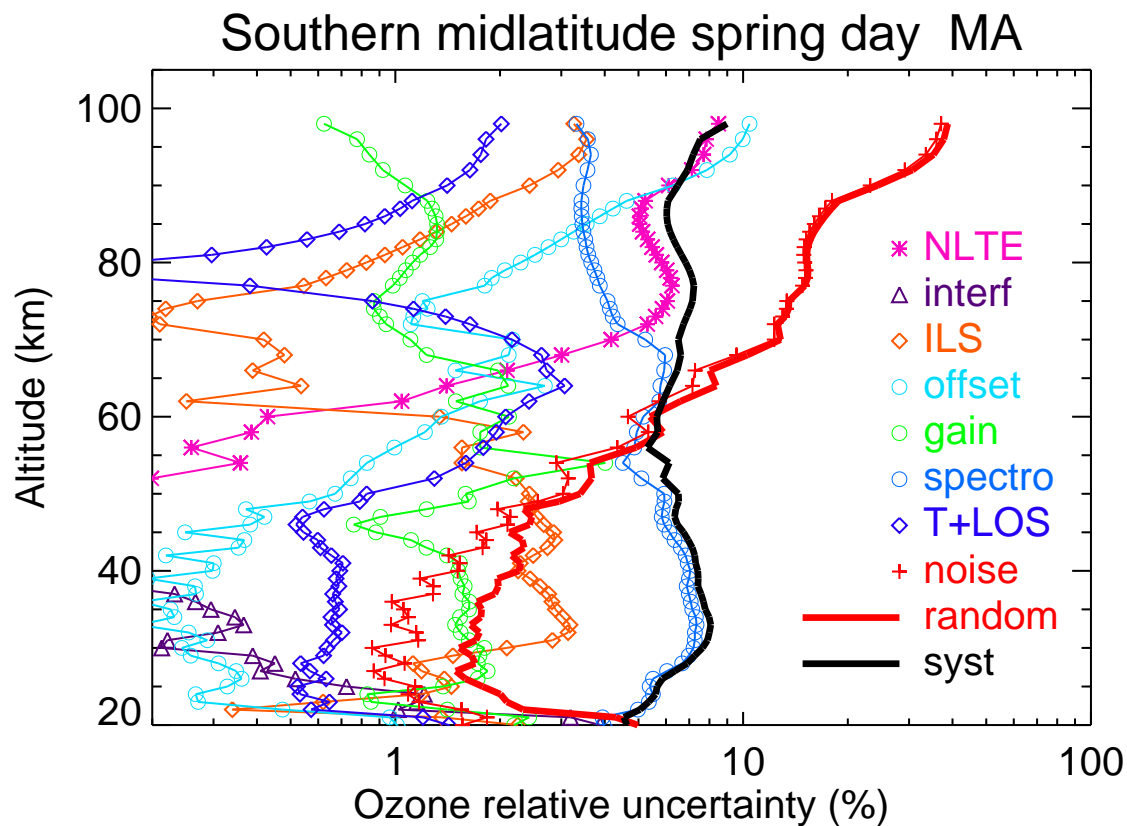

**Figure S21.** V8R\_O3\_561 Southern midlatitude spring day.

**Table S23.** Ozone error budget for Southern midlatitude spring night, MA. All uncertainties are  $1\sigma$ .

| altitude<br>(km) | mean O <sub>3</sub> vmr<br>(ppmv) | NLTE<br>(%) | interf<br>(%) | ILS<br>(%) | offset<br>(%) | gain<br>(%) | spectro<br>(%) | T+LOS<br>(%) | noise<br>(%) | random<br>(%) | syst<br>(%) |
|------------------|-----------------------------------|-------------|---------------|------------|---------------|-------------|----------------|--------------|--------------|---------------|-------------|
| 20               | 3.2                               | <0.1        | 3.8           | 1.5        | 1.2           | 1.9         | 4.3            | 1.6          | 1.8          | 4.9           | 4.6         |
| 30               | 8.2                               | <0.1        | 0.2           | 2.2        | 0.3           | 1.8         | 7.2            | 0.6          | 0.9          | 1.5           | 7.7         |
| 40               | 7.4                               | <0.1        | 0.1           | 2.1        | 0.3           | 1.6         | 7.4            | 0.7          | 1.5          | 2.2           | 7.7         |
| 50               | 2.8                               | <0.1        | 0.1           | 2.5        | 0.6           | 1.5         | 5.5            | 0.7          | 2.8          | 3.1           | 6.1         |
| 60               | 1.4                               | 0.4         | <0.1          | 1.2        | 1.6           | 1.7         | 4.1            | 2.2          | 4.5          | 5.4           | 4.5         |
| 70               | 1.2                               | 2.8         | <0.1          | 1.3        | 3.4           | 1.7         | 4.4            | 4.4          | 9.3          | 11            | 5.1         |
| 80               | 0.2                               | 5.0         | <0.1          | 0.8        | 1.4           | 1.5         | 3.6            | 0.2          | 14           | 15            | 5.4         |
| 90               | 8.3                               | 5.6         | <0.1          | 1.3        | 1.2           | 1.6         | 3.0            | 2.8          | 10           | 11            | 6.1         |
| 96               | 13                                | 7.9         | <0.1          | 1.8        | 2.2           | 1.2         | 2.7            | 3.4          | 11           | 13            | 7.7         |
| 100              | 9.3                               | 6.5         | <0.1          | 2.9        | 4.9           | 0.9         | 2.7            | 2.9          | 20           | 21            | 6.9         |

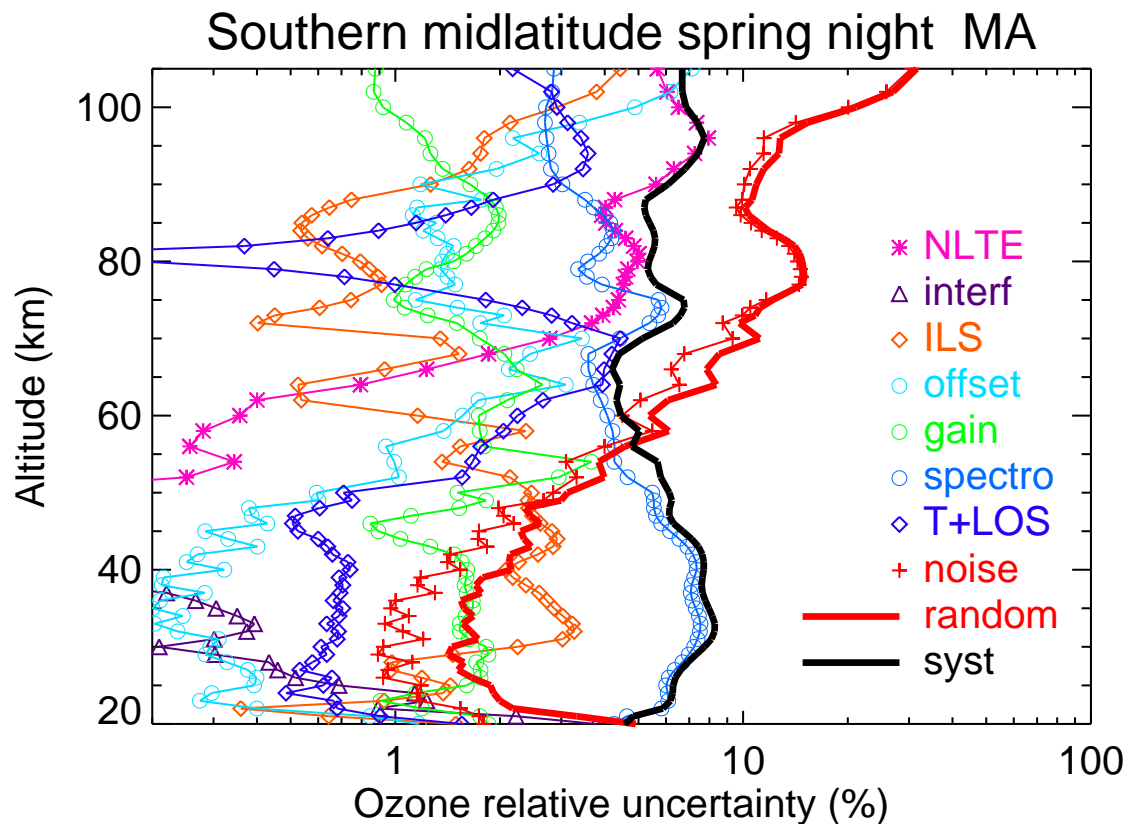

**Figure S22.** V8R\_O3\_561 Southern midlatitude spring night.



**Table S24.** Ozone error budget for Southern midlatitude summer day, MA. All uncertainties are  $1\sigma$ .

| altitude<br>(km) | mean O <sub>3</sub> vmr<br>(ppmv) | NLTE<br>(%) | interf<br>(%) | ILS<br>(%) | offset<br>(%) | gain<br>(%) | spectro<br>(%) | T+LOS<br>(%) | noise<br>(%) | random<br>(%) | syst<br>(%) |
|------------------|-----------------------------------|-------------|---------------|------------|---------------|-------------|----------------|--------------|--------------|---------------|-------------|
| 20               | 2.1                               | <0.1        | 2.3           | 0.6        | 1.0           | 1.6         | 4.5            | 1.2          | 1.9          | 3.7           | 4.5         |
| 30               | 7.1                               | <0.1        | 0.3           | 2.8        | 0.3           | 1.7         | 6.6            | 0.6          | 1.1          | 1.7           | 7.3         |
| 40               | 6.2                               | <0.1        | 0.2           | 1.8        | 0.2           | 1.6         | 6.5            | 0.6          | 1.3          | 1.5           | 6.9         |
| 50               | 2.6                               | <0.1        | 0.1           | 2.4        | 0.4           | 0.9         | 5.1            | 0.6          | 2.1          | 2.5           | 5.6         |
| 60               | 1.1                               | 0.2         | <0.1          | 1.6        | 1.5           | 1.2         | 5.5            | 2.1          | 5.1          | 6.0           | 5.6         |
| 70               | 0.3                               | 5.2         | <0.1          | 0.8        | 2.5           | 0.9         | 6.8            | 2.2          | 11           | 12            | 8.3         |
| 80               | 0.1                               | 6.6         | <0.1          | 0.6        | 2.3           | 0.8         | 3.6            | 0.9          | 16           | 16            | 7.3         |
| 90               | 1.1                               | 7.9         | <0.1          | 2.3        | 4.8           | 0.9         | 3.3            | 1.7          | 18           | 19            | 8.2         |
| 96               | 0.7                               | 11          | <0.1          | 3.6        | 9.4           | 0.9         | 3.7            | 1.9          | 34           | 36            | 10          |
| 100              | 0.5                               | 12          | <0.1          | 3.5        | 11            | 0.6         | 3.3            | 1.8          | 37           | 39            | 13          |

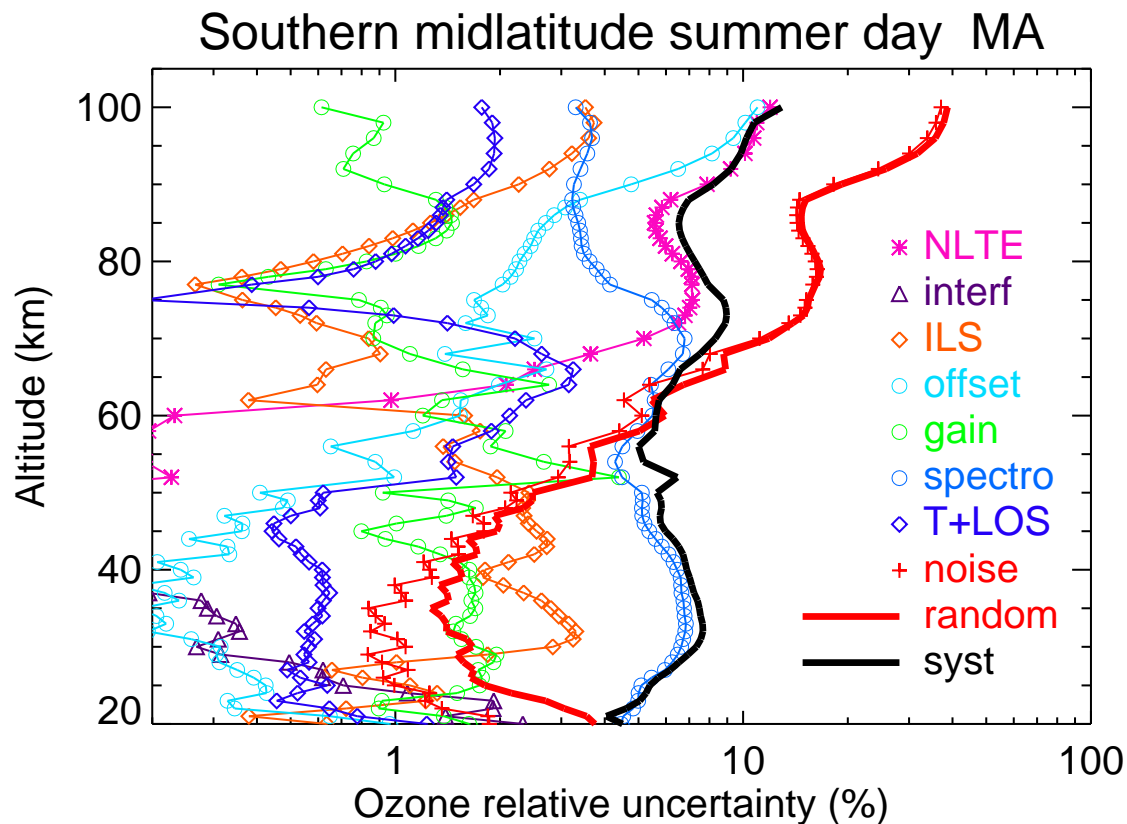

**Figure S23.** V8R\_O3\_561 Southern midlatitude summer day.

**Table S25.** Ozone error budget for Southern midlatitude summer night, MA. All uncertainties are  $1\sigma$ .

| altitude<br>(km) | mean O <sub>3</sub> vmr<br>(ppmv) | NLTE<br>(%) | interf<br>(%) | ILS<br>(%) | offset<br>(%) | gain<br>(%) | spectro<br>(%) | T+LOS<br>(%) | noise<br>(%) | random<br>(%) | syst<br>(%) |
|------------------|-----------------------------------|-------------|---------------|------------|---------------|-------------|----------------|--------------|--------------|---------------|-------------|
| 20               | 2.1                               | <0.1        | 2.5           | 0.6        | 0.9           | 1.3         | 4.4            | 1.2          | 1.7          | 3.6           | 4.4         |
| 30               | 7.1                               | <0.1        | 0.3           | 2.7        | 0.3           | 1.8         | 6.7            | 0.5          | 1.0          | 1.6           | 7.3         |
| 40               | 6.1                               | <0.1        | 0.2           | 1.7        | 0.3           | 1.7         | 6.5            | 0.6          | 1.3          | 1.6           | 6.9         |
| 50               | 2.7                               | <0.1        | 0.1           | 2.4        | 0.5           | 1.4         | 4.6            | 0.6          | 2.3          | 2.6           | 5.3         |
| 60               | 1.4                               | 0.3         | <0.1          | 1.4        | 1.5           | 1.9         | 4.5            | 2.0          | 4.0          | 5.0           | 4.8         |
| 70               | 1.2                               | 4.2         | <0.1          | 2.3        | 3.5           | 1.6         | 4.0            | 4.1          | 8.5          | 10            | 6.0         |
| 80               | 0.2                               | 6.3         | <0.1          | 0.9        | 1.5           | 1.3         | 3.3            | 1.1          | 14           | 15            | 6.8         |
| 90               | 4.0                               | 8.4         | <0.1          | 2.4        | 1.6           | 1.4         | 3.3            | 2.9          | 11           | 13            | 7.5         |
| 96               | 6.7                               | 9.1         | <0.1          | 1.7        | 3.1           | 0.9         | 3.0            | 2.0          | 14           | 15            | 8.9         |
| 100              | 4.5                               | 8.5         | <0.1          | 3.4        | 6.1           | 0.7         | 3.3            | 1.6          | 24           | 25            | 8.3         |

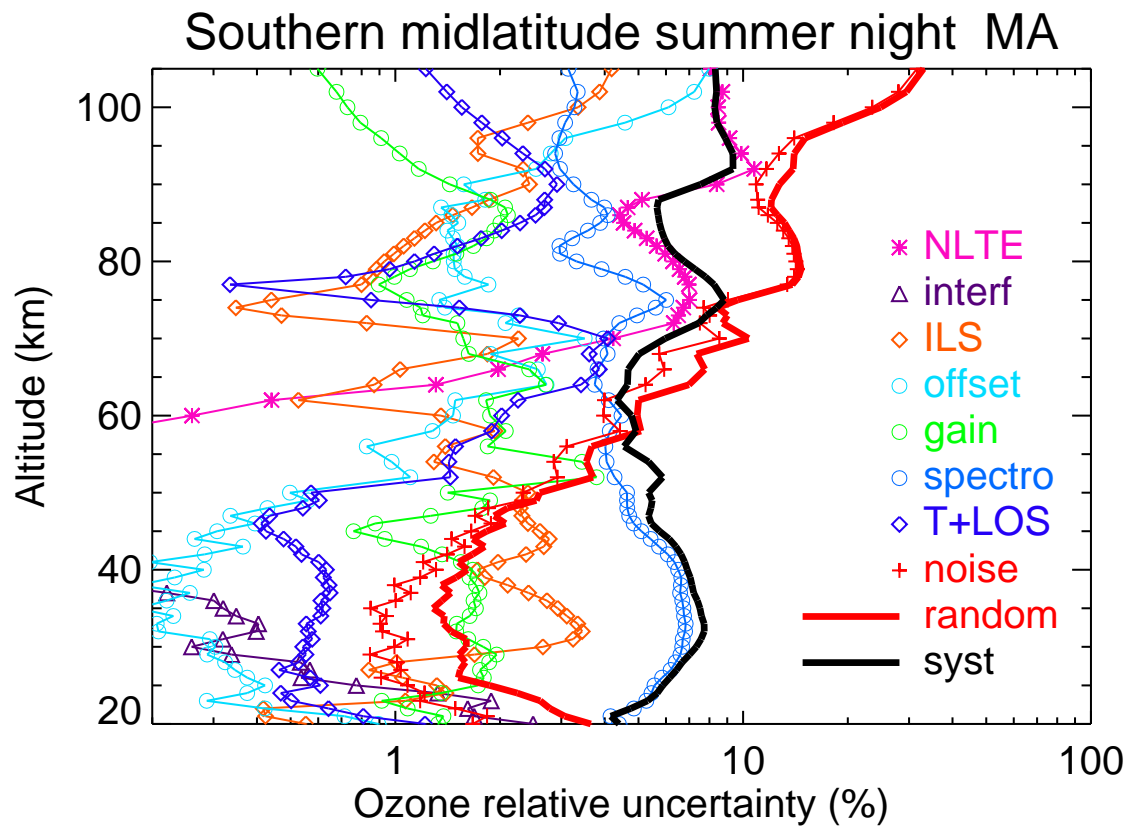

**Figure S24.** V8R\_O3\_561 Southern midlatitude summer night.

**Table S26.** Ozone error budget for Southern midlatitude autumn day, MA. All uncertainties are  $1\sigma$ .

| altitude<br>(km) | mean O <sub>3</sub> vmr<br>(ppmv) | NLTE<br>(%) | interf<br>(%) | ILS<br>(%) | offset<br>(%) | gain<br>(%) | spectro<br>(%) | T+LOS<br>(%) | noise<br>(%) | random<br>(%) | syst<br>(%) |
|------------------|-----------------------------------|-------------|---------------|------------|---------------|-------------|----------------|--------------|--------------|---------------|-------------|
| 20               | 2.1                               | <0.1        | 2.4           | 0.9        | 0.8           | 1.0         | 4.6            | 1.2          | 1.5          | 3.6           | 4.5         |
| 30               | 6.7                               | <0.1        | 0.2           | 2.2        | 0.3           | 1.8         | 7.5            | 0.7          | 1.0          | 1.7           | 7.9         |
| 40               | 7.0                               | <0.1        | 0.1           | 2.4        | 0.3           | 1.4         | 7.3            | 0.7          | 1.6          | 1.9           | 7.8         |
| 50               | 2.8                               | <0.1        | 0.1           | 2.4        | 0.6           | 1.3         | 6.3            | 0.8          | 3.1          | 3.3           | 6.8         |
| 60               | 0.9                               | 0.7         | <0.1          | 1.1        | 1.7           | 1.7         | 6.0            | 2.5          | 5.7          | 6.6           | 6.2         |
| 70               | 0.3                               | 2.9         | <0.1          | 0.3        | 2.4           | 1.4         | 5.1            | 2.3          | 12           | 13            | 5.8         |
| 80               | 0.1                               | 4.8         | <0.1          | 0.9        | 3.1           | 1.1         | 3.6            | <0.1         | 17           | 17            | 6.0         |
| 90               | 0.9                               | 6.9         | <0.1          | 2.3        | 6.7           | 1.1         | 3.4            | 1.0          | 24           | 25            | 7.1         |
| 96               | 0.5                               | 8.6         | <0.1          | 3.3        | 10            | 0.9         | 3.3            | 1.5          | 35           | 37            | 8.4         |

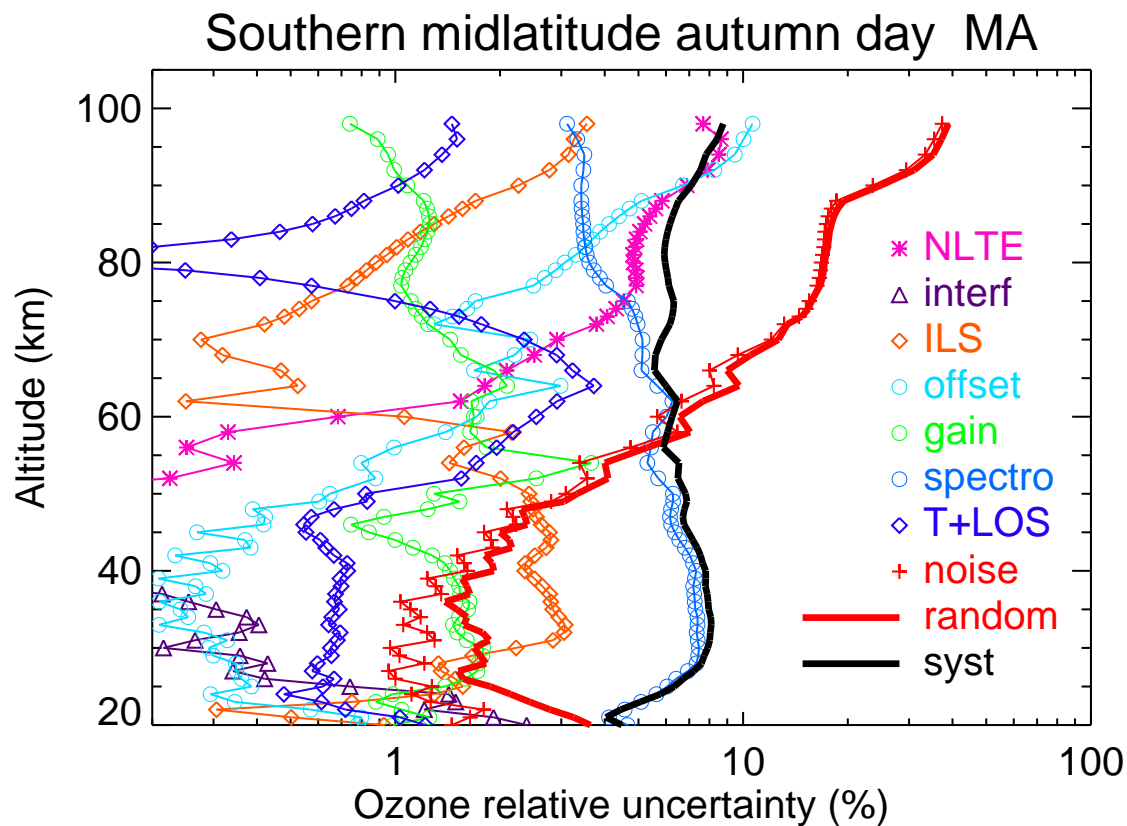

**Figure S25.** V8R\_O3\_561 Southern midlatitude autumn day.

**Table S27.** Ozone error budget for Southern midlatitude autumn night, MA. All uncertainties are  $1\sigma$ .

| altitude<br>(km) | mean O <sub>3</sub> vmr<br>(ppmv) | NLTE<br>(%) | interf<br>(%) | ILS<br>(%) | offset<br>(%) | gain<br>(%) | spectro<br>(%) | T+LOS<br>(%) | noise<br>(%) | random<br>(%) | syst<br>(%) |
|------------------|-----------------------------------|-------------|---------------|------------|---------------|-------------|----------------|--------------|--------------|---------------|-------------|
| 20               | 2.1                               | <0.1        | 2.5           | 1.0        | 0.8           | 1.1         | 4.5            | 1.3          | 1.5          | 3.7           | 4.4         |
| 30               | 6.5                               | <0.1        | 0.2           | 2.2        | 0.3           | 1.7         | 7.1            | 0.7          | 1.0          | 1.5           | 7.6         |
| 40               | 7.0                               | <0.1        | 0.1           | 2.3        | 0.3           | 1.4         | 7.0            | 0.7          | 1.6          | 1.9           | 7.5         |
| 50               | 2.9                               | <0.1        | 0.1           | 2.3        | 0.6           | 1.4         | 5.8            | 0.8          | 3.1          | 3.3           | 6.4         |
| 60               | 1.4                               | 0.4         | <0.1          | 1.1        | 1.6           | 1.7         | 4.3            | 2.6          | 5.3          | 6.3           | 4.6         |
| 70               | 0.9                               | 1.8         | <0.1          | 0.6        | 3.2           | 1.9         | 5.2            | 4.3          | 10           | 11            | 5.3         |
| 80               | 0.2                               | 3.4         | <0.1          | 0.6        | 1.4           | 0.9         | 3.1            | 0.6          | 15           | 16            | 4.5         |
| 90               | 10                                | 6.8         | <0.1          | 0.9        | 1.1           | 1.6         | 3.0            | 1.8          | 10           | 11            | 7.0         |
| 96               | 11                                | 7.6         | <0.1          | 2.1        | 2.6           | 1.1         | 2.7            | 2.0          | 14           | 14            | 7.6         |
| 100              | 7.5                               | 6.5         | <0.1          | 3.3        | 5.6           | 0.9         | 2.8            | 1.9          | 23           | 24            | 6.7         |

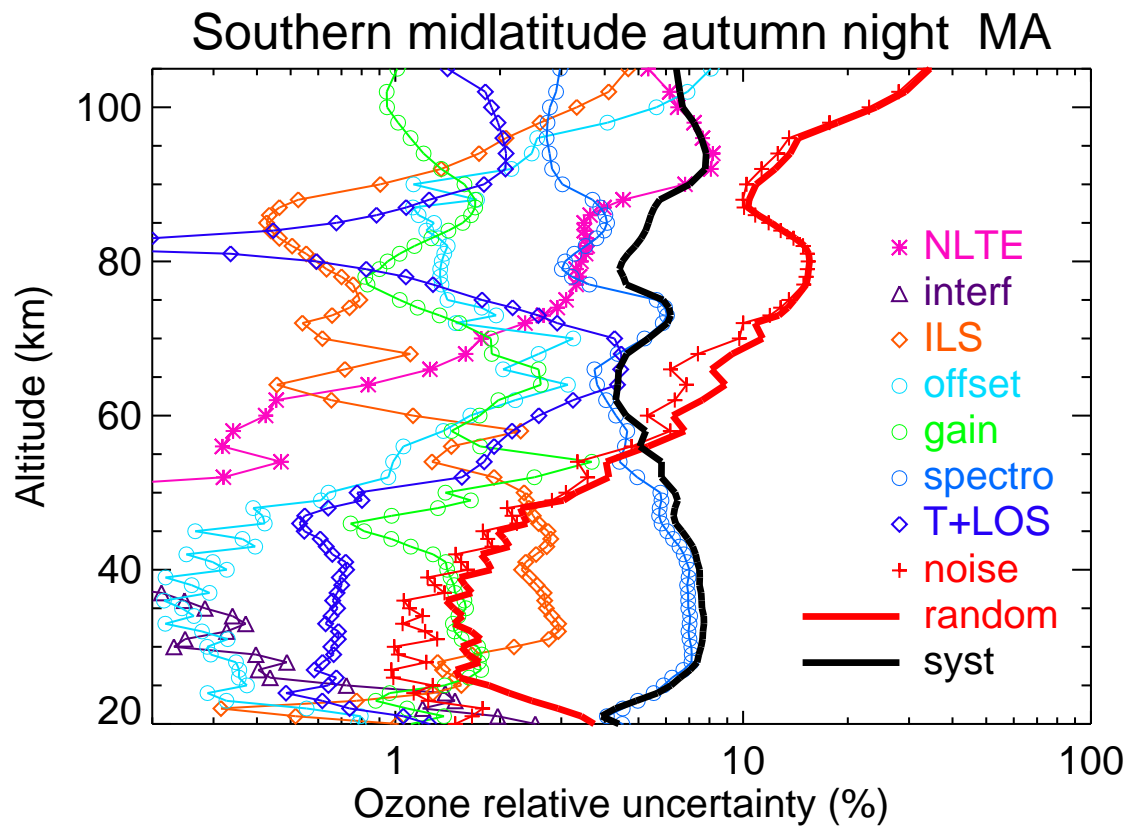

**Figure S26.** V8R\_O3\_561 Southern midlatitude autumn night.

**Table S28.** Ozone error budget for Southern polar winter day, MA. All uncertainties are  $1\sigma$ .

| altitude<br>(km) | mean O <sub>3</sub> vmr<br>(ppmv) | NLTE<br>(%) | interf<br>(%) | ILS<br>(%) | offset<br>(%) | gain<br>(%) | spectro<br>(%) | T+LOS<br>(%) | noise<br>(%) | random<br>(%) | syst<br>(%) |
|------------------|-----------------------------------|-------------|---------------|------------|---------------|-------------|----------------|--------------|--------------|---------------|-------------|
| 20               | 2.4                               | <0.1        | 2.9           | 2.5        | 0.8           | 1.8         | 6.9            | 1.8          | 1.9          | 5.5           | 6.6         |
| 30               | 5.0                               | <0.1        | 0.2           | 2.7        | 0.4           | 1.6         | 6.9            | 0.8          | 1.4          | 1.9           | 7.5         |
| 40               | 4.5                               | <0.1        | <0.1          | 3.0        | 0.3           | 0.9         | 6.3            | 0.7          | 1.7          | 2.5           | 6.8         |
| 50               | 1.7                               | 0.1         | 0.2           | 2.1        | 0.8           | 1.4         | 5.1            | 0.8          | 3.5          | 4.0           | 5.5         |
| 60               | 0.6                               | 0.8         | <0.1          | 1.9        | 1.4           | 1.8         | 4.9            | 1.9          | 5.7          | 6.4           | 5.3         |
| 70               | 0.2                               | 7.1         | <0.1          | 0.9        | 1.3           | 0.9         | 5.6            | 2.8          | 13           | 14            | 8.0         |
| 80               | 0.1                               | 4.1         | <0.1          | 1.0        | 3.3           | 1.3         | 3.4            | 0.2          | 17           | 18            | 5.3         |
| 90               | 0.7                               | 5.8         | <0.1          | 2.4        | 6.9           | 1.2         | 3.3            | 1.0          | 24           | 25            | 6.2         |
| 96               | 0.4                               | 7.6         | <0.1          | 3.3        | 10            | 1.0         | 3.3            | 1.2          | 36           | 38            | 7.8         |

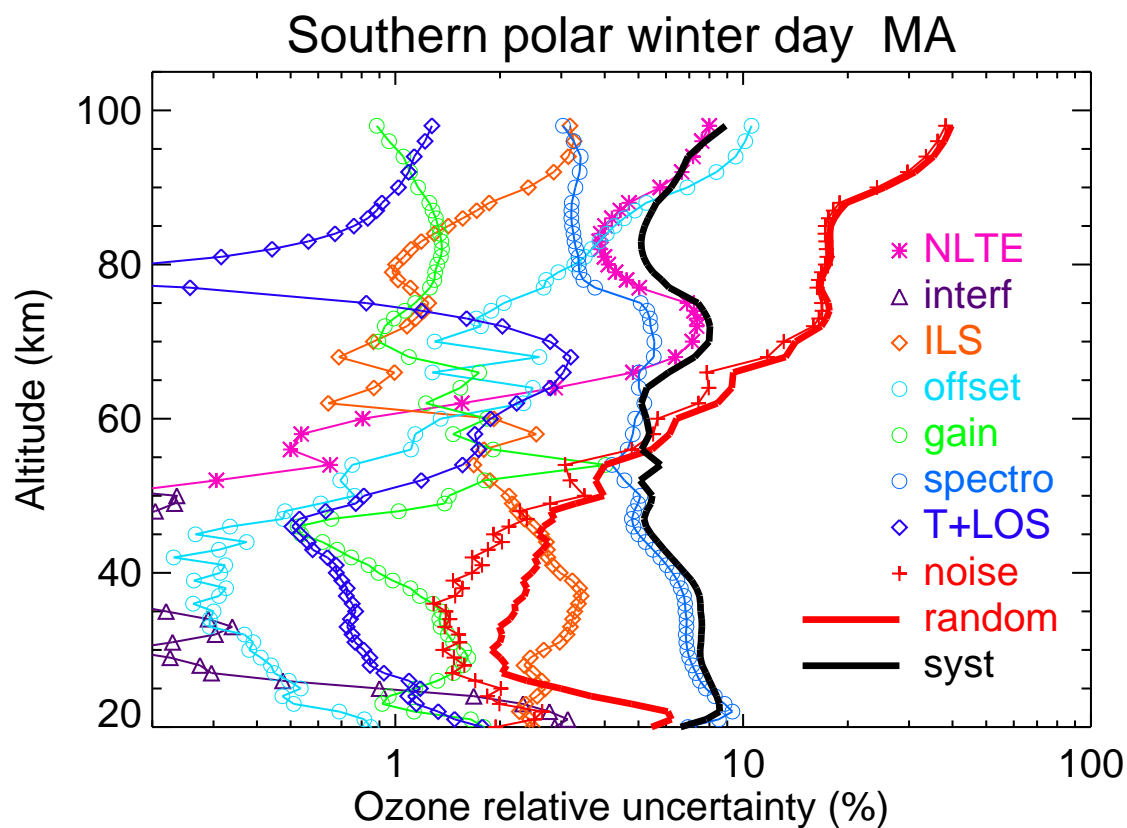

**Figure S27.** V8R\_O3\_561 Southern polar winter day.

**Table S29.** Ozone error budget for Southern polar winter night, MA. All uncertainties are  $1\sigma$ .

| altitude<br>(km) | mean O <sub>3</sub> vmr<br>(ppmv) | NLTE<br>(%) | interf<br>(%) | ILS<br>(%) | offset<br>(%) | gain<br>(%) | spectro<br>(%) | T+LOS<br>(%) | noise<br>(%) | random<br>(%) | syst<br>(%) |
|------------------|-----------------------------------|-------------|---------------|------------|---------------|-------------|----------------|--------------|--------------|---------------|-------------|
| 20               | 2.5                               | <0.1        | 2.4           | 1.9        | 0.9           | 2.0         | 4.6            | 1.7          | 1.9          | 4.5           | 4.7         |
| 30               | 5.3                               | <0.1        | 0.2           | 2.7        | 0.4           | 1.5         | 6.9            | 0.8          | 1.3          | 1.9           | 7.5         |
| 40               | 4.4                               | <0.1        | <0.1          | 3.1        | 0.3           | 0.9         | 6.5            | 0.7          | 1.6          | 2.7           | 7.0         |
| 50               | 1.8                               | 0.2         | 0.2           | 2.2        | 0.8           | 1.9         | 4.8            | 0.8          | 3.5          | 4.0           | 5.4         |
| 60               | 1.3                               | 0.8         | <0.1          | 1.9        | 1.4           | 2.4         | 3.6            | 1.8          | 5.3          | 6.0           | 4.5         |
| 70               | 1.3                               | 4.7         | <0.1          | 1.1        | 2.3           | 1.6         | 3.7            | 6.0          | 8.8          | 11            | 5.4         |
| 80               | 0.7                               | 4.8         | <0.1          | 0.9        | 1.2           | 2.4         | 4.0            | 1.2          | 12           | 12            | 5.1         |
| 90               | 7.1                               | 6.0         | <0.1          | 2.0        | 1.9           | 1.3         | 2.9            | 1.0          | 11           | 12            | 6.5         |
| 96               | 6.2                               | 5.5         | <0.1          | 3.7        | 3.6           | 1.2         | 2.7            | 1.8          | 16           | 16            | 6.4         |
| 100              | 3.6                               | 5.4         | <0.1          | 5.3        | 6.7           | 1.2         | 2.7            | 2.2          | 27           | 28            | 7.2         |

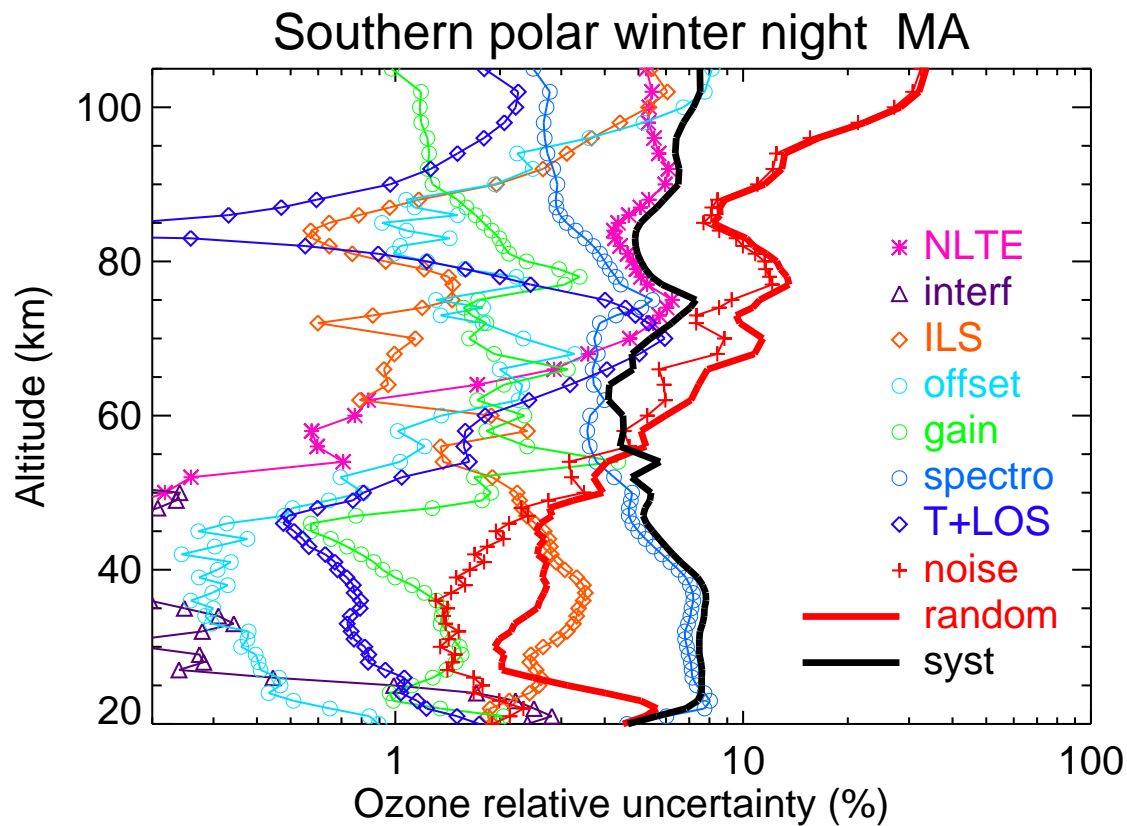

**Figure S28.** V8R\_O3\_561 Southern polar winter night.

**Table S30.** Ozone error budget for Southern polar spring day, MA. All uncertainties are  $1\sigma$ .

| altitude<br>(km) | mean O <sub>3</sub> vmr<br>(ppmv) | NLTE<br>(%) | interf<br>(%) | ILS<br>(%) | offset<br>(%) | gain<br>(%) | spectro<br>(%) | T+LOS<br>(%) | noise<br>(%) | random<br>(%) | syst<br>(%) |
|------------------|-----------------------------------|-------------|---------------|------------|---------------|-------------|----------------|--------------|--------------|---------------|-------------|
| 20               | 1.4                               | <0.1        | 5.5           | 3.7        | 1.3           | 2.7         | 7.0            | 1.6          | 3.0          | 9.4           | 5.1         |
| 30               | 6.8                               | <0.1        | 0.1           | 2.6        | 0.2           | 1.7         | 6.2            | 0.4          | 0.8          | 2.0           | 6.7         |
| 40               | 4.9                               | <0.1        | <0.1          | 2.1        | 0.3           | 1.5         | 5.9            | 0.5          | 1.4          | 2.8           | 6.0         |
| 50               | 2.6                               | <0.1        | 0.2           | 2.2        | 0.7           | 1.8         | 5.3            | 0.8          | 3.0          | 3.3           | 5.9         |
| 60               | 0.9                               | 0.3         | <0.1          | 1.6        | 1.2           | 2.4         | 5.1            | 1.9          | 4.7          | 5.4           | 5.8         |
| 70               | 0.3                               | 5.0         | <0.1          | 0.6        | 1.8           | 1.0         | 5.4            | 2.1          | 11           | 11            | 7.2         |
| 80               | 0.1                               | 6.2         | <0.1          | 0.7        | 2.0           | 1.2         | 3.6            | 0.5          | 15           | 16            | 6.8         |
| 90               | 0.9                               | 6.7         | <0.1          | 2.2        | 4.6           | 1.2         | 3.1            | 1.7          | 18           | 19            | 7.0         |
| 96               | 0.6                               | 13          | <0.1          | 3.5        | 8.7           | 0.9         | 3.8            | 2.1          | 33           | 36            | 10          |
| 100              | 0.7                               | 13          | <0.1          | 3.1        | 10            | 0.7         | 3.2            | 2.2          | 37           | 39            | 13          |

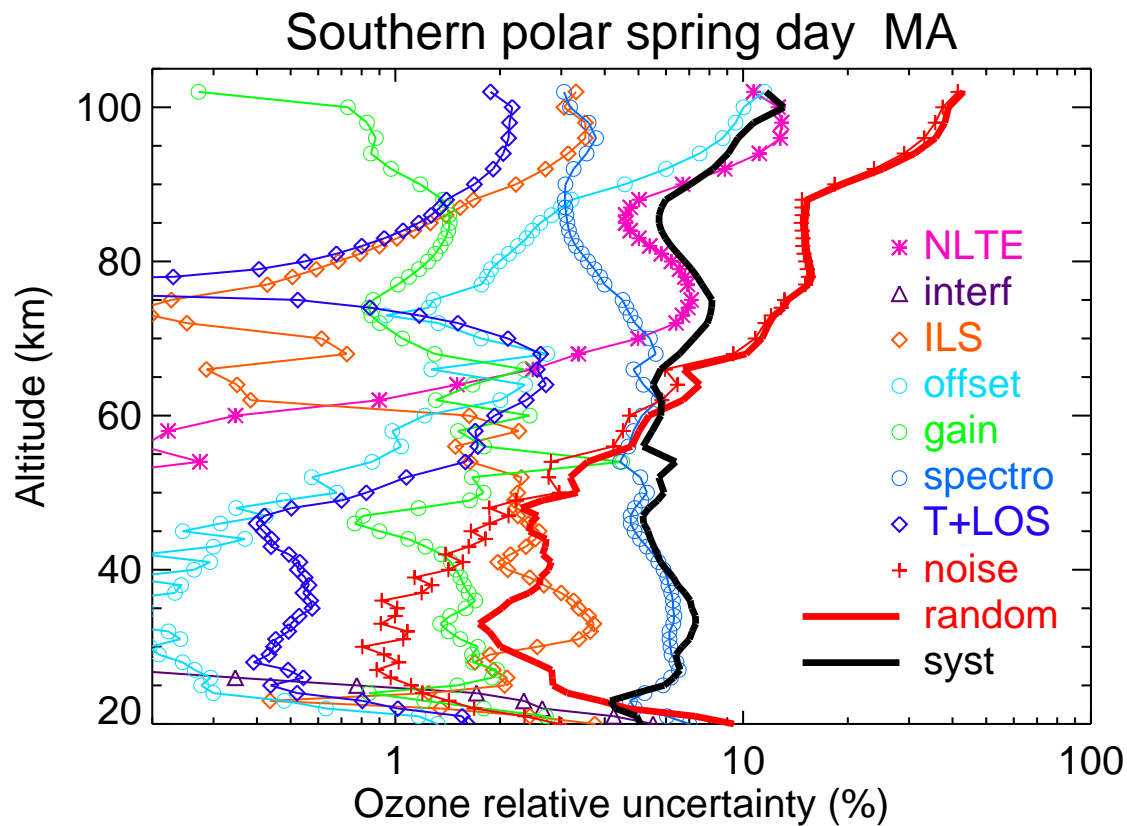

**Figure S29.** V8R\_O3\_561 Southern polar spring day.

**Table S31.** Ozone error budget for Southern polar spring night, MA. All uncertainties are  $1\sigma$ .

| altitude<br>(km) | mean O <sub>3</sub> vmr<br>(ppmv) | NLTE<br>(%) | interf<br>(%) | ILS<br>(%) | offset<br>(%) | gain<br>(%) | spectro<br>(%) | T+LOS<br>(%) | noise<br>(%) | random<br>(%) | syst<br>(%) |
|------------------|-----------------------------------|-------------|---------------|------------|---------------|-------------|----------------|--------------|--------------|---------------|-------------|
| 20               | 2.1                               | <0.1        | 5.3           | 2.6        | 1.4           | 2.5         | 6.0            | 1.6          | 2.2          | 8.0           | 4.7         |
| 30               | 7.3                               | <0.1        | 0.1           | 2.8        | 0.2           | 1.8         | 6.9            | 0.5          | 0.8          | 2.0           | 7.5         |
| 40               | 5.4                               | <0.1        | <0.1          | 2.0        | 0.3           | 1.6         | 6.4            | 0.6          | 1.5          | 2.6           | 6.6         |
| 50               | 2.7                               | <0.1        | 0.2           | 2.4        | 0.7           | 1.9         | 5.2            | 0.8          | 3.0          | 3.4           | 5.9         |
| 60               | 1.4                               | 0.3         | <0.1          | 1.5        | 1.4           | 2.3         | 4.0            | 2.1          | 4.7          | 5.4           | 4.7         |
| 70               | 1.2                               | 4.1         | <0.1          | 1.7        | 2.9           | 1.6         | 4.0            | 4.6          | 9.3          | 11            | 5.8         |
| 80               | 0.2                               | 4.8         | <0.1          | 0.7        | 1.2           | 1.6         | 3.2            | 0.2          | 14           | 14            | 5.6         |
| 90               | 7.1                               | 5.7         | <0.1          | 1.2        | 1.8           | 1.6         | 2.9            | 3.1          | 10           | 11            | 5.8         |
| 96               | 10                                | 7.0         | <0.1          | 1.6        | 2.7           | 1.1         | 2.8            | 3.7          | 12           | 13            | 6.8         |
| 100              | 5.6                               | 6.6         | <0.1          | 3.1        | 5.5           | 0.9         | 3.0            | 3.2          | 22           | 24            | 6.7         |

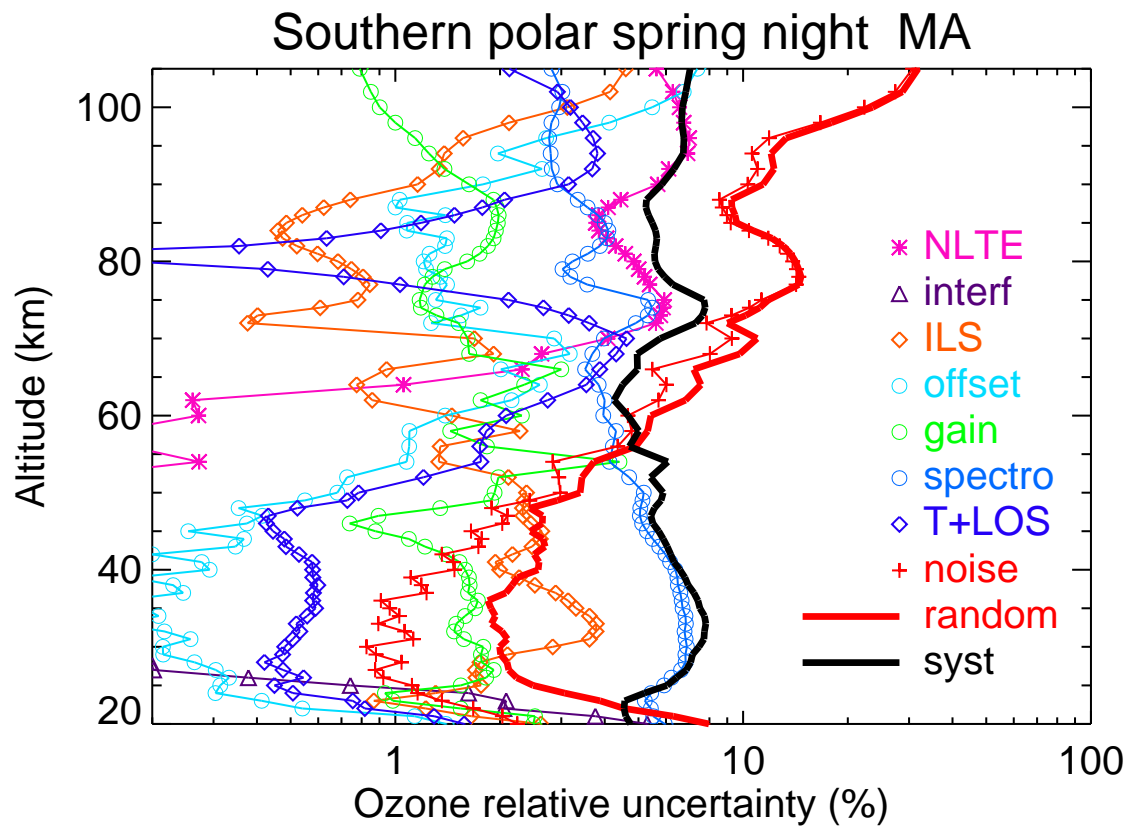

**Figure S30.** V8R\_O3\_561 Southern polar spring night.



**Table S32.** Ozone error budget for Southern polar summer day, MA. All uncertainties are  $1\sigma$ .

| altitude<br>(km) | mean O <sub>3</sub> vmr<br>(ppmv) | NLTE<br>(%) | interf<br>(%) | ILS<br>(%) | offset<br>(%) | gain<br>(%) | spectro<br>(%) | T+LOS<br>(%) | noise<br>(%) | random<br>(%) | syst<br>(%) |
|------------------|-----------------------------------|-------------|---------------|------------|---------------|-------------|----------------|--------------|--------------|---------------|-------------|
| 20               | 2.9                               | <0.1        | 4.1           | 1.7        | 0.9           | 2.1         | 4.1            | 1.3          | 1.6          | 4.9           | 4.7         |
| 30               | 4.4                               | <0.1        | 0.2           | 2.3        | 0.2           | 1.8         | 5.9            | 0.4          | 0.9          | 1.6           | 6.5         |
| 40               | 5.3                               | <0.1        | <0.1          | 1.9        | 0.3           | 1.7         | 5.5            | 0.5          | 1.2          | 1.5           | 6.0         |
| 50               | 2.3                               | <0.1        | 0.2           | 2.3        | 0.6           | 2.1         | 4.5            | 0.7          | 2.5          | 2.8           | 5.4         |
| 60               | 1.0                               | 0.2         | <0.1          | 1.6        | 1.1           | 3.0         | 4.1            | 1.8          | 3.5          | 4.2           | 5.3         |
| 70               | 0.3                               | 3.3         | <0.1          | 1.3        | 2.6           | 1.3         | 5.7            | 2.4          | 9.2          | 10            | 6.6         |
| 80               | 0.1                               | 7.5         | <0.1          | 0.7        | 2.5           | 0.6         | 4.3            | 1.7          | 16           | 16            | 8.0         |
| 90               | 0.8                               | 6.1         | <0.1          | 2.0        | 4.6           | 1.4         | 3.0            | 3.5          | 16           | 18            | 6.0         |
| 96               | 0.4                               | 8.9         | <0.1          | 3.6        | 8.3           | 1.0         | 3.6            | 3.4          | 31           | 33            | 8.4         |

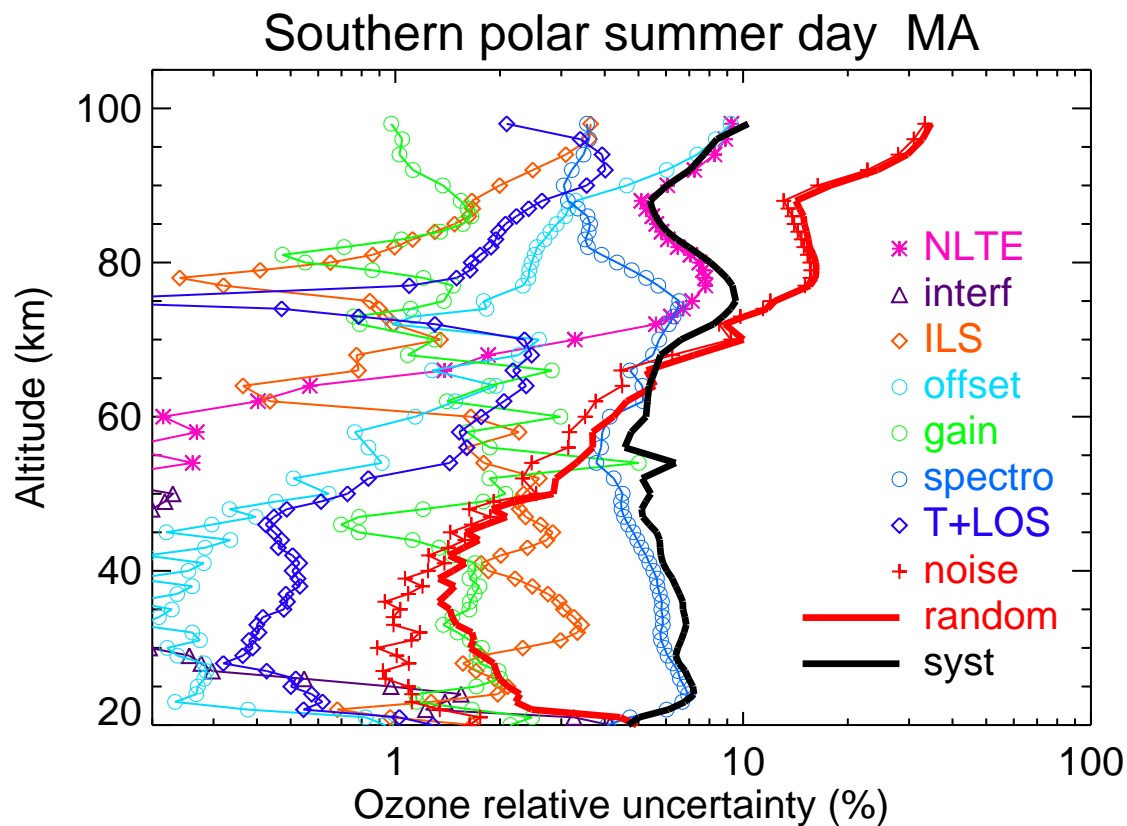

**Figure S31.** V8R\_O3\_561 Southern polar summer day.

**Table S33.** Ozone error budget for Southern polar summer night, MA. All uncertainties are  $1\sigma$ .

| altitude<br>(km) | mean O <sub>3</sub> vmr<br>(ppmv) | NLTE<br>(%) | interf<br>(%) | ILS<br>(%) | offset<br>(%) | gain<br>(%) | spectro<br>(%) | T+LOS<br>(%) | noise<br>(%) | random<br>(%) | syst<br>(%) |
|------------------|-----------------------------------|-------------|---------------|------------|---------------|-------------|----------------|--------------|--------------|---------------|-------------|
| 20               | 2.7                               | <0.1        | 3.6           | 1.9        | 0.9           | 1.8         | 4.1            | 1.2          | 1.5          | 4.6           | 4.5         |
| 30               | 5.3                               | <0.1        | 0.2           | 2.3        | 0.3           | 1.7         | 6.4            | 0.5          | 1.0          | 1.5           | 6.9         |
| 40               | 5.8                               | <0.1        | 0.1           | 2.0        | 0.3           | 1.6         | 6.3            | 0.6          | 1.4          | 1.6           | 6.8         |
| 50               | 2.6                               | <0.1        | 0.2           | 2.4        | 0.7           | 2.0         | 4.9            | 0.7          | 2.8          | 3.1           | 5.7         |
| 60               | 1.4                               | 0.2         | <0.1          | 1.5        | 1.3           | 2.2         | 4.0            | 1.9          | 4.2          | 4.9           | 4.7         |
| 70               | 1.1                               | 3.4         | <0.1          | 1.5        | 3.0           | 1.6         | 3.9            | 3.8          | 8.4          | 10            | 5.4         |
| 80               | 0.1                               | 5.7         | <0.1          | 1.0        | 1.7           | 1.1         | 3.3            | 1.1          | 15           | 15            | 6.5         |
| 90               | 3.7                               | 7.1         | <0.1          | 2.1        | 1.9           | 1.3         | 3.3            | 2.7          | 12           | 13            | 6.6         |
| 96               | 5.6                               | 7.8         | <0.1          | 2.2        | 4.2           | 1.0         | 3.0            | 2.1          | 17           | 18            | 7.7         |
| 100              | 2.7                               | 7.5         | <0.1          | 3.8        | 7.6           | 1.1         | 3.3            | 1.5          | 29           | 30            | 7.7         |

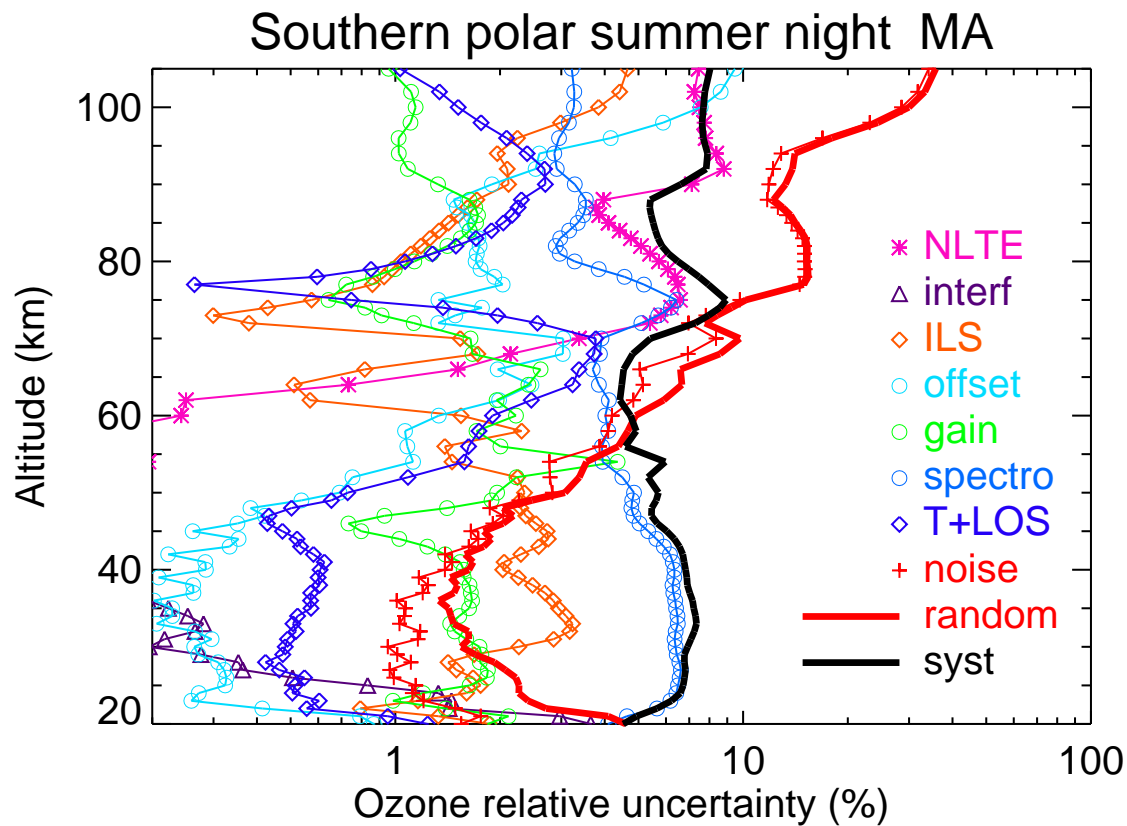

**Figure S32.** V8R\_O3\_561 Southern polar summer night.

**Table S34.** Ozone error budget for Southern polar autumn day, MA. All uncertainties are  $1\sigma$ .

| altitude<br>(km) | mean O <sub>3</sub> vmr<br>(ppmv) | NLTE<br>(%) | interf<br>(%) | ILS<br>(%) | offset<br>(%) | gain<br>(%) | spectro<br>(%) | T+LOS<br>(%) | noise<br>(%) | random<br>(%) | syst<br>(%) |
|------------------|-----------------------------------|-------------|---------------|------------|---------------|-------------|----------------|--------------|--------------|---------------|-------------|
| 20               | 2.9                               | <0.1        | 3.4           | 2.8        | 0.8           | 1.6         | 5.1            | 1.3          | 1.5          | 4.4           | 5.7         |
| 30               | 4.3                               | <0.1        | 0.2           | 2.5        | 0.3           | 1.7         | 8.1            | 0.7          | 1.3          | 2.5           | 8.4         |
| 40               | 5.6                               | <0.1        | <0.1          | 3.0        | 0.4           | 1.2         | 7.3            | 0.8          | 1.8          | 2.8           | 7.8         |
| 50               | 2.3                               | 0.2         | 0.2           | 2.4        | 0.8           | 1.2         | 6.8            | 1.0          | 3.6          | 3.9           | 7.3         |
| 60               | 0.7                               | 0.8         | <0.1          | 1.9        | 1.4           | 1.9         | 4.9            | 2.1          | 6.3          | 6.9           | 5.6         |
| 70               | 0.2                               | 2.5         | <0.1          | 0.9        | 1.3           | 1.2         | 6.3            | 2.2          | 14           | 14            | 6.6         |
| 80               | 0.1                               | 3.5         | <0.1          | 1.0        | 3.5           | 1.1         | 3.6            | <0.1         | 18           | 18            | 5.1         |
| 90               | 1.0                               | 6.6         | <0.1          | 1.9        | 6.3           | 1.2         | 3.7            | 0.8          | 22           | 23            | 6.8         |
| 96               | 0.8                               | 10          | <0.1          | 2.7        | 10            | 1.1         | 4.4            | 1.3          | 35           | 37            | 8.3         |
| 100              | 1.1                               | 7.6         | <0.1          | 2.0        | 11            | 1.1         | 3.6            | 1.4          | 38           | 40            | 8.5         |

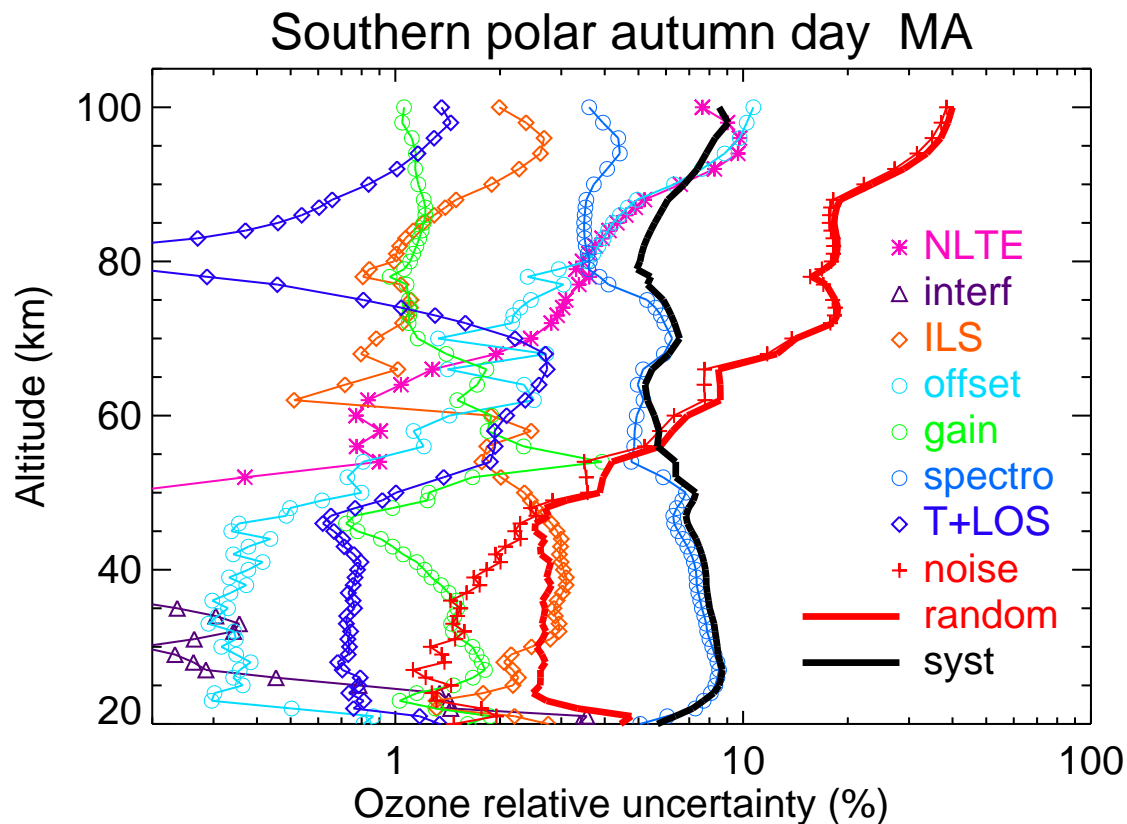

**Figure S33.** V8R\_O3\_561 Southern polar autumn day.

**Table S35.** Ozone error budget for Southern polar autumn night, MA. All uncertainties are  $1\sigma$ .

| altitude<br>(km) | mean O <sub>3</sub> vmr<br>(ppmv) | NLTE<br>(%) | interf<br>(%) | ILS<br>(%) | offset<br>(%) | gain<br>(%) | spectro<br>(%) | T+LOS<br>(%) | noise<br>(%) | random<br>(%) | syst<br>(%) |
|------------------|-----------------------------------|-------------|---------------|------------|---------------|-------------|----------------|--------------|--------------|---------------|-------------|
| 20               | 2.8                               | <0.1        | 3.7           | 3.1        | 0.8           | 2.0         | 5.5            | 1.5          | 1.6          | 5.3           | 6.0         |
| 30               | 3.9                               | <0.1        | 0.7           | 2.5        | 0.3           | 1.6         | 7.9            | 0.8          | 1.3          | 2.6           | 8.2         |
| 40               | 5.0                               | <0.1        | 8.3           | 3.0        | 0.4           | 1.2         | 7.0            | 0.7          | 1.9          | 9.0           | 7.3         |
| 50               | 2.3                               | 0.3         | 0.5           | 2.4        | 0.9           | 1.5         | 6.5            | 1.0          | 3.6          | 4.0           | 7.0         |
| 60               | 1.3                               | 1.3         | <0.1          | 2.1        | 1.6           | 2.3         | 3.6            | 2.1          | 6.2          | 6.9           | 4.7         |
| 70               | 1.8                               | 2.4         | 0.1           | 1.1        | 2.9           | 2.4         | 3.7            | 5.2          | 7.7          | 10            | 3.9         |
| 80               | 0.7                               | 2.7         | 0.2           | 0.9        | 1.2           | 1.5         | 3.6            | 1.1          | 14           | 14            | 4.1         |
| 90               | 11                                | 5.5         | 0.1           | 1.1        | 2.1           | 1.4         | 2.9            | 0.7          | 12           | 12            | 6.0         |
| 96               | 12                                | 6.7         | <0.1          | 2.9        | 3.1           | 1.1         | 2.8            | 1.7          | 14           | 15            | 7.2         |
| 100              | 7.8                               | 5.7         | 0.1           | 4.5        | 6.1           | 1.0         | 2.8            | 1.9          | 25           | 26            | 7.0         |

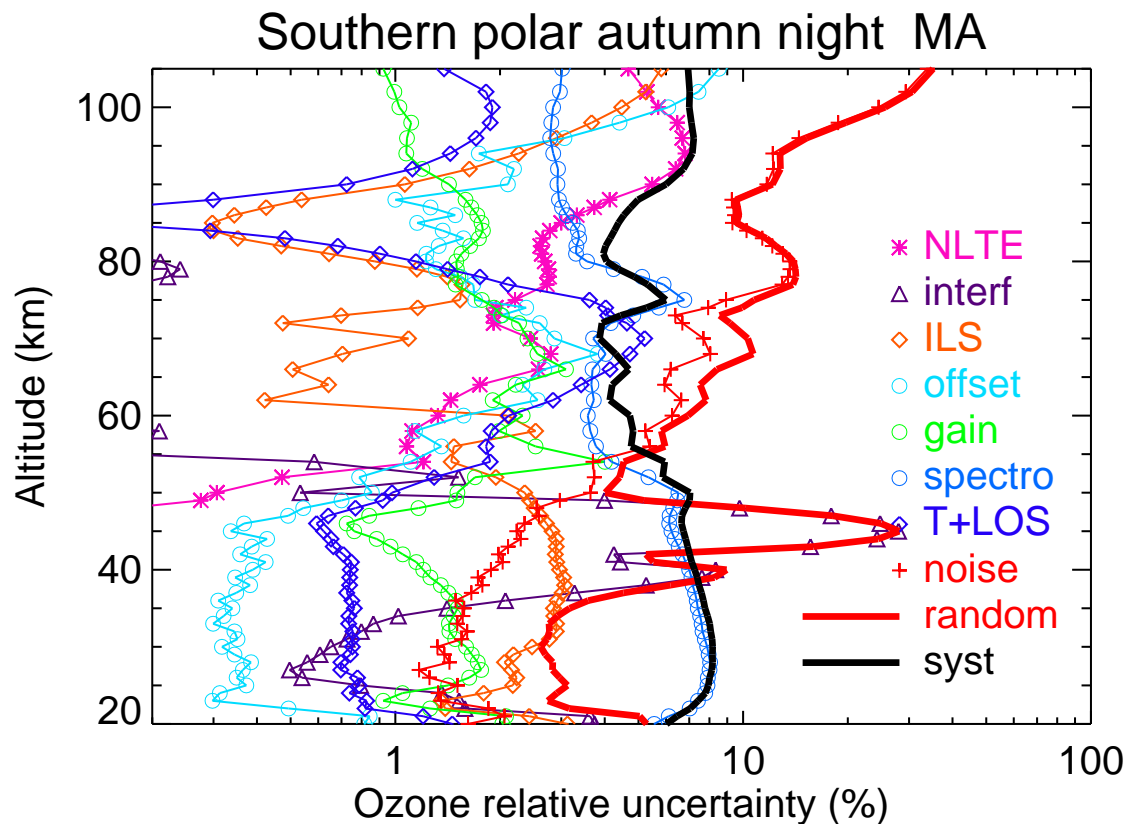

**Figure S34.** V8R\_O3\_561 Southern polar autumn night.

## **S2 Errors budget for O<sub>3</sub> UA data**

In this section we provide the errors for the UA data.

**Table S36.** Labels and definitions of the representative atmospheric conditions which were used to calculate the error budget for UA data.

| representative atmosphere label   | month(s) used | latitude range | solar zenith angle range |
|-----------------------------------|---------------|----------------|--------------------------|
| Northern polar winter day         | Jan, Feb      | 65°N – 90°N    | < 90°                    |
| Northern polar winter night       | Jan, Feb      | 65°N – 90°N    | > 100°                   |
| Northern polar spring day         | Apr           | 65°N – 90°N    | < 90°                    |
| Northern polar spring night       | Apr           | 65°N – 90°N    | > 100°                   |
| Northern polar summer day         | Jul, Aug      | 65°N – 90°N    | < 90°                    |
| Northern polar summer night       | Jul, Aug      | 65°N – 90°N    | > 100°                   |
| Northern polar autumn day         | Oct           | 65°N – 90°N    | < 90°                    |
| Northern polar autumn night       | Oct           | 65°N – 90°N    | > 100°                   |
| Northern midlatitude winter day   | Jan, Feb      | 40°N – 60°N    | < 90°                    |
| Northern midlatitude winter night | Jan, Feb      | 40°N – 60°N    | > 100°                   |
| Northern midlatitude spring day   | Apr           | 40°N – 60°N    | < 90°                    |
| Northern midlatitude spring night | Apr           | 40°N – 60°N    | > 100°                   |
| Northern midlatitude summer day   | Jul, Aug      | 40°N – 60°N    | < 90°                    |
| Northern midlatitude summer night | Jul, Aug      | 40°N – 60°N    | > 100°                   |
| Northern midlatitude autumn day   | Oct           | 40°N – 60°N    | < 90°                    |
| Northern midlatitude autumn night | Oct           | 40°N – 60°N    | > 100°                   |
| Tropics day                       | Apr           | 20°S – 20°N    | < 90°                    |
| Tropics night                     | Apr           | 20°S – 20°N    | > 100°                   |
| Southern midlatitude winter day   | Jul, Aug      | 40°S – 60°S    | < 90°                    |
| Southern midlatitude winter night | Jul, Aug      | 40°S – 60°S    | > 100°                   |
| Southern midlatitude spring day   | Oct           | 40°S – 60°S    | < 90°                    |
| Southern midlatitude spring night | Oct           | 40°S – 60°S    | > 100°                   |
| Southern midlatitude summer day   | Jan, Feb      | 40°S – 60°S    | < 90°                    |
| Southern midlatitude summer night | Jan, Feb      | 40°S – 60°S    | > 100°                   |
| Southern midlatitude autumn day   | Apr           | 40°S – 60°S    | < 90°                    |
| Southern midlatitude autumn night | Apr           | 40°S – 60°S    | > 100°                   |
| Southern polar winter day         | Jul, Aug      | 65°S – 90°S    | < 90°                    |
| Southern polar winter night       | Jul, Aug      | 65°S – 90°S    | > 100°                   |
| Southern polar spring day         | Oct           | 65°S – 90°S    | < 90°                    |
| Southern polar spring night       | Oct           | 65°S – 90°S    | > 100°                   |
| Southern polar summer day         | Jan, Feb      | 65°S – 90°S    | < 90°                    |
| Southern polar summer night       | Jan, Feb      | 65°S – 90°S    | > 100°                   |
| Southern polar autumn day         | Apr           | 65°S – 90°S    | < 90°                    |
| Southern polar autumn night       | Apr           | 65°S – 90°S    | > 100°                   |

**Table S37.** Ozone error budget for Northern polar winter day, UA. All uncertainties are  $1\sigma$ .

| altitude<br>(km) | mean O <sub>3</sub> vmr<br>(ppmv) | NLTE<br>(%) | interf<br>(%) | ILS<br>(%) | offset<br>(%) | gain<br>(%) | spectro<br>(%) | T+LOS<br>(%) | noise<br>(%) | random<br>(%) | syst<br>(%) |
|------------------|-----------------------------------|-------------|---------------|------------|---------------|-------------|----------------|--------------|--------------|---------------|-------------|
| 40               | 6.4                               | <0.1        | <0.1          | 2.4        | 0.5           | 0.9         | 6.4            | 0.8          | 2.4          | 2.7           | 6.8         |
| 50               | 3.0                               | 0.2         | 0.1           | 2.0        | 0.8           | 1.1         | 7.8            | 1.4          | 3.7          | 4.3           | 8.0         |
| 60               | 0.7                               | 1.2         | <0.1          | 1.4        | 2.3           | 2.0         | 6.3            | 3.0          | 7.9          | 8.9           | 6.6         |
| 70               | 0.2                               | 2.9         | <0.1          | 1.5        | 2.0           | 1.6         | 6.8            | 2.0          | 16           | 17            | 7.3         |
| 80               | 0.3                               | 6.5         | <0.1          | 0.9        | 3.7           | 1.7         | 4.2            | <0.1         | 17           | 18            | 6.4         |
| 90               | 1.2                               | 6.0         | <0.1          | 1.5        | 6.9           | 1.3         | 3.8            | 0.5          | 25           | 26            | 5.9         |
| 96               | 0.8                               | 6.3         | <0.1          | 1.9        | 10            | 1.1         | 3.8            | 0.7          | 37           | 39            | 6.5         |

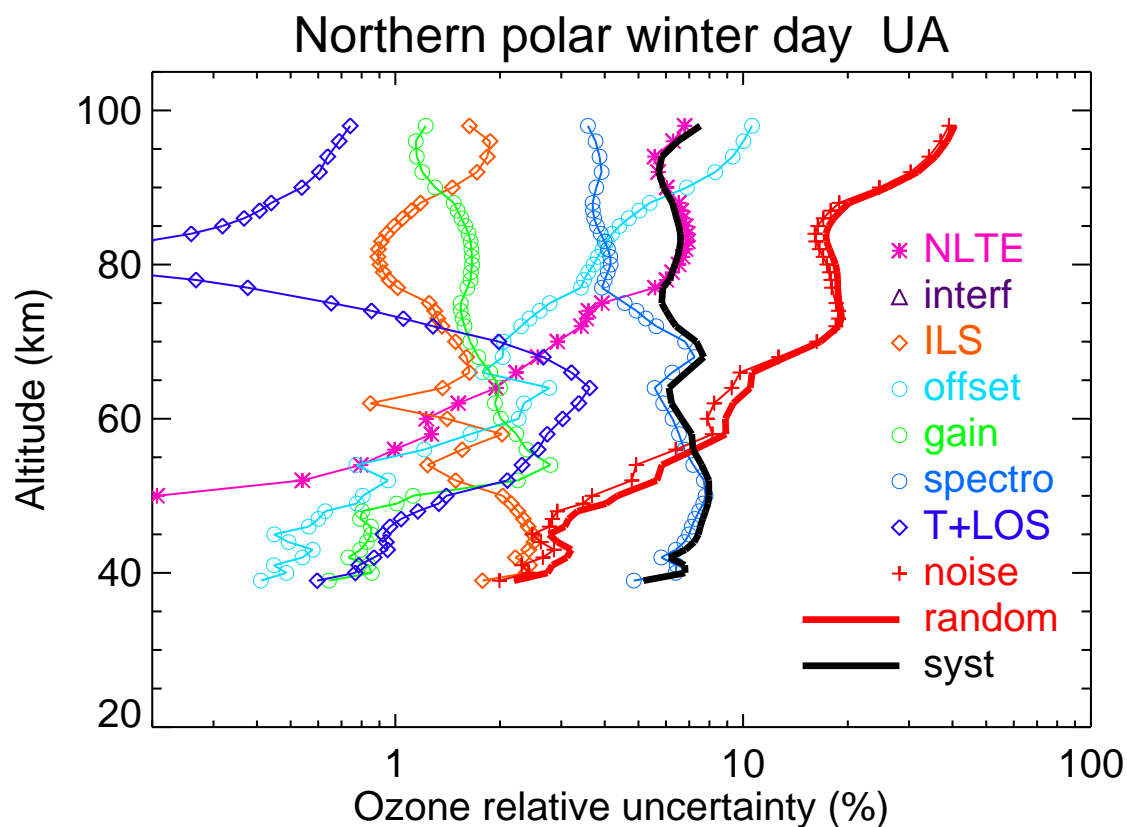

**Figure S35.** V8R\_O3\_661 Northern polar winter day.

**Table S38.** Ozone error budget for Northern polar winter night, UA. All uncertainties are  $1\sigma$ .

| altitude<br>(km) | mean O <sub>3</sub> vmr<br>(ppmv) | NLTE<br>(%) | interf<br>(%) | ILS<br>(%) | offset<br>(%) | gain<br>(%) | spectro<br>(%) | T+LOS<br>(%) | noise<br>(%) | random<br>(%) | syst<br>(%) |
|------------------|-----------------------------------|-------------|---------------|------------|---------------|-------------|----------------|--------------|--------------|---------------|-------------|
| 50               | 1.6                               | 0.4         | 0.2           | 1.7        | 0.9           | 1.1         | 5.8            | 0.9          | 3.7          | 4.4           | 5.9         |
| 60               | 1.5                               | 1.7         | <0.1          | 2.2        | 1.6           | 1.8         | 3.4            | 2.2          | 4.8          | 5.9           | 4.3         |
| 70               | 2.3                               | 2.3         | <0.1          | 0.9        | 3.7           | 2.1         | 4.5            | 5.1          | 7.9          | 11            | 4.2         |
| 80               | 1.0                               | 2.8         | <0.1          | 0.9        | 2.2           | 2.0         | 4.2            | 0.6          | 12           | 12            | 3.6         |
| 90               | 9.2                               | 5.3         | <0.1          | 1.2        | 1.7           | 1.4         | 3.5            | 1.4          | 11           | 12            | 4.8         |
| 96               | 7.4                               | 4.2         | <0.1          | 3.2        | 3.5           | 0.9         | 3.3            | 1.7          | 17           | 18            | 5.8         |
| 100              | 4.9                               | 4.7         | <0.1          | 5.0        | 6.8           | 1.0         | 3.6            | 1.5          | 28           | 29            | 6.8         |

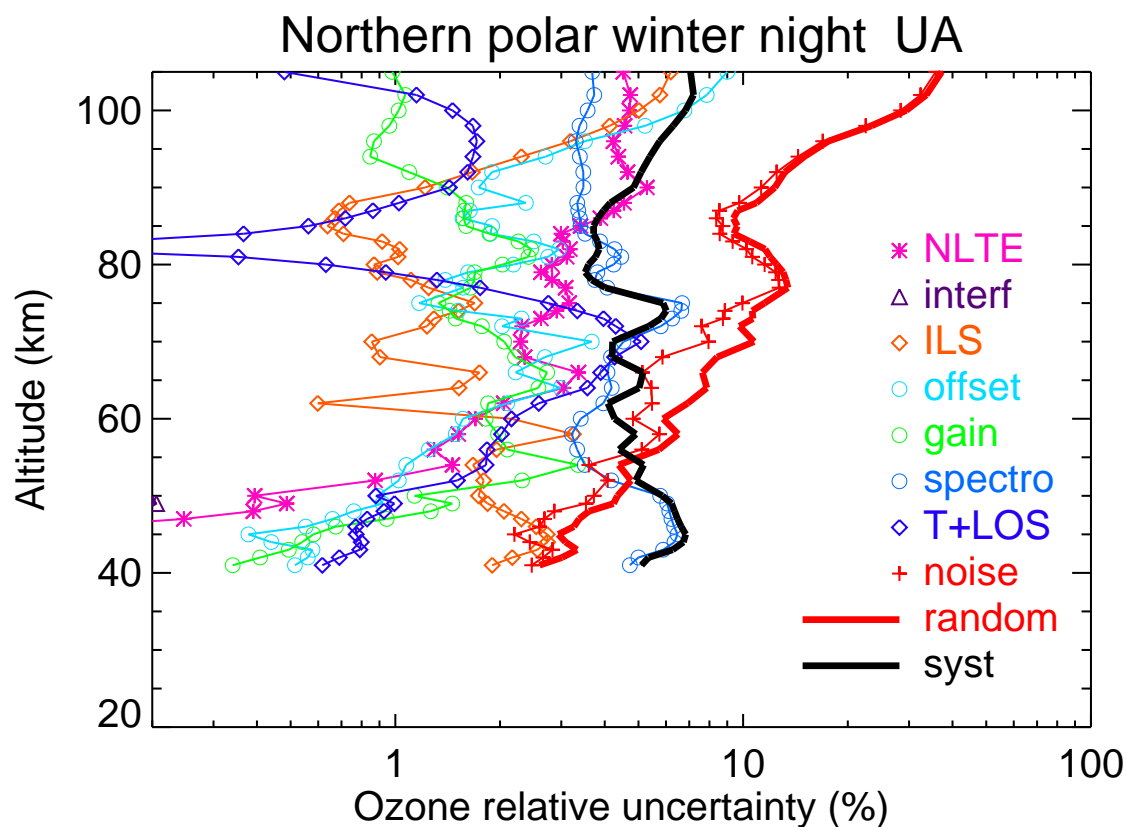

**Figure S36.** V8R\_O3\_661 Northern polar winter night.



**Table S39.** Ozone error budget for Northern polar spring day, UA. All uncertainties are  $1\sigma$ .

| altitude<br>(km) | mean O <sub>3</sub> vmr<br>(ppmv) | NLTE<br>(%) | interf<br>(%) | ILS<br>(%) | offset<br>(%) | gain<br>(%) | spectro<br>(%) | T+LOS<br>(%) | noise<br>(%) | random<br>(%) | syst<br>(%) |
|------------------|-----------------------------------|-------------|---------------|------------|---------------|-------------|----------------|--------------|--------------|---------------|-------------|
| 50               | 2.3                               | <0.1        | 0.2           | 2.4        | 0.6           | 1.3         | 5.4            | 0.8          | 2.8          | 3.0           | 6.0         |
| 60               | 0.8                               | 0.4         | <0.1          | 2.0        | 1.5           | 1.6         | 4.7            | 2.0          | 4.1          | 5.0           | 5.2         |
| 70               | 0.2                               | 3.7         | <0.1          | 1.1        | 2.7           | 1.2         | 4.9            | 2.0          | 12           | 12            | 6.0         |
| 80               | 0.1                               | 5.9         | <0.1          | 0.6        | 2.0           | 1.0         | 3.8            | 0.4          | 15           | 16            | 6.4         |
| 90               | 0.6                               | 4.9         | <0.1          | 2.3        | 5.3           | 1.1         | 3.3            | 1.6          | 21           | 22            | 6.0         |
| 96               | 0.3                               | 7.6         | <0.1          | 3.9        | 8.7           | 0.9         | 3.7            | 2.2          | 35           | 36            | 7.3         |

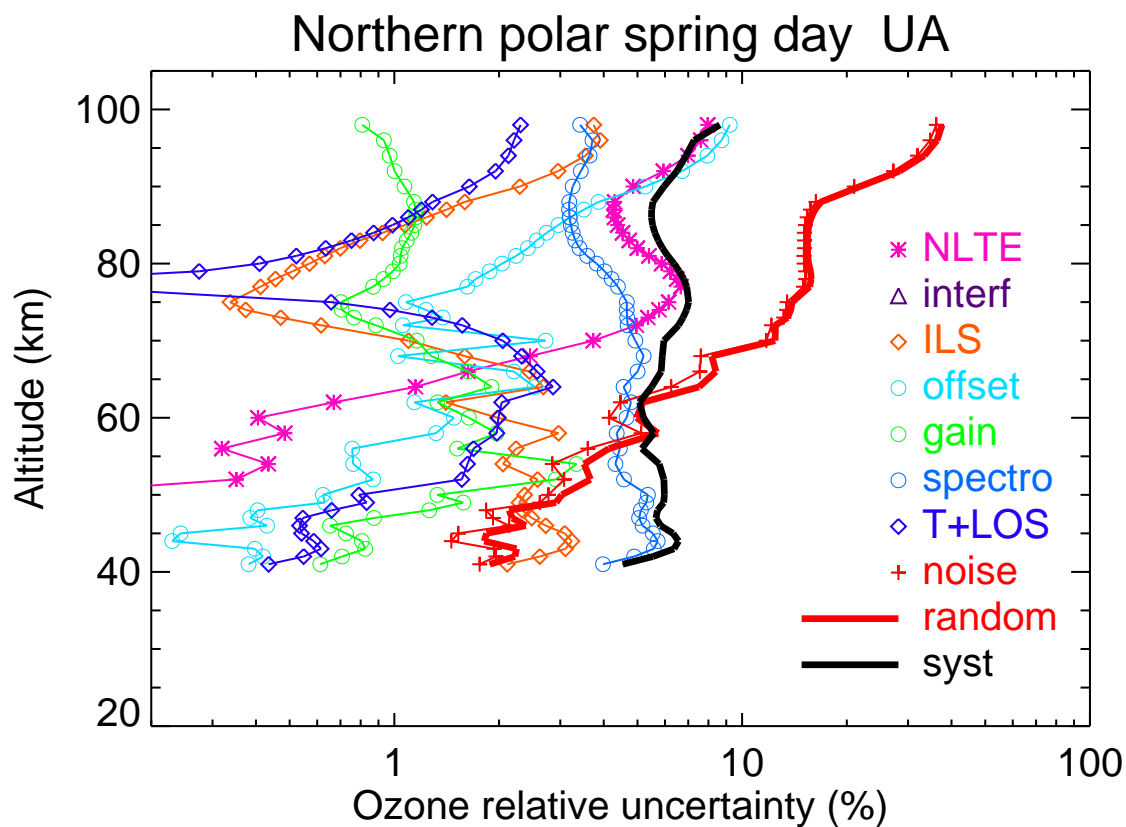

**Figure S37.** V8R\_O3\_661 Northern polar spring day.

**Table S40.** Ozone error budget for Northern polar spring night, UA. All uncertainties are  $1\sigma$ .

| altitude<br>(km) | mean O <sub>3</sub> vmr<br>(ppmv) | NLTE<br>(%) | interf<br>(%) | ILS<br>(%) | offset<br>(%) | gain<br>(%) | spectro<br>(%) | T+LOS<br>(%) | noise<br>(%) | random<br>(%) | syst<br>(%) |
|------------------|-----------------------------------|-------------|---------------|------------|---------------|-------------|----------------|--------------|--------------|---------------|-------------|
| 40               | 6.7                               | <0.1        | <0.1          | 2.9        | 0.4           | 1.1         | 6.7            | 0.7          | 1.7          | 1.9           | 7.3         |
| 50               | 2.5                               | <0.1        | 0.2           | 2.2        | 0.6           | 1.5         | 5.2            | 0.8          | 2.8          | 3.2           | 5.7         |
| 60               | 1.4                               | 0.5         | <0.1          | 2.2        | 1.5           | 1.7         | 3.5            | 2.2          | 4.2          | 5.2           | 4.3         |
| 70               | 1.2                               | 2.0         | <0.1          | 1.0        | 3.3           | 1.7         | 4.2            | 4.0          | 8.5          | 10            | 4.5         |
| 80               | 0.3                               | 4.2         | <0.1          | 0.4        | 1.0           | 1.0         | 3.3            | <0.1         | 14           | 14            | 4.8         |
| 90               | 7.7                               | 4.4         | <0.1          | 0.9        | 1.4           | 1.6         | 2.9            | 2.7          | 10           | 11            | 4.9         |
| 96               | 10                                | 6.0         | <0.1          | 2.2        | 2.4           | 1.2         | 2.9            | 3.4          | 12           | 13            | 6.0         |
| 100              | 6.4                               | 5.3         | <0.1          | 4.0        | 4.8           | 1.2         | 3.0            | 2.9          | 21           | 22            | 6.4         |

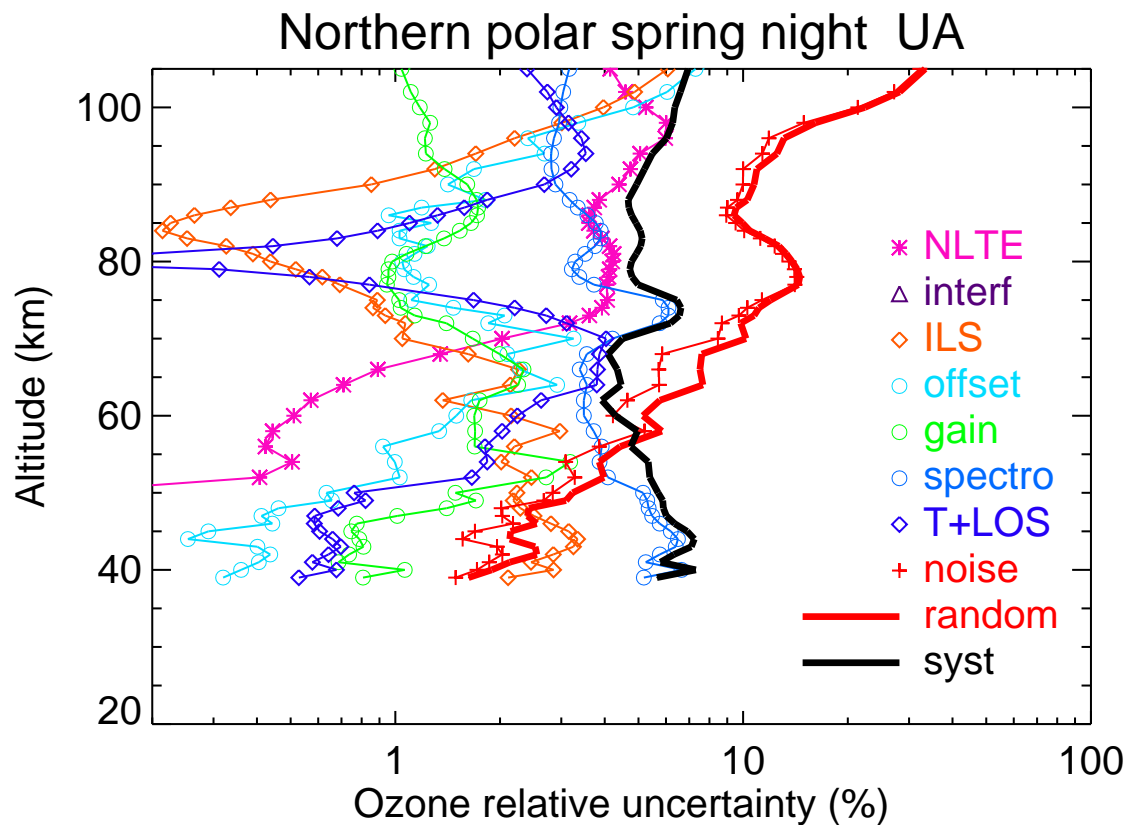

**Figure S38.** V8R\_O3\_661 Northern polar spring night.

**Table S41.** Ozone error budget for Northern polar summer day, UA. All uncertainties are  $1\sigma$ .

| altitude<br>(km) | mean O <sub>3</sub> vmr<br>(ppmv) | NLTE<br>(%) | interf<br>(%) | ILS<br>(%) | offset<br>(%) | gain<br>(%) | spectro<br>(%) | T+LOS<br>(%) | noise<br>(%) | random<br>(%) | syst<br>(%) |
|------------------|-----------------------------------|-------------|---------------|------------|---------------|-------------|----------------|--------------|--------------|---------------|-------------|
| 50               | 2.5                               | <0.1        | 0.2           | 2.4        | 0.5           | 1.5         | 4.6            | 0.6          | 2.3          | 2.5           | 5.3         |
| 60               | 1.1                               | 0.2         | <0.1          | 1.9        | 1.2           | 1.4         | 4.4            | 1.8          | 3.4          | 4.2           | 4.9         |
| 70               | 0.3                               | 4.1         | <0.1          | 0.7        | 2.4           | 0.8         | 6.1            | 2.3          | 9.0          | 10            | 7.1         |
| 80               | 0.1                               | 7.0         | <0.1          | 0.4        | 2.3           | 0.6         | 3.9            | 1.9          | 16           | 16            | 7.6         |
| 90               | 1.1                               | 8.5         | <0.1          | 1.7        | 4.7           | 1.1         | 3.6            | 4.3          | 18           | 20            | 7.5         |
| 96               | 0.5                               | 13          | <0.1          | 2.6        | 7.8           | 1.5         | 4.9            | 4.8          | 31           | 33            | 11          |

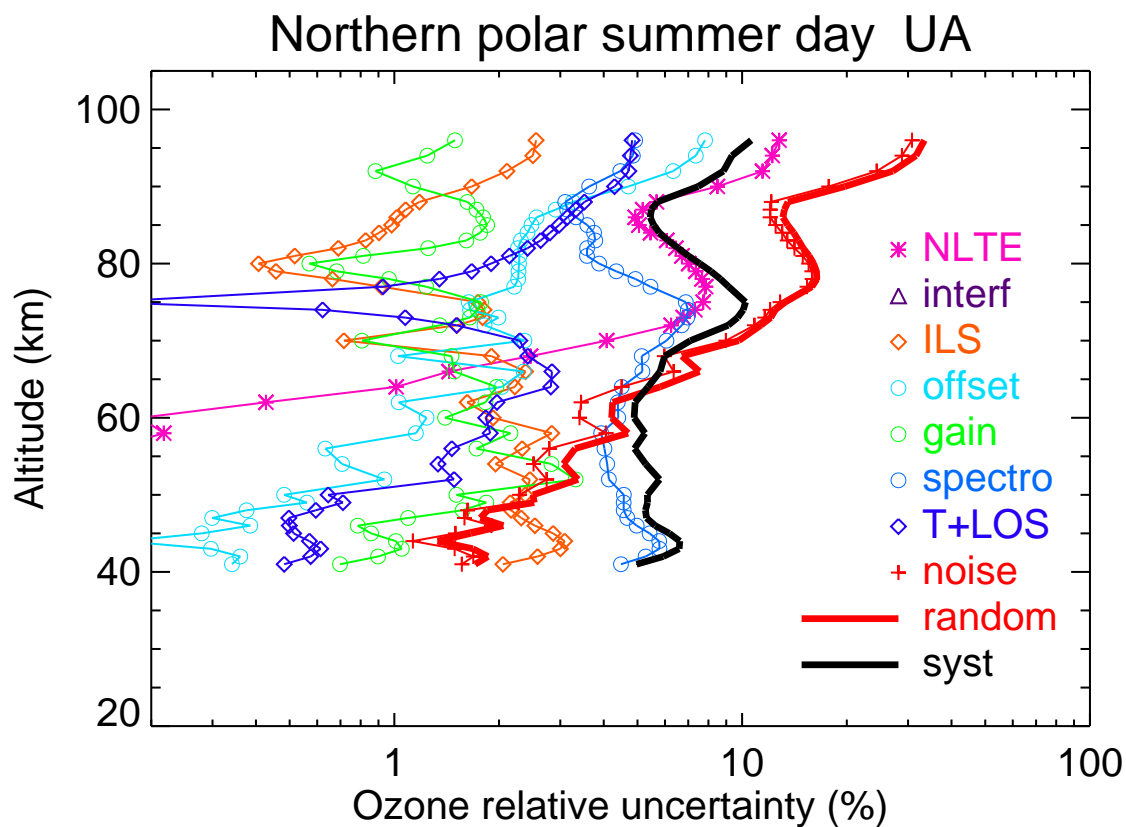

**Figure S39.** V8R\_O3\_661 Northern polar summer day.

**Table S42.** Ozone error budget for Northern polar summer night, UA. All uncertainties are  $1\sigma$ .

| altitude<br>(km) | mean O <sub>3</sub> vmr<br>(ppmv) | NLTE<br>(%) | interf<br>(%) | ILS<br>(%) | offset<br>(%) | gain<br>(%) | spectro<br>(%) | T+LOS<br>(%) | noise<br>(%) | random<br>(%) | syst<br>(%) |
|------------------|-----------------------------------|-------------|---------------|------------|---------------|-------------|----------------|--------------|--------------|---------------|-------------|
| 50               | 2.6                               | <0.1        | 0.2           | 2.2        | 0.6           | 1.6         | 4.8            | 0.7          | 2.6          | 2.8           | 5.5         |
| 60               | 1.4                               | 0.2         | <0.1          | 1.8        | 1.4           | 1.4         | 3.8            | 2.1          | 3.7          | 4.6           | 4.4         |
| 70               | 1.1                               | 3.8         | <0.1          | 1.1        | 3.2           | 1.0         | 4.3            | 3.6          | 9.0          | 10            | 5.5         |
| 80               | 0.1                               | 5.3         | <0.1          | 0.7        | 1.7           | 0.7         | 3.4            | 1.2          | 15           | 15            | 6.2         |
| 90               | 3.6                               | 5.0         | <0.1          | 1.9        | 1.9           | 1.3         | 3.0            | 3.5          | 12           | 13            | 5.6         |
| 96               | 4.6                               | 6.8         | <0.1          | 3.3        | 4.5           | 1.3         | 3.2            | 2.5          | 20           | 21            | 7.4         |
| 100              | 2.0                               | 7.1         | <0.1          | 4.6        | 7.3           | 1.5         | 3.7            | 2.0          | 31           | 32            | 7.9         |

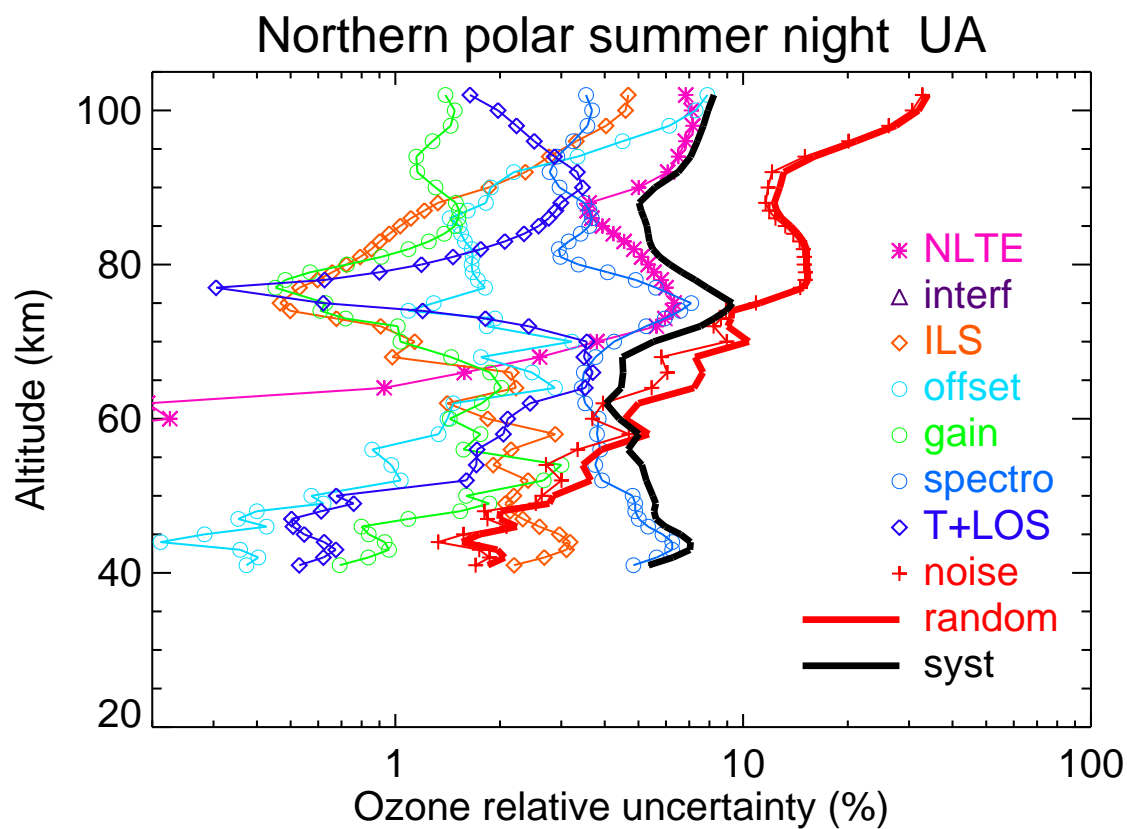

**Figure S40.** V8R\_O3\_661 Northern polar summer night.

**Table S43.** Ozone error budget for Northern polar autumn day, UA. All uncertainties are  $1\sigma$ .

| altitude<br>(km) | mean O <sub>3</sub> vmr<br>(ppmv) | NLTE<br>(%) | interf<br>(%) | ILS<br>(%) | offset<br>(%) | gain<br>(%) | spectro<br>(%) | T+LOS<br>(%) | noise<br>(%) | random<br>(%) | syst<br>(%) |
|------------------|-----------------------------------|-------------|---------------|------------|---------------|-------------|----------------|--------------|--------------|---------------|-------------|
| 50               | 2.4                               | 0.1         | 0.1           | 2.3        | 0.7           | 1.0         | 6.3            | 0.9          | 3.2          | 3.4           | 6.8         |
| 60               | 0.7                               | 0.7         | <0.1          | 1.8        | 1.9           | 1.7         | 5.4            | 2.2          | 5.7          | 6.5           | 5.8         |
| 70               | 0.2                               | 2.4         | <0.1          | 1.2        | 2.4           | 1.3         | 5.7            | 2.2          | 13           | 13            | 5.9         |
| 80               | 0.1                               | 4.1         | <0.1          | 0.8        | 2.7           | 1.1         | 3.7            | <0.1         | 17           | 17            | 5.3         |
| 90               | 1.1                               | 6.4         | <0.1          | 1.7        | 5.7           | 1.0         | 3.6            | 0.9          | 22           | 23            | 6.9         |
| 96               | 0.7                               | 10          | <0.1          | 2.9        | 9.3           | 0.7         | 4.2            | 1.4          | 36           | 38            | 8.5         |
| 100              | 1.0                               | 11          | <0.1          | 2.5        | 10            | 0.4         | 3.9            | 1.9          | 37           | 39            | 12          |

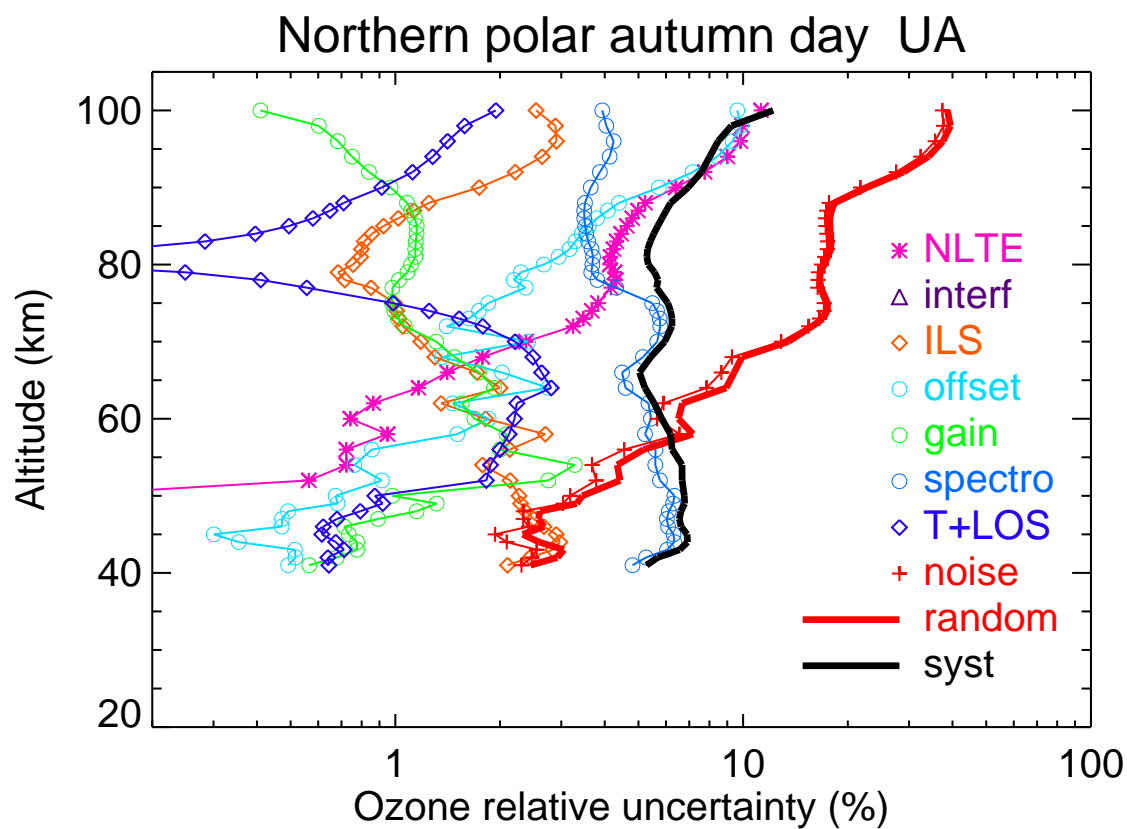

**Figure S41.** V8R\_O3\_661 Northern polar autumn day.

**Table S44.** Ozone error budget for Northern polar autumn night, UA. All uncertainties are  $1\sigma$ .

| altitude<br>(km) | mean O <sub>3</sub> vmr<br>(ppmv) | NLTE<br>(%) | interf<br>(%) | ILS<br>(%) | offset<br>(%) | gain<br>(%) | spectro<br>(%) | T+LOS<br>(%) | noise<br>(%) | random<br>(%) | syst<br>(%) |
|------------------|-----------------------------------|-------------|---------------|------------|---------------|-------------|----------------|--------------|--------------|---------------|-------------|
| 50               | 2.3                               | 0.3         | 0.2           | 2.2        | 0.8           | 1.2         | 6.9            | 1.1          | 3.5          | 3.9           | 7.3         |
| 60               | 1.2                               | 1.4         | <0.1          | 2.0        | 1.6           | 1.9         | 3.5            | 2.2          | 5.1          | 5.9           | 4.4         |
| 70               | 2.1                               | 2.8         | <0.1          | 1.0        | 3.9           | 2.1         | 4.1            | 5.6          | 8.4          | 11            | 3.9         |
| 80               | 0.8                               | 3.5         | <0.1          | 1.0        | 1.5           | 1.6         | 3.3            | 1.3          | 13           | 14            | 3.7         |
| 90               | 14                                | 7.1         | <0.1          | 0.7        | 1.3           | 1.4         | 3.4            | 1.3          | 10           | 11            | 6.6         |
| 96               | 12                                | 4.7         | <0.1          | 2.5        | 2.3           | 1.0         | 3.2            | 1.8          | 14           | 14            | 5.7         |
| 100              | 9.0                               | 5.1         | <0.1          | 4.1        | 5.1           | 0.8         | 3.4            | 2.1          | 23           | 24            | 6.3         |

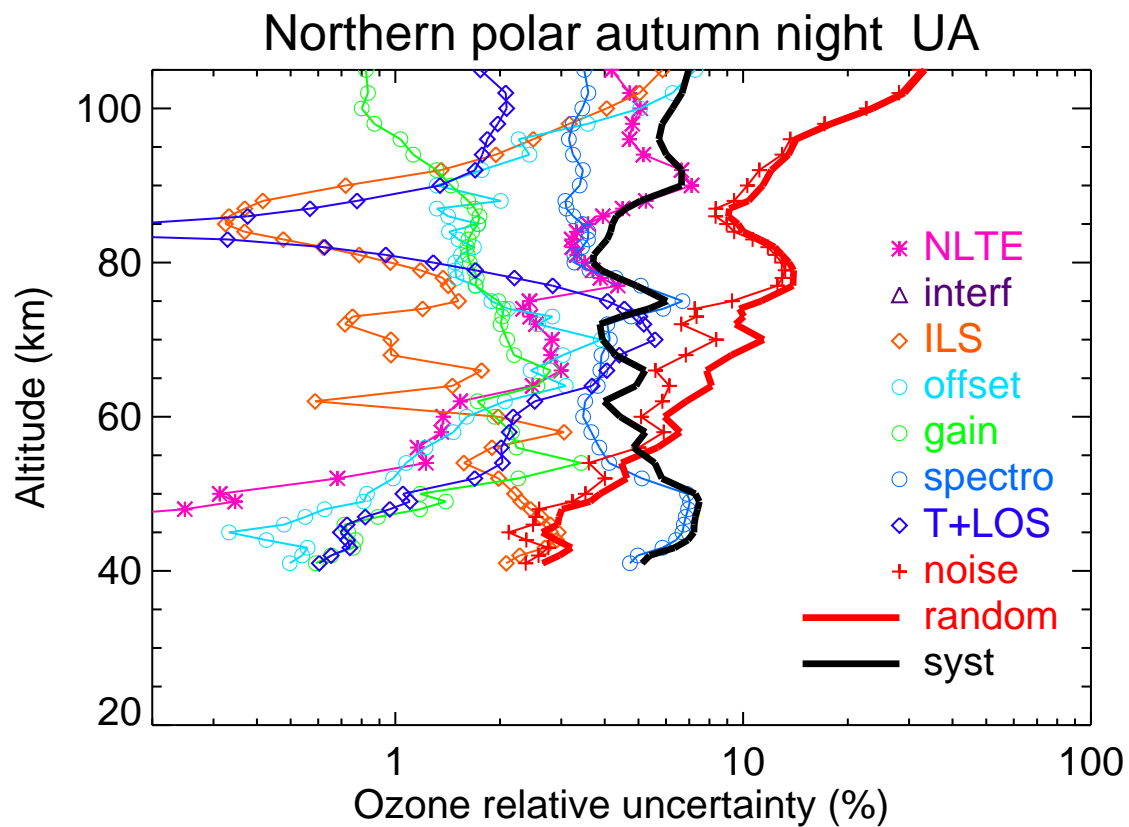

**Figure S42.** V8R\_O3\_661 Northern polar autumn night.

**Table S45.** Ozone error budget for Northern midlatitude winter day, UA. All uncertainties are  $1\sigma$ .

| altitude<br>(km) | mean O <sub>3</sub> vmr<br>(ppmv) | NLTE<br>(%) | interf<br>(%) | ILS<br>(%) | offset<br>(%) | gain<br>(%) | spectro<br>(%) | T+LOS<br>(%) | noise<br>(%) | random<br>(%) | syst<br>(%) |
|------------------|-----------------------------------|-------------|---------------|------------|---------------|-------------|----------------|--------------|--------------|---------------|-------------|
| 40               | 7.2                               | <0.1        | <0.1          | 2.7        | 0.4           | 1.0         | 6.5            | 0.7          | 1.8          | 2.1           | 7.0         |
| 50               | 2.5                               | 0.2         | 0.1           | 2.3        | 0.7           | 1.9         | 6.1            | 1.1          | 2.9          | 3.8           | 6.5         |
| 60               | 0.8                               | 0.7         | <0.1          | 1.9        | 1.8           | 1.6         | 5.0            | 2.4          | 5.3          | 6.2           | 5.4         |
| 70               | 0.3                               | 3.4         | <0.1          | 0.9        | 2.5           | 1.2         | 5.2            | 2.9          | 12           | 12            | 5.9         |
| 80               | 0.1                               | 4.0         | <0.1          | 1.1        | 3.4           | 0.9         | 4.1            | <0.1         | 18           | 18            | 5.5         |
| 90               | 0.7                               | 4.9         | <0.1          | 2.2        | 7.1           | 0.9         | 3.8            | 0.8          | 25           | 26            | 5.8         |
| 96               | 0.5                               | 6.1         | <0.1          | 3.2        | 10            | 0.8         | 3.7            | 1.0          | 36           | 38            | 6.7         |

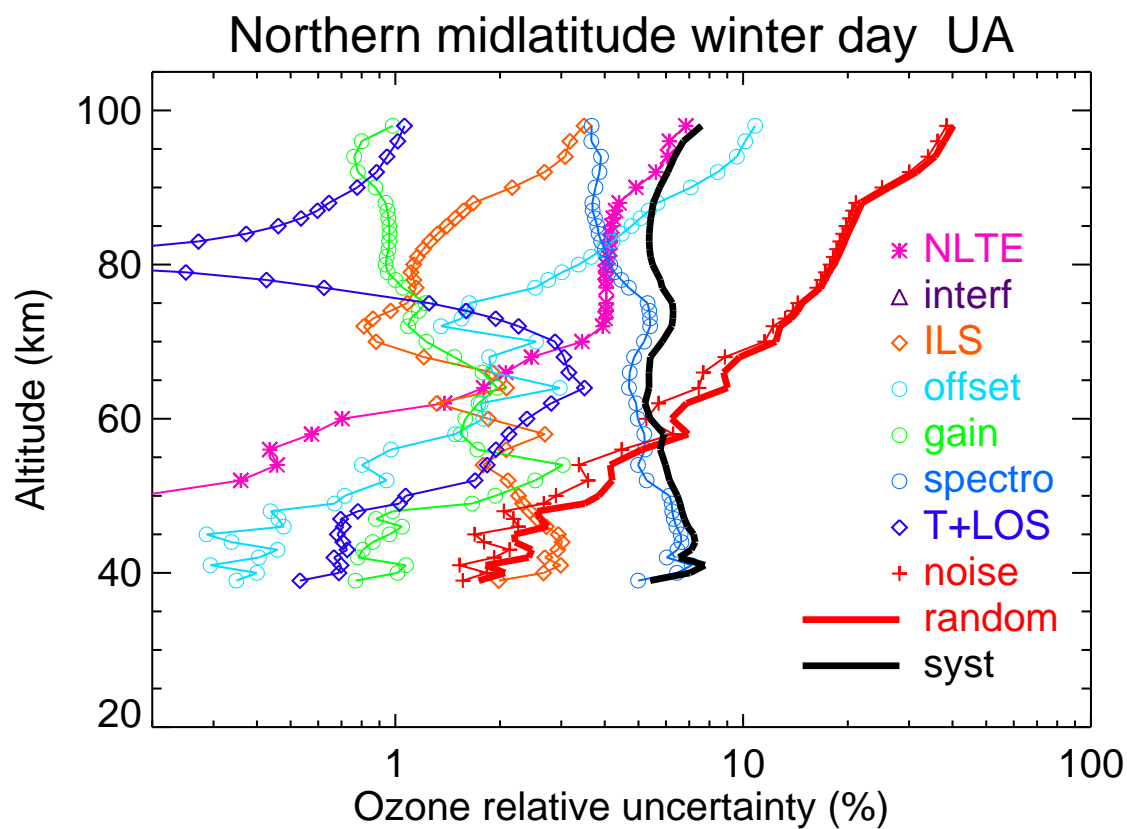

**Figure S43.** V8R\_O3\_661 Northern midlatitude winter day.

**Table S46.** Ozone error budget for Northern midlatitude winter night, UA. All uncertainties are  $1\sigma$ .

| altitude<br>(km) | mean O <sub>3</sub> vmr<br>(ppmv) | NLTE<br>(%) | interf<br>(%) | ILS<br>(%) | offset<br>(%) | gain<br>(%) | spectro<br>(%) | T+LOS<br>(%) | noise<br>(%) | random<br>(%) | syst<br>(%) |
|------------------|-----------------------------------|-------------|---------------|------------|---------------|-------------|----------------|--------------|--------------|---------------|-------------|
| 40               | 7.2                               | <0.1        | <0.1          | 2.5        | 0.4           | 0.8         | 6.1            | 0.6          | 1.9          | 2.1           | 6.6         |
| 50               | 2.8                               | 0.2         | 0.1           | 2.4        | 0.7           | 1.4         | 6.6            | 0.9          | 3.2          | 3.9           | 6.9         |
| 60               | 1.4                               | 0.8         | <0.1          | 1.9        | 1.8           | 1.5         | 4.2            | 2.6          | 5.7          | 6.8           | 4.6         |
| 70               | 0.9                               | 1.6         | <0.1          | 1.1        | 3.4           | 2.0         | 5.1            | 4.4          | 9.4          | 11            | 4.8         |
| 80               | 0.4                               | 3.8         | <0.1          | 1.1        | 2.3           | 2.1         | 4.3            | 0.3          | 14           | 15            | 3.8         |
| 90               | 5.0                               | 3.7         | <0.1          | 0.7        | 1.8           | 1.5         | 3.1            | 1.1          | 13           | 13            | 3.7         |
| 96               | 7.1                               | 4.9         | <0.1          | 2.3        | 3.1           | 1.0         | 2.9            | 1.4          | 15           | 16            | 5.5         |
| 100              | 5.4                               | 5.4         | <0.1          | 3.4        | 6.2           | 0.9         | 2.9            | 1.2          | 26           | 27            | 6.2         |

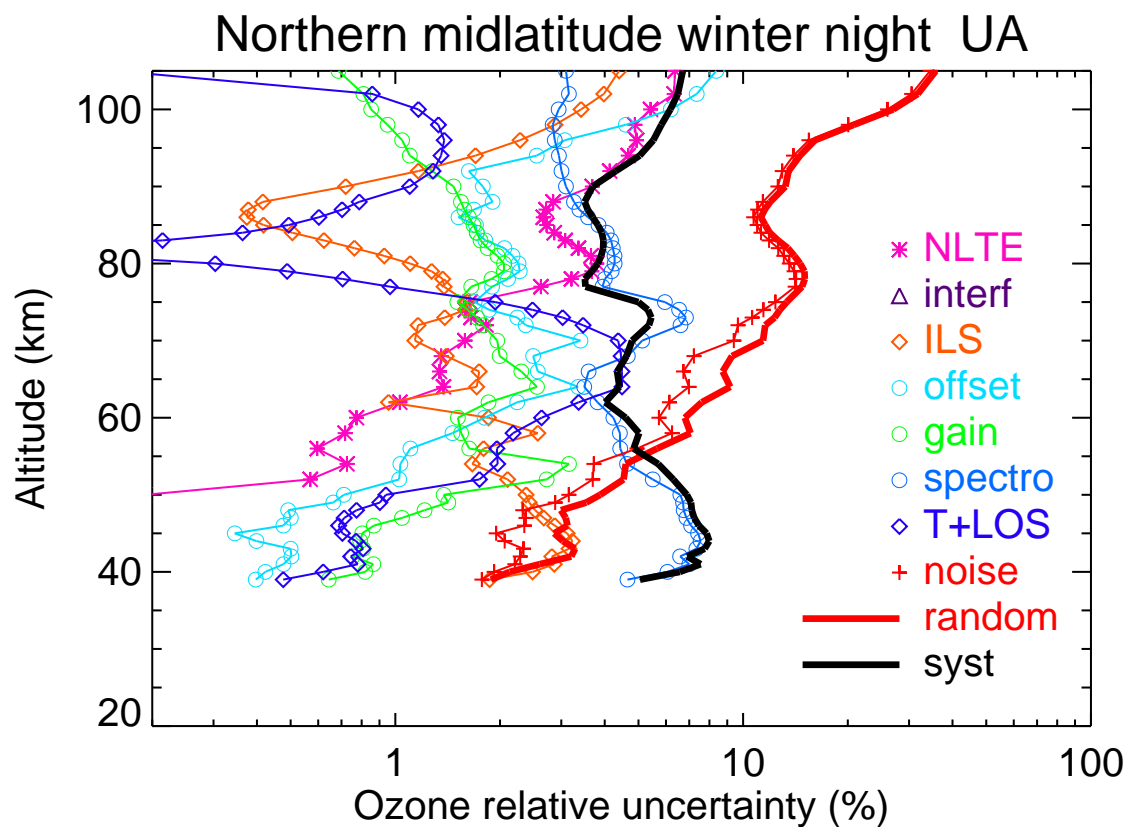

**Figure S44.** V8R\_O3\_661 Northern midlatitude winter night.



**Table S47.** Ozone error budget for Northern midlatitude spring day, UA. All uncertainties are  $1\sigma$ .

| altitude<br>(km) | mean O <sub>3</sub> vmr<br>(ppmv) | NLTE<br>(%) | interf<br>(%) | ILS<br>(%) | offset<br>(%) | gain<br>(%) | spectro<br>(%) | T+LOS<br>(%) | noise<br>(%) | random<br>(%) | syst<br>(%) |
|------------------|-----------------------------------|-------------|---------------|------------|---------------|-------------|----------------|--------------|--------------|---------------|-------------|
| 50               | 2.5                               | <0.1        | 0.2           | 2.3        | 0.6           | 1.3         | 5.6            | 0.8          | 2.8          | 3.1           | 6.2         |
| 60               | 1.0                               | 0.4         | <0.1          | 1.9        | 1.7           | 1.4         | 5.1            | 2.3          | 4.8          | 5.7           | 5.5         |
| 70               | 0.3                               | 3.8         | <0.1          | 0.9        | 2.5           | 1.1         | 5.2            | 2.3          | 12           | 13            | 6.2         |
| 80               | 0.2                               | 5.7         | <0.1          | 0.5        | 2.0           | 1.1         | 3.6            | 0.2          | 14           | 15            | 6.6         |
| 90               | 0.6                               | 5.0         | <0.1          | 2.4        | 6.0           | 1.1         | 3.4            | 1.4          | 24           | 25            | 6.1         |
| 96               | 0.3                               | 6.6         | <0.1          | 3.7        | 9.4           | 0.8         | 3.6            | 1.7          | 36           | 38            | 7.1         |

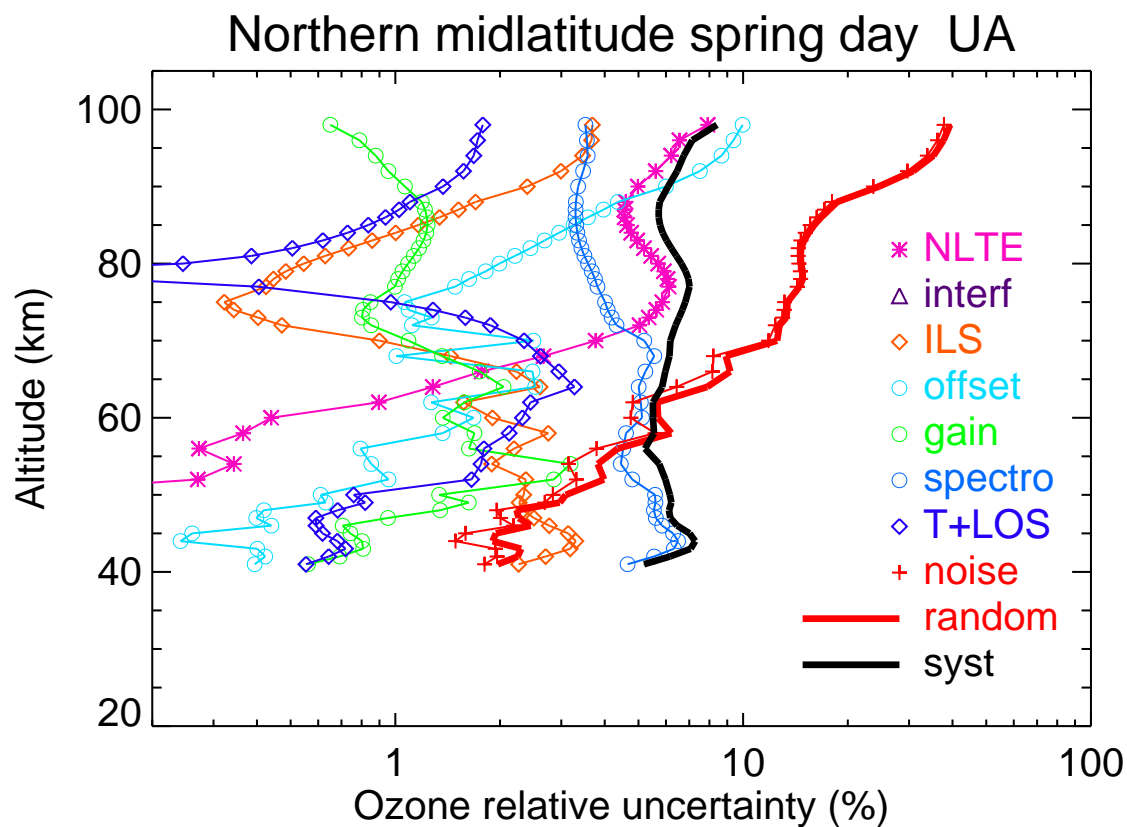

**Figure S45.** V8R\_O3\_661 Northern midlatitude spring day.

**Table S48.** Ozone error budget for Northern midlatitude spring night, UA. All uncertainties are  $1\sigma$ .

| altitude<br>(km) | mean O <sub>3</sub> vmr<br>(ppmv) | NLTE<br>(%) | interf<br>(%) | ILS<br>(%) | offset<br>(%) | gain<br>(%) | spectro<br>(%) | T+LOS<br>(%) | noise<br>(%) | random<br>(%) | syst<br>(%) |
|------------------|-----------------------------------|-------------|---------------|------------|---------------|-------------|----------------|--------------|--------------|---------------|-------------|
| 40               | 7.3                               | <0.1        | <0.1          | 2.7        | 0.3           | 1.1         | 7.0            | 0.8          | 1.7          | 1.9           | 7.6         |
| 50               | 2.7                               | <0.1        | 0.1           | 2.2        | 0.6           | 1.6         | 5.2            | 0.8          | 2.8          | 3.2           | 5.8         |
| 60               | 1.5                               | 0.2         | <0.1          | 1.7        | 1.5           | 1.5         | 3.7            | 2.3          | 4.2          | 5.2           | 4.3         |
| 70               | 1.2                               | 3.7         | <0.1          | 0.9        | 3.6           | 1.4         | 3.8            | 5.2          | 10           | 12            | 5.0         |
| 80               | 0.2                               | 4.9         | <0.1          | 0.6        | 1.1           | 1.3         | 3.1            | <0.1         | 14           | 14            | 5.4         |
| 90               | 7.2                               | 4.9         | <0.1          | 0.7        | 1.4           | 1.5         | 3.1            | 3.4          | 10           | 11            | 5.6         |
| 96               | 12                                | 9.0         | <0.1          | 1.7        | 2.3           | 1.2         | 2.8            | 3.6          | 12           | 14            | 8.2         |
| 100              | 7.6                               | 9.2         | <0.1          | 3.1        | 4.6           | 1.4         | 3.1            | 2.9          | 20           | 22            | 7.8         |

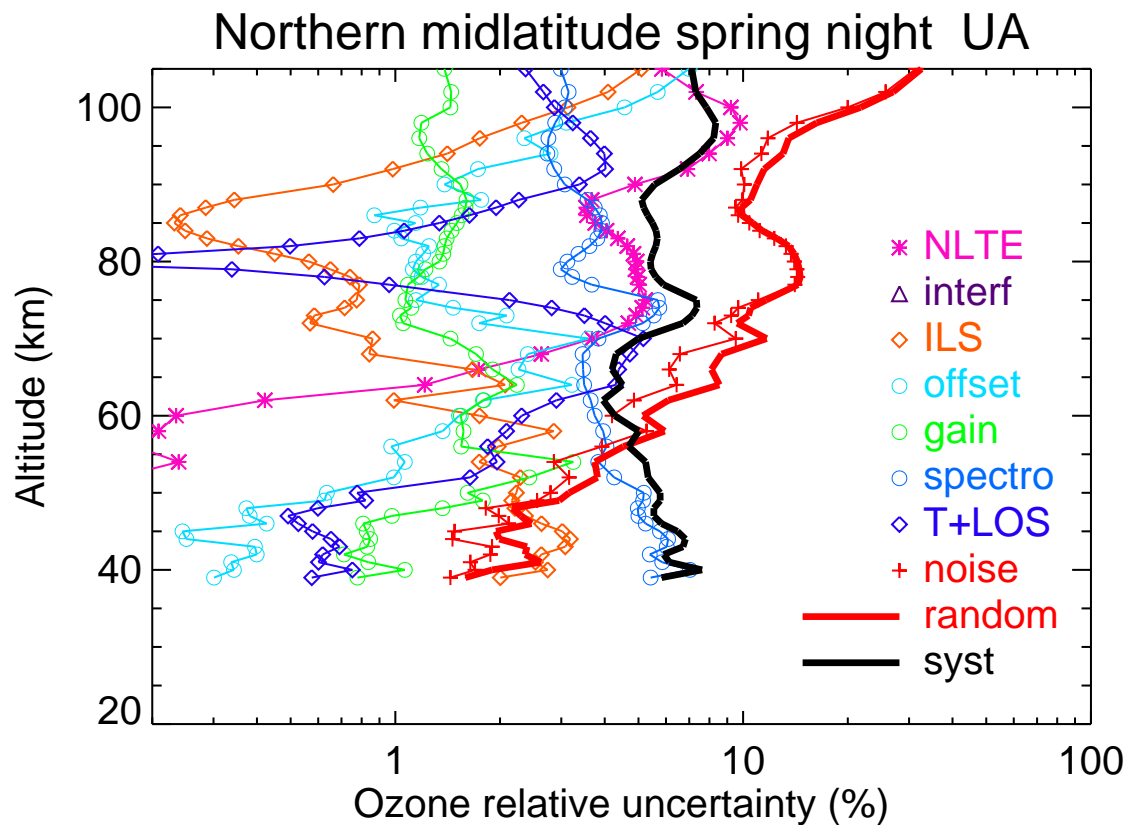

**Figure S46.** V8R\_O3\_661 Northern midlatitude spring night.

**Table S49.** Ozone error budget for Northern midlatitude summer day, UA. All uncertainties are  $1\sigma$ .

| altitude<br>(km) | mean O <sub>3</sub> vmr<br>(ppmv) | NLTE<br>(%) | interf<br>(%) | ILS<br>(%) | offset<br>(%) | gain<br>(%) | spectro<br>(%) | T+LOS<br>(%) | noise<br>(%) | random<br>(%) | syst<br>(%) |
|------------------|-----------------------------------|-------------|---------------|------------|---------------|-------------|----------------|--------------|--------------|---------------|-------------|
| 50               | 2.6                               | <0.1        | 0.1           | 2.3        | 0.6           | 1.5         | 5.2            | 0.7          | 2.6          | 2.9           | 5.8         |
| 60               | 1.1                               | 0.5         | <0.1          | 1.7        | 1.6           | 1.2         | 5.1            | 2.3          | 4.5          | 5.4           | 5.4         |
| 70               | 0.3                               | 6.5         | <0.1          | 0.9        | 2.4           | 1.2         | 7.1            | 2.5          | 12           | 13            | 9.2         |
| 80               | 0.2                               | 7.1         | <0.1          | 0.4        | 2.2           | 1.4         | 3.6            | 1.8          | 16           | 16            | 7.3         |
| 90               | 1.3                               | 12          | <0.1          | 2.5        | 5.4           | 0.9         | 3.8            | 2.5          | 20           | 22            | 10          |
| 96               | 0.7                               | 13          | <0.1          | 3.3        | 10            | 1.0         | 4.2            | 2.3          | 34           | 37            | 11          |

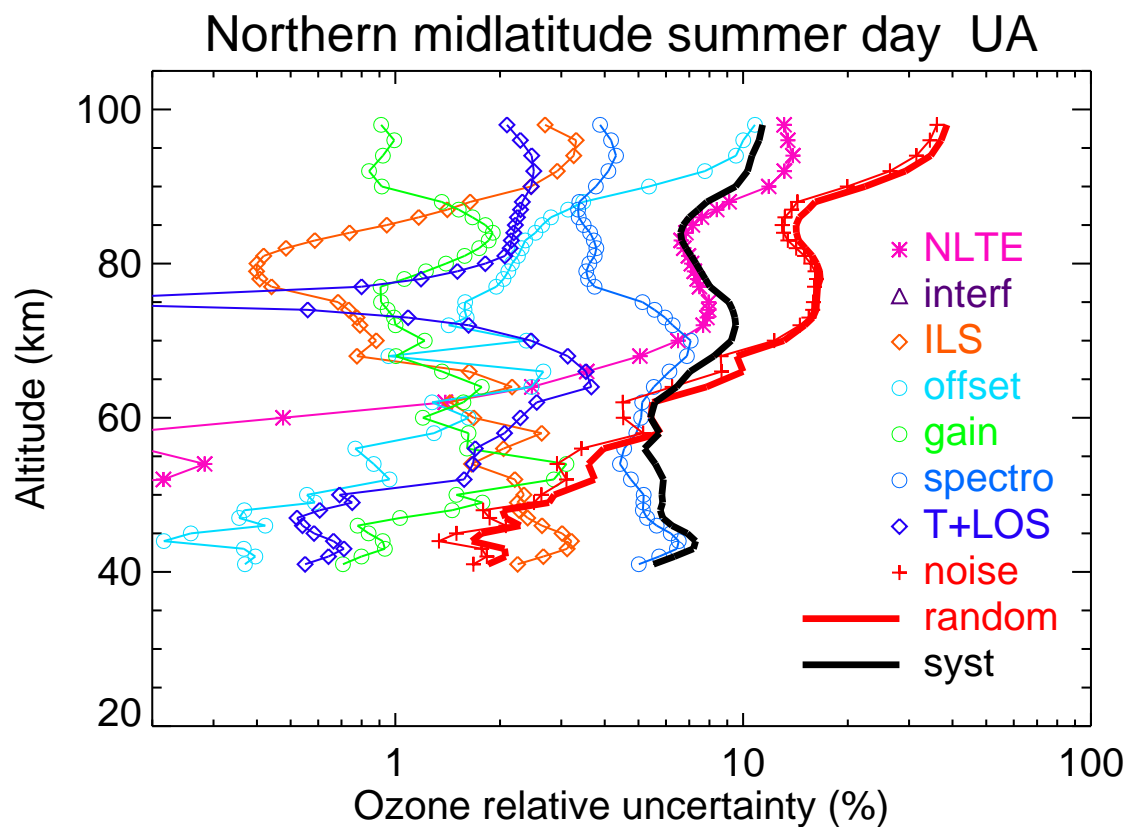

**Figure S47.** V8R\_O3\_661 Northern midlatitude summer day.

**Table S50.** Ozone error budget for Northern midlatitude summer night, UA. All uncertainties are  $1\sigma$ .

| altitude<br>(km) | mean O <sub>3</sub> vmr<br>(ppmv) | NLTE<br>(%) | interf<br>(%) | ILS<br>(%) | offset<br>(%) | gain<br>(%) | spectro<br>(%) | T+LOS<br>(%) | noise<br>(%) | random<br>(%) | syst<br>(%) |
|------------------|-----------------------------------|-------------|---------------|------------|---------------|-------------|----------------|--------------|--------------|---------------|-------------|
| 50               | 2.8                               | <0.1        | 0.1           | 2.2        | 0.5           | 1.5         | 4.9            | 0.6          | 2.6          | 2.8           | 5.5         |
| 60               | 1.5                               | 0.2         | <0.1          | 1.5        | 1.6           | 1.2         | 4.1            | 2.3          | 4.3          | 5.3           | 4.4         |
| 70               | 1.2                               | 4.7         | <0.1          | 1.4        | 3.2           | 1.3         | 4.4            | 4.2          | 10           | 11            | 6.2         |
| 80               | 0.1                               | 5.9         | <0.1          | 0.9        | 1.4           | 1.4         | 3.0            | 1.1          | 15           | 15            | 6.3         |
| 90               | 4.2                               | 6.8         | <0.1          | 1.2        | 1.9           | 1.2         | 3.1            | 3.3          | 12           | 13            | 6.7         |
| 96               | 6.0                               | 8.5         | <0.1          | 2.4        | 4.0           | 1.1         | 3.0            | 2.7          | 18           | 19            | 8.4         |
| 100              | 2.7                               | 9.0         | <0.1          | 3.7        | 6.7           | 1.2         | 3.3            | 2.1          | 29           | 30            | 8.6         |

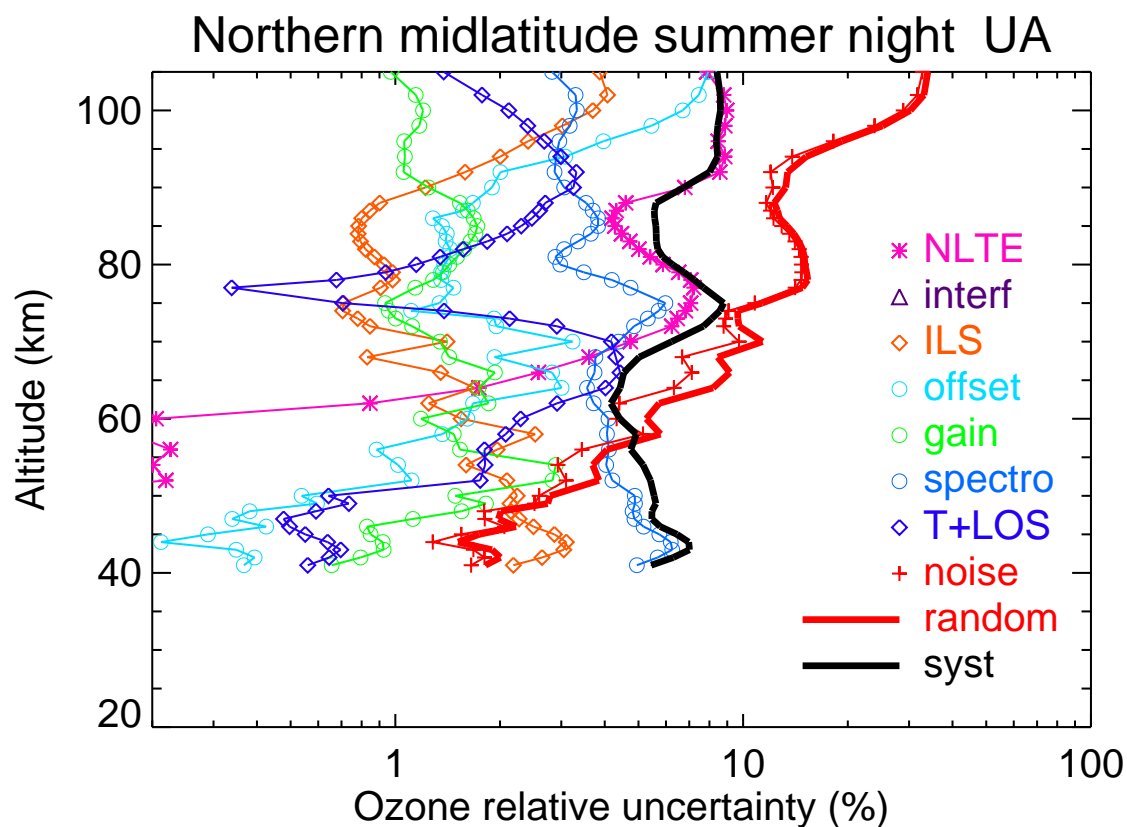

**Figure S48.** V8R\_O3\_661 Northern midlatitude summer night.

**Table S51.** Ozone error budget for Northern midlatitude autumn day, UA. All uncertainties are  $1\sigma$ .

| altitude<br>(km) | mean O <sub>3</sub> vmr<br>(ppmv) | NLTE<br>(%) | interf<br>(%) | ILS<br>(%) | offset<br>(%) | gain<br>(%) | spectro<br>(%) | T+LOS<br>(%) | noise<br>(%) | random<br>(%) | syst<br>(%) |
|------------------|-----------------------------------|-------------|---------------|------------|---------------|-------------|----------------|--------------|--------------|---------------|-------------|
| 50               | 2.7                               | <0.1        | 0.1           | 2.4        | 0.6           | 1.1         | 6.1            | 0.8          | 2.9          | 3.2           | 6.6         |
| 60               | 0.9                               | 0.6         | <0.1          | 1.9        | 1.9           | 1.4         | 5.5            | 2.5          | 5.7          | 6.6           | 5.8         |
| 70               | 0.2                               | 4.4         | <0.1          | 0.8        | 2.3           | 1.0         | 5.5            | 2.9          | 13           | 14            | 6.7         |
| 80               | 0.2                               | 5.0         | <0.1          | 0.7        | 2.5           | 1.2         | 3.6            | 0.1          | 16           | 17            | 5.8         |
| 90               | 1.0                               | 5.8         | <0.1          | 1.9        | 5.8           | 1.1         | 3.5            | 1.0          | 23           | 24            | 6.4         |
| 96               | 0.5                               | 8.0         | <0.1          | 2.9        | 9.2           | 0.7         | 3.8            | 1.4          | 35           | 37            | 7.6         |

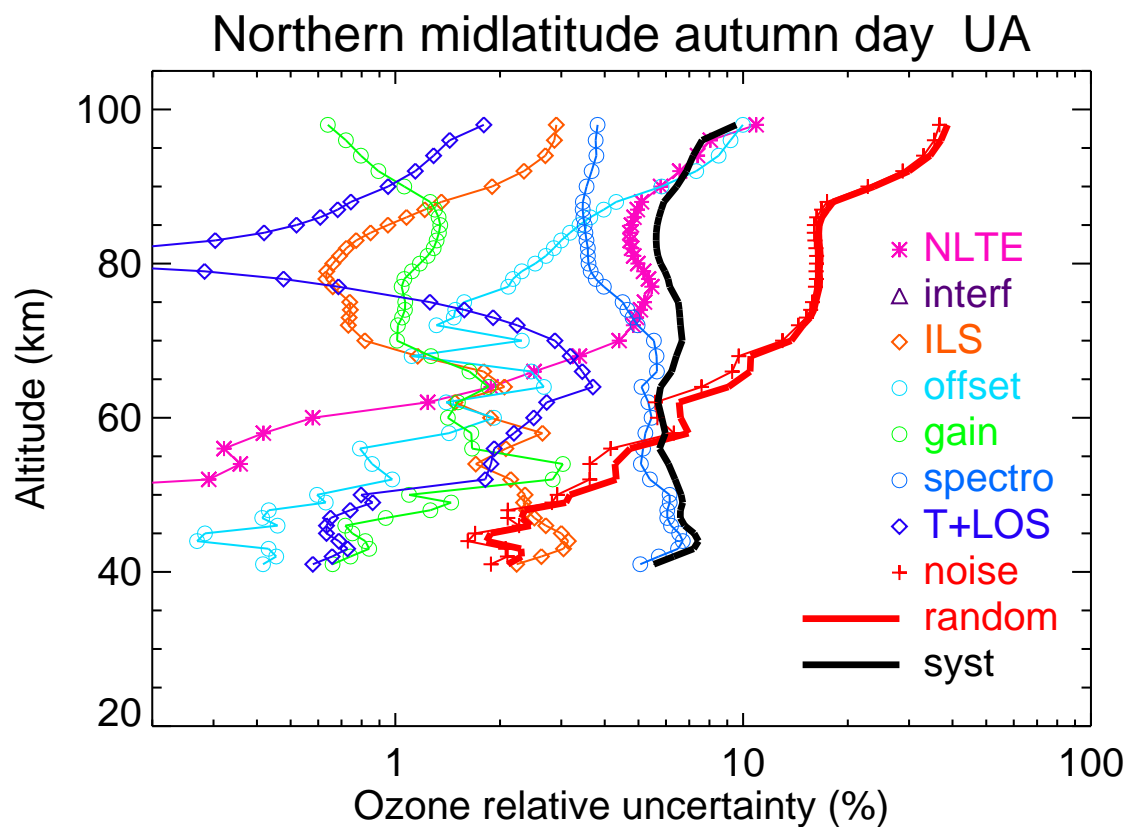

**Figure S49.** V8R\_O3\_661 Northern midlatitude autumn day.

**Table S52.** Ozone error budget for Northern midlatitude autumn night, UA. All uncertainties are  $1\sigma$ .

| altitude<br>(km) | mean O <sub>3</sub> vmr<br>(ppmv) | NLTE<br>(%) | interf<br>(%) | ILS<br>(%) | offset<br>(%) | gain<br>(%) | spectro<br>(%) | T+LOS<br>(%) | noise<br>(%) | random<br>(%) | syst<br>(%) |
|------------------|-----------------------------------|-------------|---------------|------------|---------------|-------------|----------------|--------------|--------------|---------------|-------------|
| 50               | 2.8                               | <0.1        | 0.1           | 2.3        | 0.7           | 1.3         | 6.1            | 0.8          | 3.1          | 3.5           | 6.6         |
| 60               | 1.4                               | 0.6         | <0.1          | 1.8        | 1.7           | 1.6         | 3.8            | 2.5          | 5.2          | 6.2           | 4.3         |
| 70               | 1.0                               | 2.7         | <0.1          | 1.0        | 3.4           | 1.7         | 4.6            | 4.8          | 10           | 12            | 4.8         |
| 80               | 0.4                               | 4.4         | <0.1          | 0.4        | 1.4           | 1.5         | 4.1            | 0.6          | 14           | 15            | 4.8         |
| 90               | 10                                | 5.0         | <0.1          | 0.7        | 1.7           | 1.6         | 2.9            | 1.4          | 11           | 11            | 5.4         |
| 96               | 11                                | 7.1         | <0.1          | 1.9        | 2.1           | 1.1         | 2.8            | 2.0          | 13           | 14            | 7.2         |
| 100              | 8.6                               | 5.6         | <0.1          | 3.6        | 4.5           | 2.8         | 2.9            | 2.1          | 21           | 22            | 6.2         |
| 110              | 1.5                               | 0.4         | <0.1          | 2.9        | 7.4           | 1.6         | 2.6            | 1.3          | 35           | 36            | 4.2         |

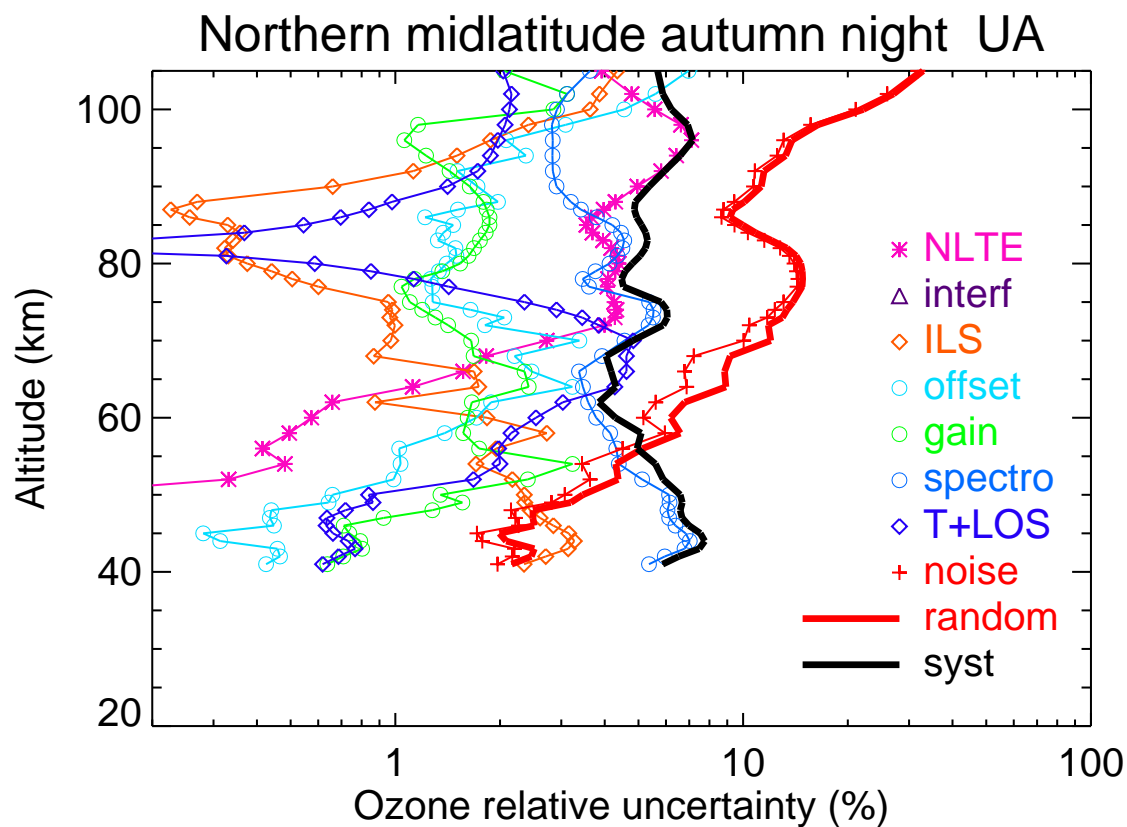

**Figure S50.** V8R\_O3\_661 Northern midlatitude autumn night.

**Table S53.** Ozone error budget for Tropics day, UA. All uncertainties are  $1\sigma$ .

| altitude<br>(km) | mean O <sub>3</sub> vmr<br>(ppmv) | NLTE<br>(%) | interf<br>(%) | ILS<br>(%) | offset<br>(%) | gain<br>(%) | spectro<br>(%) | T+LOS<br>(%) | noise<br>(%) | random<br>(%) | syst<br>(%) |
|------------------|-----------------------------------|-------------|---------------|------------|---------------|-------------|----------------|--------------|--------------|---------------|-------------|
| 40               | 6.6                               | <0.1        | 0.1           | 2.1        | 0.3           | 0.7         | 4.9            | 0.5          | 1.5          | 1.7           | 5.3         |
| 50               | 2.6                               | <0.1        | 0.1           | 2.3        | 0.6           | 1.4         | 5.3            | 0.8          | 2.6          | 3.0           | 5.8         |
| 60               | 1.1                               | 0.5         | <0.1          | 2.0        | 1.6           | 1.3         | 5.3            | 2.3          | 5.1          | 6.1           | 5.6         |
| 70               | 0.2                               | 5.6         | <0.1          | 0.7        | 1.9           | 0.8         | 6.8            | 2.9          | 12           | 13            | 8.6         |
| 80               | 0.2                               | 5.9         | <0.1          | 0.6        | 2.1           | 1.3         | 3.4            | 0.1          | 16           | 16            | 6.7         |
| 90               | 0.9                               | 6.1         | <0.1          | 1.7        | 4.5           | 1.1         | 3.3            | 1.2          | 19           | 20            | 6.3         |
| 96               | 0.7                               | 12          | <0.1          | 3.1        | 8.5           | 1.2         | 4.0            | 1.5          | 33           | 36            | 8.4         |
| 100              | 0.7                               | 14          | <0.1          | 3.0        | 9.3           | 1.8         | 3.9            | 1.7          | 36           | 39            | 12          |

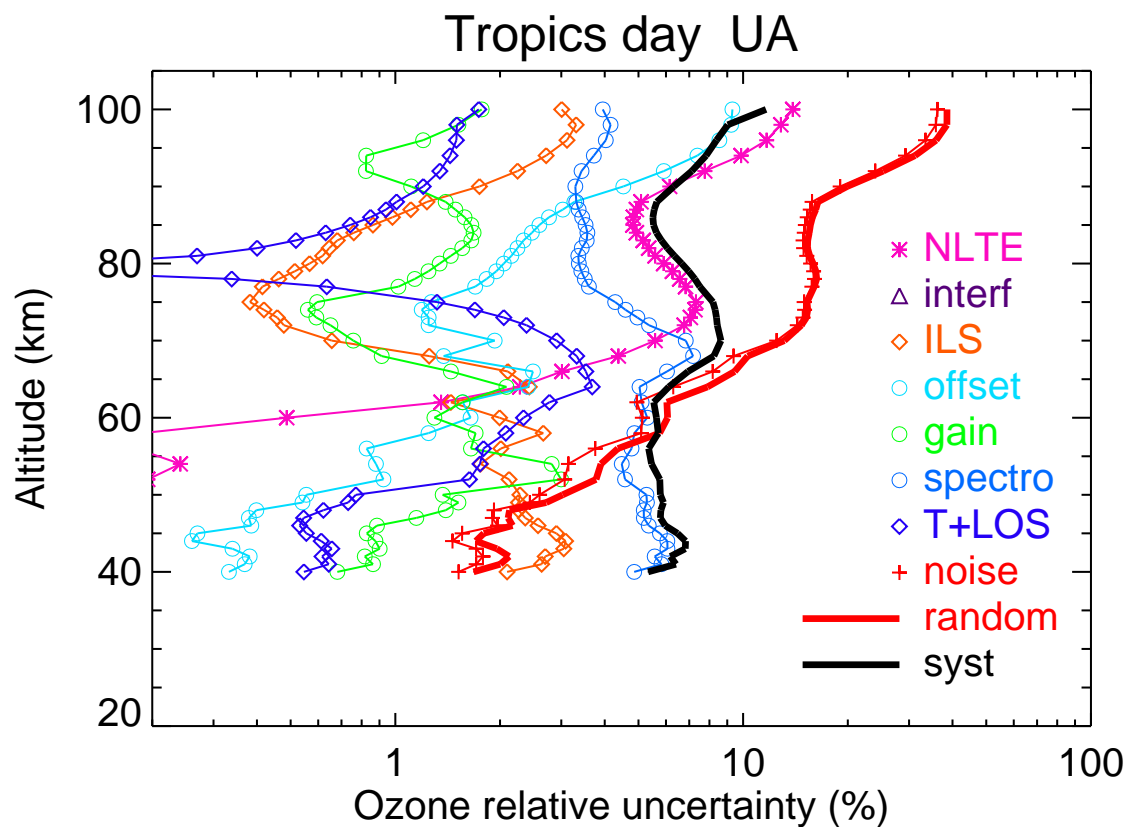

**Figure S51.** V8R\_O3\_661 Tropics day.

**Table S54.** Ozone error budget for Tropics night, UA. All uncertainties are  $1\sigma$ .

| altitude<br>(km) | mean O <sub>3</sub> vmr<br>(ppmv) | NLTE<br>(%) | interf<br>(%) | ILS<br>(%) | offset<br>(%) | gain<br>(%) | spectro<br>(%) | T+LOS<br>(%) | noise<br>(%) | random<br>(%) | syst<br>(%) |
|------------------|-----------------------------------|-------------|---------------|------------|---------------|-------------|----------------|--------------|--------------|---------------|-------------|
| 50               | 2.8                               | 0.1         | 0.2           | 2.2        | 0.7           | 1.8         | 5.2            | 0.9          | 2.9          | 3.2           | 5.9         |
| 60               | 1.4                               | 0.3         | <0.1          | 2.1        | 1.5           | 1.8         | 3.8            | 2.4          | 4.3          | 5.3           | 4.6         |
| 70               | 1.2                               | 5.9         | <0.1          | 1.2        | 3.2           | 1.4         | 4.2            | 5.7          | 11           | 13            | 6.9         |
| 80               | 0.7                               | 5.9         | <0.1          | 0.3        | 1.5           | 2.2         | 5.1            | 0.1          | 12           | 13            | 7.1         |
| 90               | 8.6                               | 6.9         | <0.1          | 0.8        | 1.4           | 1.5         | 2.8            | 2.0          | 10           | 10            | 7.2         |
| 96               | 15                                | 13          | <0.1          | 1.3        | 2.0           | 1.2         | 2.7            | 2.8          | 11           | 13            | 12          |
| 100              | 12                                | 10          | <0.1          | 2.4        | 3.8           | 1.0         | 2.8            | 3.2          | 17           | 18            | 10          |

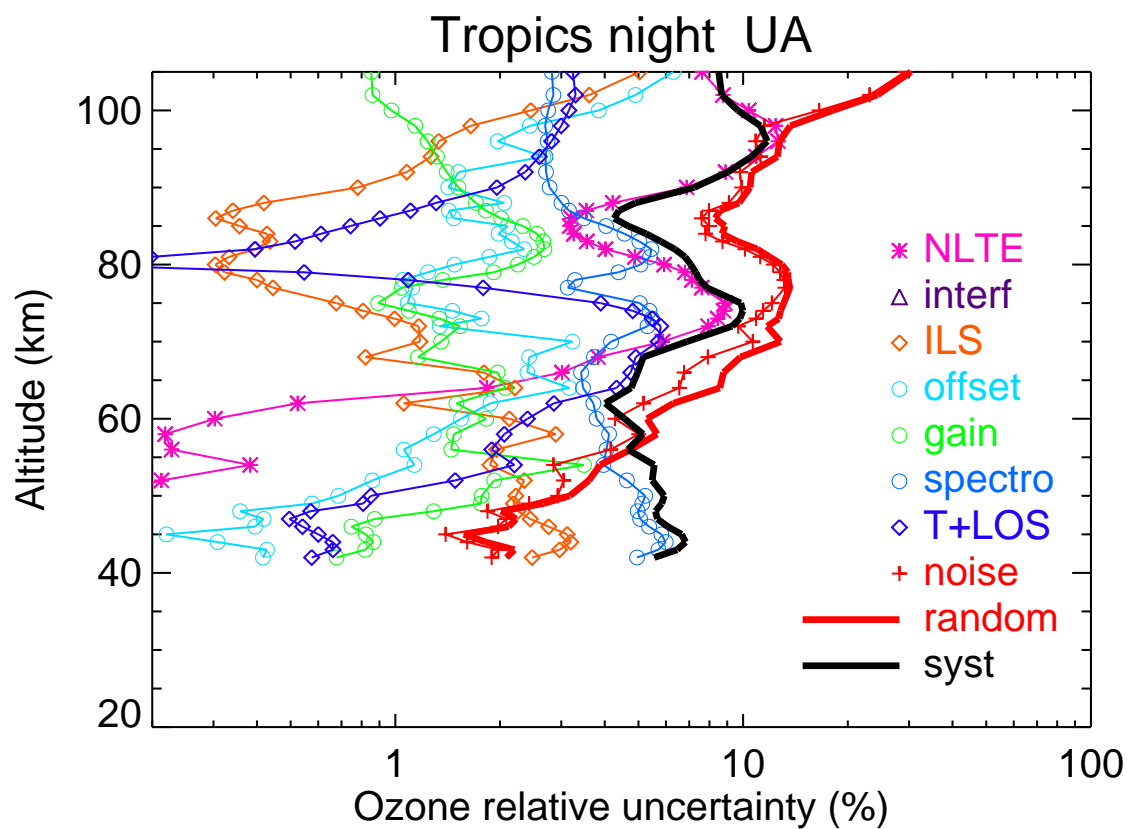

**Figure S52.** V8R\_O3\_661 Tropics night.



**Table S55.** Ozone error budget for Southern midlatitude winter day, UA. All uncertainties are  $1\sigma$ .

| altitude<br>(km) | mean O <sub>3</sub> vmr<br>(ppmv) | NLTE<br>(%) | interf<br>(%) | ILS<br>(%) | offset<br>(%) | gain<br>(%) | spectro<br>(%) | T+LOS<br>(%) | noise<br>(%) | random<br>(%) | syst<br>(%) |
|------------------|-----------------------------------|-------------|---------------|------------|---------------|-------------|----------------|--------------|--------------|---------------|-------------|
| 50               | 2.2                               | <0.1        | 0.2           | 2.3        | 0.8           | 1.2         | 6.2            | 0.9          | 3.4          | 4.2           | 6.4         |
| 60               | 0.7                               | 0.8         | <0.1          | 2.1        | 1.6           | 1.7         | 5.2            | 2.4          | 6.2          | 7.1           | 5.6         |
| 70               | 0.2                               | 3.9         | <0.1          | 1.3        | 1.7           | 1.2         | 5.5            | 2.3          | 13           | 14            | 6.4         |
| 80               | 0.1                               | 3.7         | <0.1          | 0.8        | 2.9           | 1.3         | 3.6            | 0.2          | 17           | 18            | 5.0         |
| 90               | 0.8                               | 5.3         | <0.1          | 2.0        | 6.6           | 1.1         | 3.6            | 1.0          | 25           | 26            | 6.2         |
| 96               | 0.4                               | 5.9         | <0.1          | 2.8        | 10            | 1.0         | 3.4            | 1.2          | 37           | 38            | 7.1         |

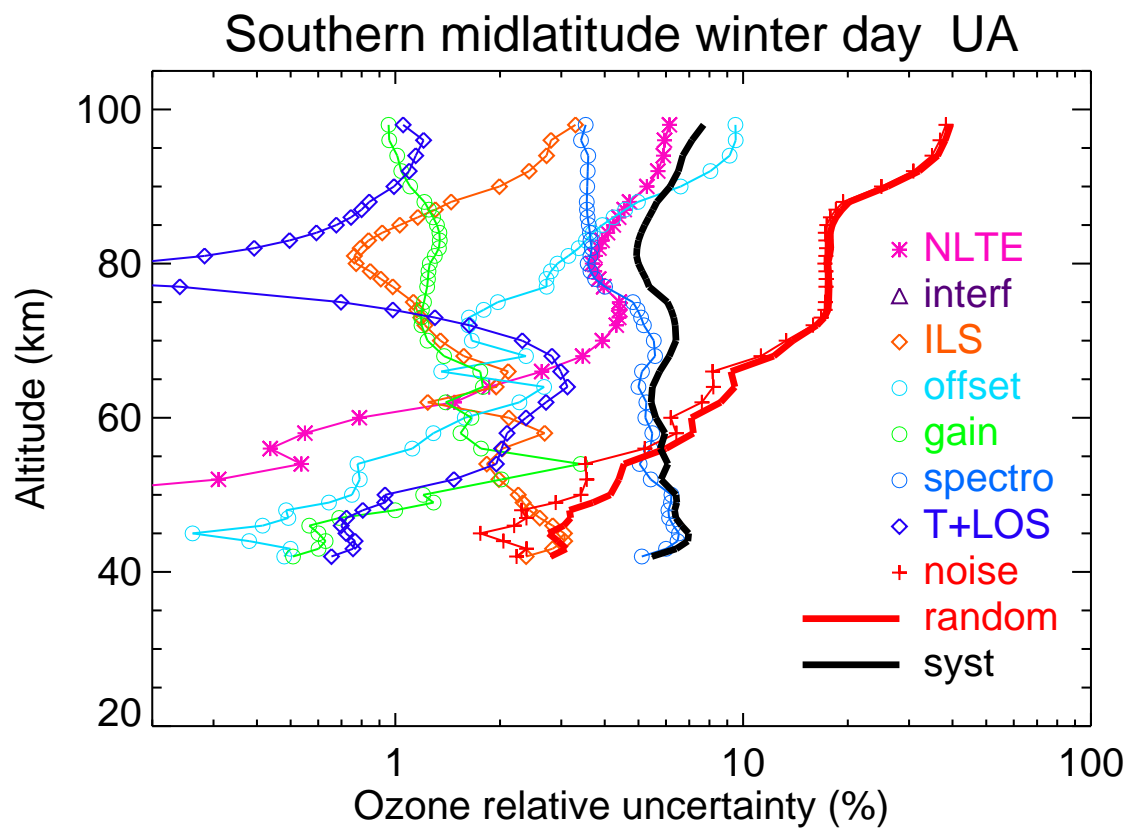

**Figure S53.** V8R\_O3\_661 Southern midlatitude winter day.

**Table S56.** Ozone error budget for Southern midlatitude winter night, UA. All uncertainties are  $1\sigma$ .

| altitude<br>(km) | mean O <sub>3</sub> vmr<br>(ppmv) | NLTE<br>(%) | interf<br>(%) | ILS<br>(%) | offset<br>(%) | gain<br>(%) | spectro<br>(%) | T+LOS<br>(%) | noise<br>(%) | random<br>(%) | syst<br>(%) |
|------------------|-----------------------------------|-------------|---------------|------------|---------------|-------------|----------------|--------------|--------------|---------------|-------------|
| 50               | 2.4                               | 0.1         | 0.1           | 2.3        | 0.7           | 1.3         | 6.2            | 0.9          | 3.3          | 4.0           | 6.5         |
| 60               | 1.3                               | 0.9         | <0.1          | 2.0        | 1.6           | 2.0         | 3.8            | 2.4          | 5.0          | 6.1           | 4.5         |
| 70               | 0.9                               | 3.3         | <0.1          | 1.3        | 3.2           | 1.7         | 4.8            | 4.1          | 10           | 12            | 4.9         |
| 80               | 0.4                               | 3.9         | <0.1          | 0.6        | 1.4           | 1.7         | 3.8            | <0.1         | 14           | 15            | 4.3         |
| 90               | 5.1                               | 4.5         | <0.1          | 1.3        | 1.3           | 1.3         | 3.0            | 1.8          | 12           | 13            | 5.0         |
| 96               | 6.2                               | 5.0         | <0.1          | 3.1        | 4.0           | 1.0         | 2.9            | 1.7          | 18           | 19            | 6.0         |
| 100              | 3.3                               | 4.7         | <0.1          | 4.3        | 7.0           | 1.0         | 2.9            | 1.3          | 30           | 31            | 6.5         |

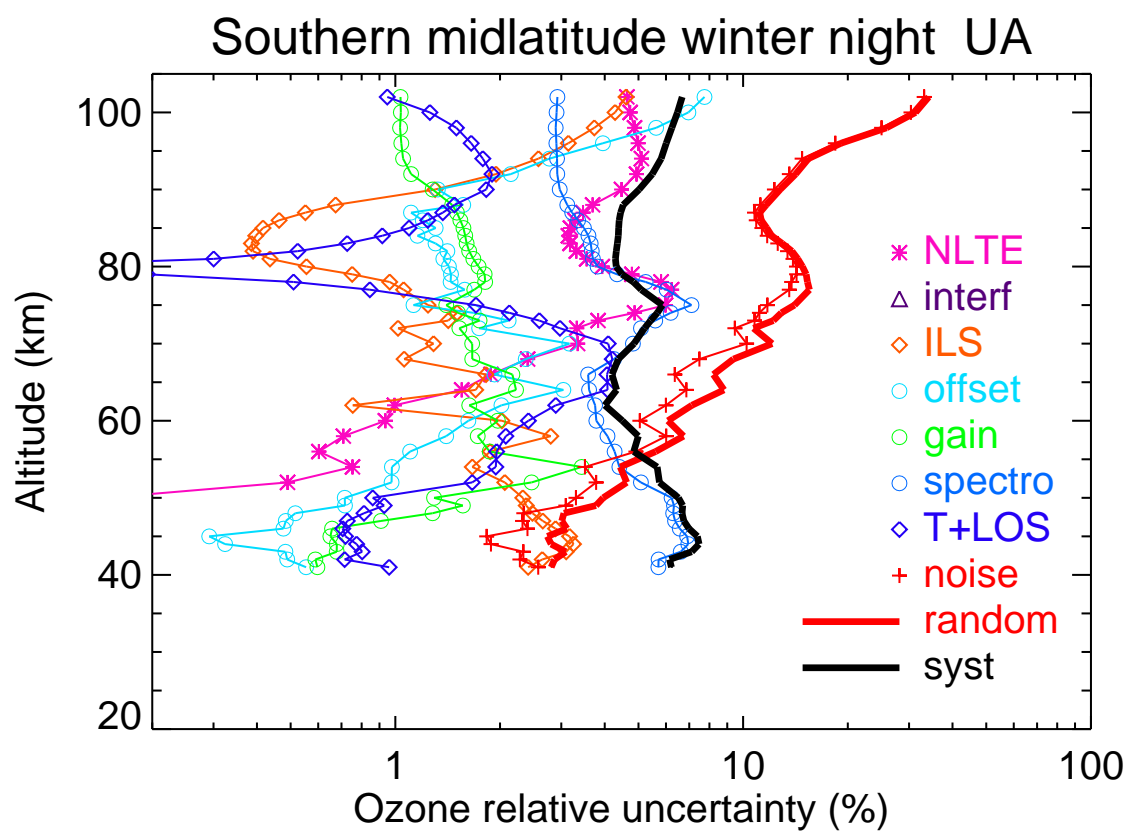

**Figure S54.** V8R\_O3\_661 Southern midlatitude winter night.

**Table S57.** Ozone error budget for Southern midlatitude spring day, UA. All uncertainties are  $1\sigma$ .

| altitude<br>(km) | mean O <sub>3</sub> vmr<br>(ppmv) | NLTE<br>(%) | interf<br>(%) | ILS<br>(%) | offset<br>(%) | gain<br>(%) | spectro<br>(%) | T+LOS<br>(%) | noise<br>(%) | random<br>(%) | syst<br>(%) |
|------------------|-----------------------------------|-------------|---------------|------------|---------------|-------------|----------------|--------------|--------------|---------------|-------------|
| 50               | 2.5                               | <0.1        | 0.2           | 2.3        | 0.7           | 1.6         | 5.7            | 0.9          | 3.0          | 3.5           | 6.2         |
| 60               | 0.9                               | 0.5         | <0.1          | 2.1        | 1.4           | 1.7         | 5.0            | 2.2          | 4.8          | 5.6           | 5.6         |
| 70               | 0.2                               | 4.7         | <0.1          | 0.7        | 2.0           | 1.0         | 5.1            | 2.5          | 12           | 13            | 6.7         |
| 80               | 0.2                               | 5.8         | <0.1          | 0.6        | 2.0           | 1.2         | 3.6            | 0.2          | 15           | 15            | 6.6         |
| 90               | 0.8                               | 6.2         | <0.1          | 1.9        | 5.2           | 1.1         | 3.5            | 1.3          | 21           | 22            | 6.4         |
| 96               | 0.5                               | 10          | <0.1          | 3.2        | 8.5           | 1.0         | 3.7            | 2.0          | 34           | 36            | 8.3         |
| 100              | 0.5                               | 11          | <0.1          | 3.0        | 8.7           | 0.8         | 3.0            | 2.2          | 36           | 37            | 12          |

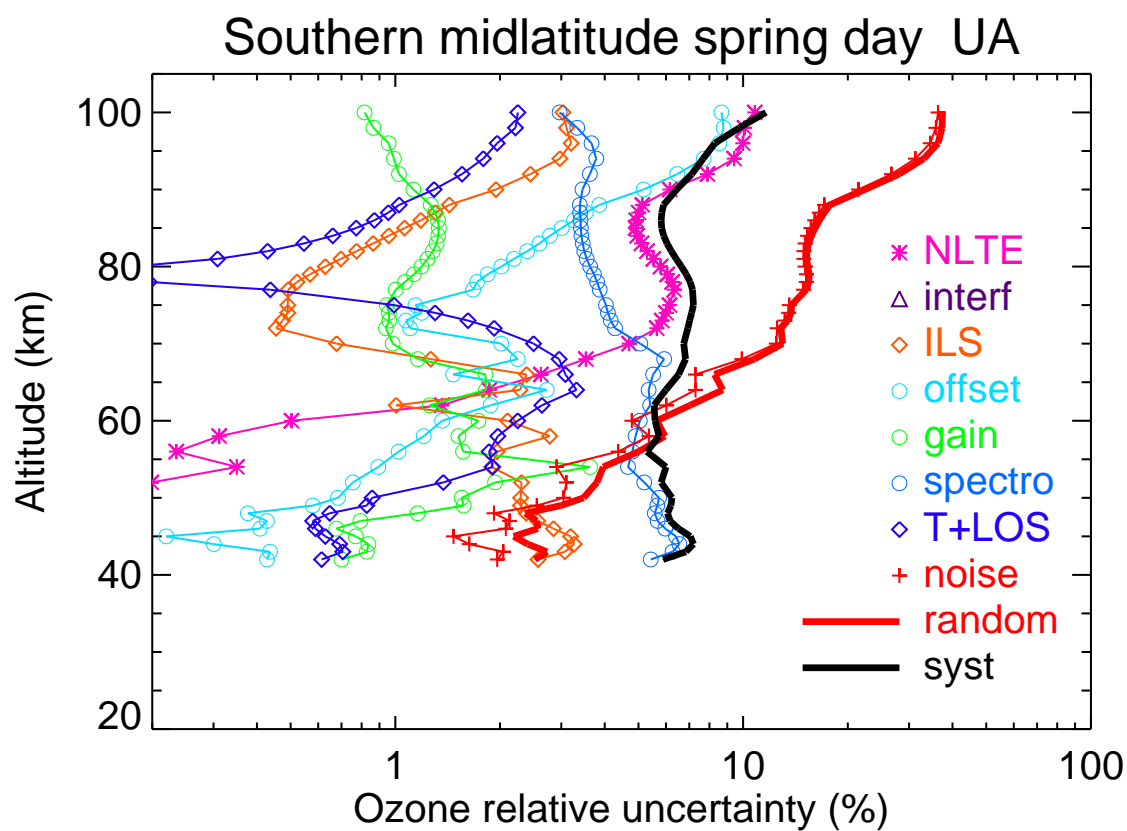

**Figure S55.** V8R\_O3\_661 Southern midlatitude spring day.

**Table S58.** Ozone error budget for Southern midlatitude spring night, UA. All uncertainties are  $1\sigma$ .

| altitude<br>(km) | mean O <sub>3</sub> vmr<br>(ppmv) | NLTE<br>(%) | interf<br>(%) | ILS<br>(%) | offset<br>(%) | gain<br>(%) | spectro<br>(%) | T+LOS<br>(%) | noise<br>(%) | random<br>(%) | syst<br>(%) |
|------------------|-----------------------------------|-------------|---------------|------------|---------------|-------------|----------------|--------------|--------------|---------------|-------------|
| 50               | 2.7                               | <0.1        | 0.2           | 2.2        | 0.7           | 1.7         | 5.3            | 0.8          | 2.9          | 3.2           | 5.9         |
| 60               | 1.4                               | 0.3         | <0.1          | 2.1        | 1.5           | 1.7         | 3.7            | 2.3          | 4.3          | 5.2           | 4.5         |
| 70               | 1.2                               | 3.6         | <0.1          | 0.6        | 3.4           | 1.4         | 3.7            | 4.8          | 10           | 11            | 4.8         |
| 80               | 0.2                               | 5.0         | <0.1          | 0.4        | 1.1           | 1.1         | 3.2            | 0.2          | 14           | 14            | 5.5         |
| 90               | 8.1                               | 6.3         | <0.1          | 1.2        | 1.0           | 1.6         | 3.1            | 2.9          | 10           | 11            | 6.4         |
| 96               | 13                                | 8.5         | <0.1          | 2.2        | 2.0           | 1.4         | 2.7            | 3.2          | 11           | 12            | 8.5         |
| 100              | 7.7                               | 7.6         | <0.1          | 3.5        | 4.8           | 1.1         | 2.8            | 2.7          | 22           | 23            | 8.0         |

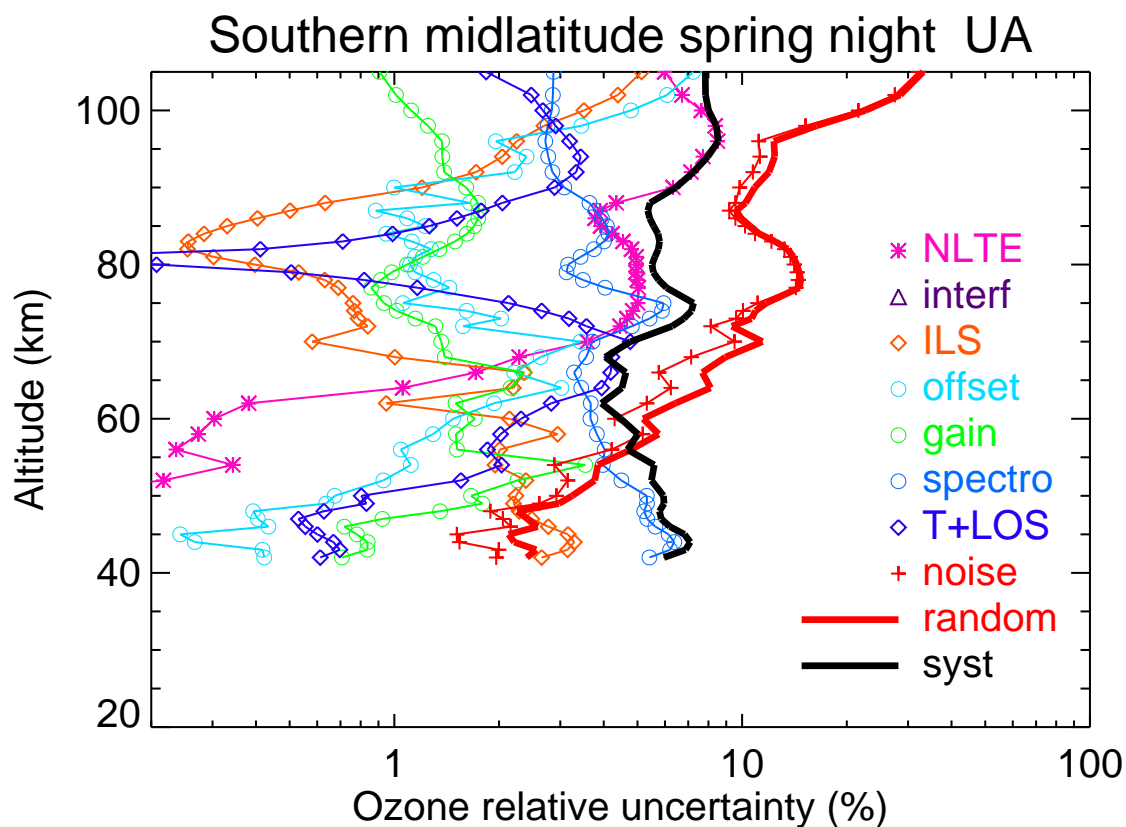

**Figure S56.** V8R\_O3\_661 Southern midlatitude spring night.

**Table S59.** Ozone error budget for Southern midlatitude summer day, UA. All uncertainties are  $1\sigma$ .

| altitude<br>(km) | mean O <sub>3</sub> vmr<br>(ppmv) | NLTE<br>(%) | interf<br>(%) | ILS<br>(%) | offset<br>(%) | gain<br>(%) | spectro<br>(%) | T+LOS<br>(%) | noise<br>(%) | random<br>(%) | syst<br>(%) |
|------------------|-----------------------------------|-------------|---------------|------------|---------------|-------------|----------------|--------------|--------------|---------------|-------------|
| 50               | 2.4                               | <0.1        | 0.2           | 2.2        | 0.7           | 1.7         | 5.1            | 0.8          | 2.8          | 3.1           | 5.8         |
| 60               | 1.0                               | 0.5         | <0.1          | 2.3        | 1.3           | 2.1         | 4.5            | 2.6          | 3.9          | 5.0           | 5.5         |
| 70               | 0.3                               | 5.7         | <0.1          | 0.5        | 2.5           | 0.7         | 6.6            | 2.9          | 12           | 13            | 8.6         |
| 80               | 0.2                               | 7.1         | <0.1          | 0.3        | 2.0           | 1.2         | 3.6            | 1.6          | 15           | 16            | 7.3         |
| 90               | 1.1                               | 8.8         | <0.1          | 1.9        | 4.7           | 1.0         | 3.6            | 2.2          | 19           | 20            | 8.5         |
| 96               | 0.6                               | 11          | <0.1          | 3.3        | 8.7           | 0.8         | 4.0            | 2.2          | 34           | 36            | 11          |
| 100              | 0.4                               | 8.9         | <0.1          | 3.2        | 10            | 0.4         | 3.7            | 1.5          | 38           | 39            | 10          |

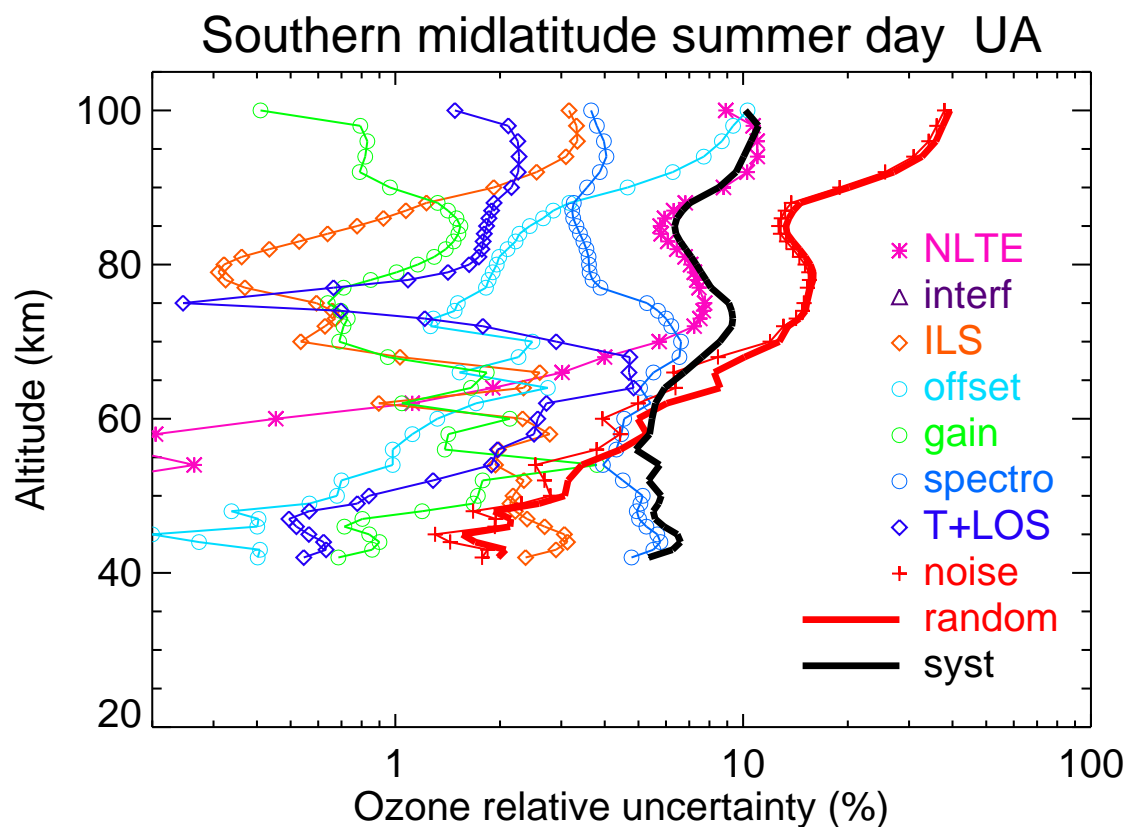

**Figure S57.** V8R\_O3\_661 Southern midlatitude summer day.

**Table S60.** Ozone error budget for Southern midlatitude summer night, UA. All uncertainties are  $1\sigma$ .

| altitude<br>(km) | mean O <sub>3</sub> vmr<br>(ppmv) | NLTE<br>(%) | interf<br>(%) | ILS<br>(%) | offset<br>(%) | gain<br>(%) | spectro<br>(%) | T+LOS<br>(%) | noise<br>(%) | random<br>(%) | syst<br>(%) |
|------------------|-----------------------------------|-------------|---------------|------------|---------------|-------------|----------------|--------------|--------------|---------------|-------------|
| 50               | 2.8                               | <0.1        | 0.2           | 2.2        | 0.7           | 1.8         | 5.0            | 0.8          | 2.8          | 3.1           | 5.7         |
| 60               | 1.4                               | 0.3         | <0.1          | 2.3        | 1.5           | 2.0         | 3.7            | 2.3          | 4.2          | 5.2           | 4.7         |
| 70               | 1.1                               | 4.5         | <0.1          | 1.0        | 3.4           | 1.3         | 3.6            | 4.7          | 9.2          | 11            | 5.6         |
| 80               | 0.1                               | 6.0         | <0.1          | 0.9        | 1.4           | 1.4         | 3.2            | 1.0          | 15           | 15            | 6.4         |
| 90               | 3.4                               | 5.4         | <0.1          | 1.6        | 1.4           | 1.3         | 3.3            | 2.4          | 12           | 13            | 6.0         |
| 96               | 6.4                               | 7.7         | <0.1          | 1.9        | 3.0           | 1.1         | 2.8            | 2.1          | 14           | 15            | 7.6         |
| 100              | 3.9                               | 7.4         | <0.1          | 2.9        | 6.1           | 1.0         | 3.0            | 1.8          | 26           | 27            | 7.7         |

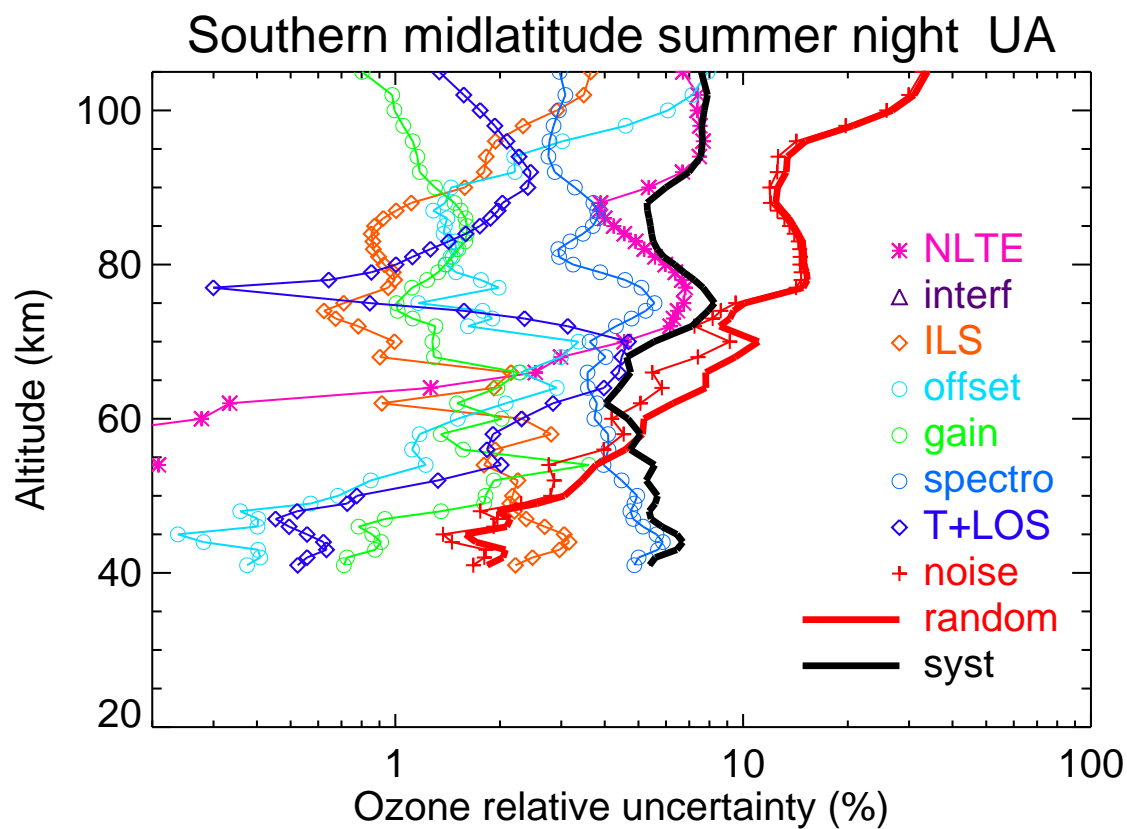

**Figure S58.** V8R\_O3\_661 Southern midlatitude summer night.

**Table S61.** Ozone error budget for Southern midlatitude autumn day, UA. All uncertainties are  $1\sigma$ .

| altitude<br>(km) | mean O <sub>3</sub> vmr<br>(ppmv) | NLTE<br>(%) | interf<br>(%) | ILS<br>(%) | offset<br>(%) | gain<br>(%) | spectro<br>(%) | T+LOS<br>(%) | noise<br>(%) | random<br>(%) | syst<br>(%) |
|------------------|-----------------------------------|-------------|---------------|------------|---------------|-------------|----------------|--------------|--------------|---------------|-------------|
| 50               | 2.7                               | <0.1        | 0.1           | 2.4        | 0.7           | 1.3         | 6.7            | 1.0          | 3.4          | 3.7           | 7.2         |
| 60               | 0.8                               | 0.8         | <0.1          | 1.9        | 1.6           | 1.6         | 5.8            | 2.6          | 6.4          | 7.3           | 6.2         |
| 70               | 0.3                               | 2.4         | <0.1          | 1.2        | 1.8           | 1.5         | 5.3            | 2.3          | 12           | 12            | 5.8         |
| 80               | 0.1                               | 4.5         | <0.1          | 0.7        | 3.1           | 1.1         | 3.7            | <0.1         | 17           | 18            | 5.7         |
| 90               | 0.9                               | 6.7         | <0.1          | 1.8        | 6.4           | 1.1         | 3.6            | 1.0          | 24           | 25            | 6.9         |
| 96               | 0.6                               | 9.3         | <0.1          | 2.8        | 9.0           | 0.8         | 3.8            | 1.5          | 35           | 37            | 8.6         |

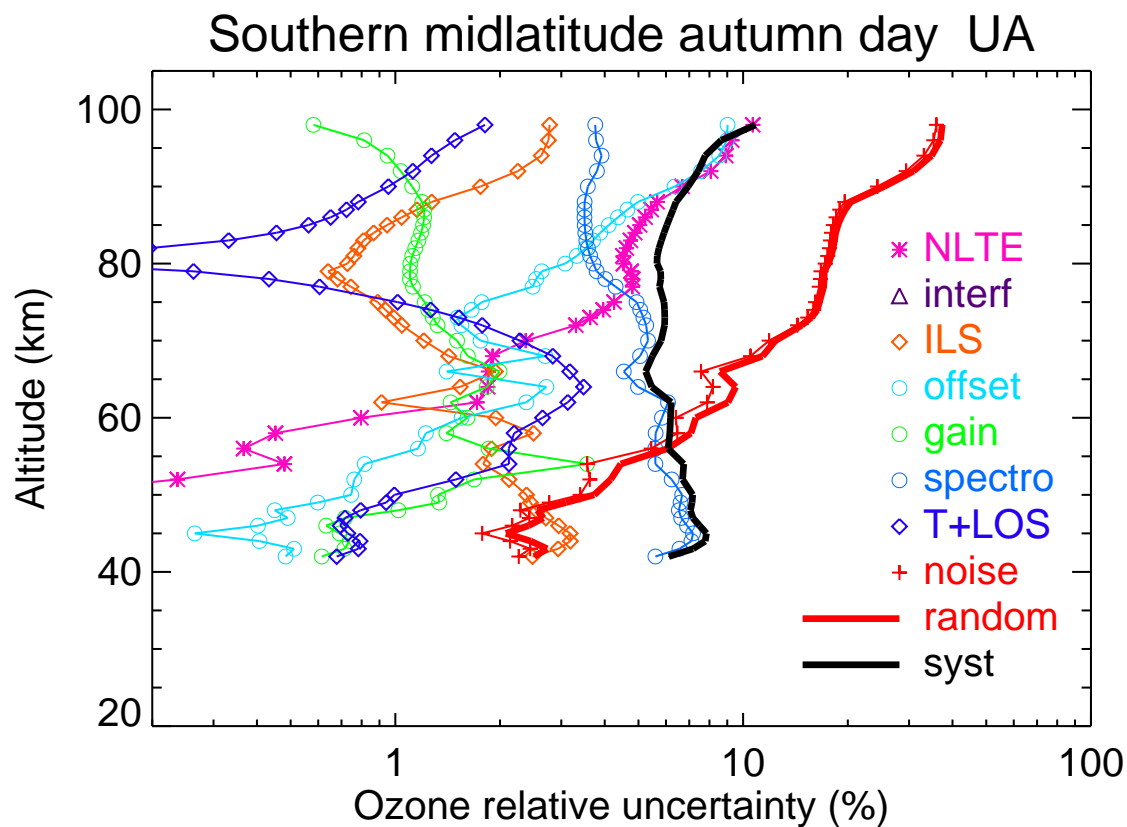

**Figure S59.** V8R\_O3\_661 Southern midlatitude autumn day.

**Table S62.** Ozone error budget for Southern midlatitude autumn night, UA. All uncertainties are  $1\sigma$ .

| altitude<br>(km) | mean O <sub>3</sub> vmr<br>(ppmv) | NLTE<br>(%) | interf<br>(%) | ILS<br>(%) | offset<br>(%) | gain<br>(%) | spectro<br>(%) | T+LOS<br>(%) | noise<br>(%) | random<br>(%) | syst<br>(%) |
|------------------|-----------------------------------|-------------|---------------|------------|---------------|-------------|----------------|--------------|--------------|---------------|-------------|
| 50               | 2.8                               | <0.1        | 0.1           | 2.3        | 0.7           | 1.5         | 5.9            | 0.9          | 3.3          | 3.5           | 6.5         |
| 60               | 1.4                               | 0.5         | <0.1          | 2.0        | 1.5           | 1.6         | 4.3            | 2.7          | 5.8          | 6.8           | 4.7         |
| 70               | 1.0                               | 1.7         | <0.1          | 1.2        | 3.0           | 1.9         | 5.0            | 4.4          | 10           | 11            | 5.3         |
| 80               | 0.3                               | 3.8         | <0.1          | 0.3        | 1.2           | 1.0         | 3.3            | 0.6          | 15           | 15            | 4.4         |
| 90               | 10                                | 6.5         | <0.1          | 0.6        | 1.3           | 1.6         | 3.1            | 1.6          | 11           | 11            | 6.7         |
| 96               | 11                                | 7.4         | <0.1          | 2.3        | 2.4           | 1.1         | 2.7            | 1.9          | 14           | 14            | 7.4         |
| 100              | 6.6                               | 6.6         | <0.1          | 3.7        | 5.5           | 1.1         | 2.7            | 2.0          | 25           | 26            | 7.1         |

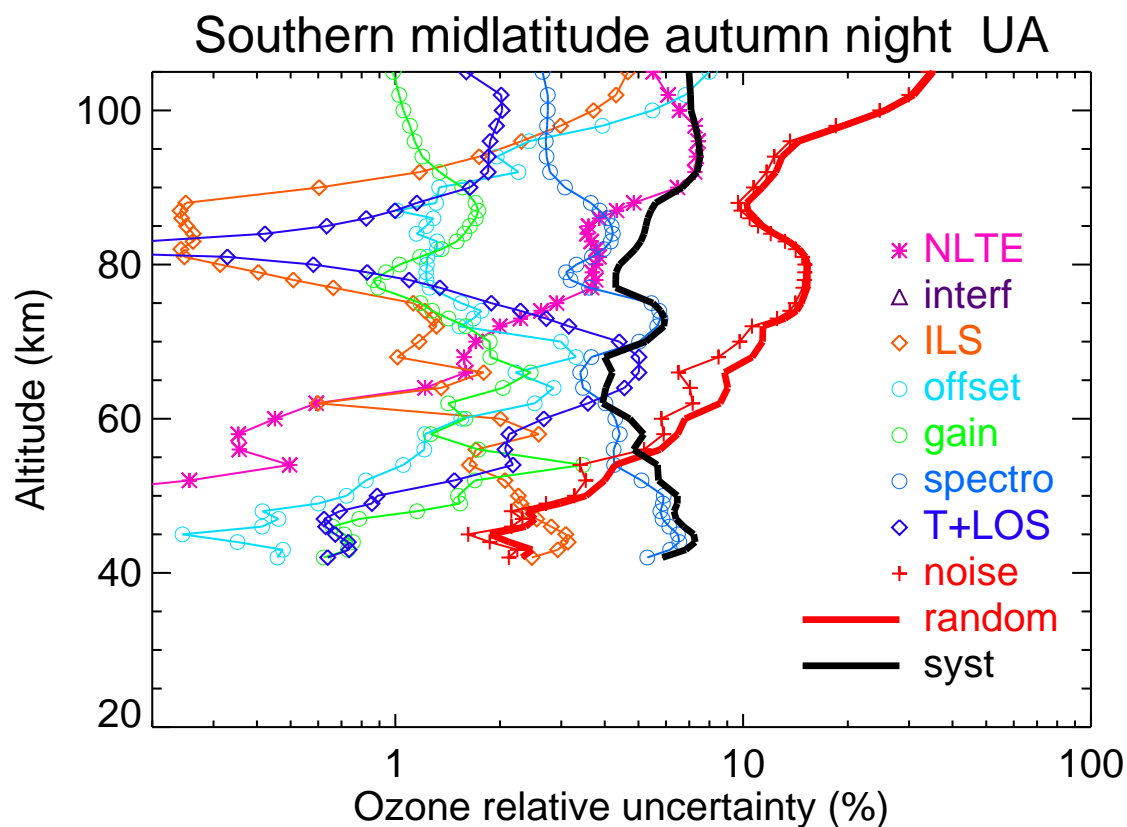

**Figure S60.** V8R\_O3\_661 Southern midlatitude autumn night.



**Table S63.** Ozone error budget for Southern polar winter day, UA. All uncertainties are  $1\sigma$ .

| altitude<br>(km) | mean O <sub>3</sub> vmr<br>(ppmv) | NLTE<br>(%) | interf<br>(%) | ILS<br>(%) | offset<br>(%) | gain<br>(%) | spectro<br>(%) | T+LOS<br>(%) | noise<br>(%) | random<br>(%) | syst<br>(%) |
|------------------|-----------------------------------|-------------|---------------|------------|---------------|-------------|----------------|--------------|--------------|---------------|-------------|
| 50               | 1.5                               | 0.2         | 0.2           | 1.8        | 0.8           | 0.9         | 5.2            | 0.9          | 3.7          | 4.2           | 5.4         |
| 60               | 0.5                               | 0.8         | <0.1          | 2.4        | 1.4           | 1.7         | 4.5            | 1.8          | 6.0          | 6.6           | 5.2         |
| 70               | 0.1                               | 2.6         | <0.1          | 1.4        | 1.3           | 1.2         | 5.1            | 1.5          | 15           | 15            | 5.6         |
| 80               | 0.1                               | 3.8         | <0.1          | 0.8        | 3.6           | 1.1         | 3.7            | 0.2          | 18           | 19            | 5.0         |
| 90               | 0.6                               | 5.5         | <0.1          | 2.1        | 7.4           | 1.1         | 3.6            | 1.0          | 27           | 28            | 6.0         |
| 96               | 0.4                               | 6.5         | <0.1          | 2.7        | 10            | 0.9         | 3.5            | 1.1          | 38           | 40            | 7.0         |

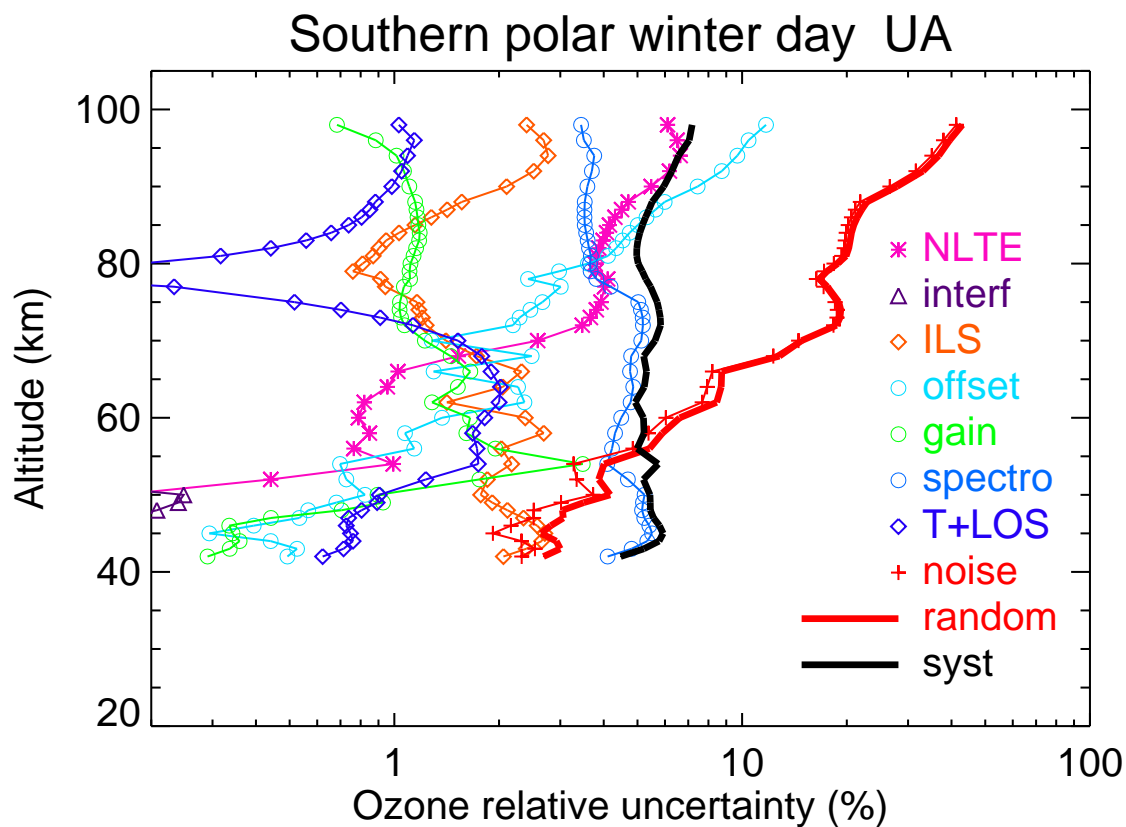

**Figure S61.** V8R\_O3\_661 Southern polar winter day.

**Table S64.** Ozone error budget for Southern polar winter night, UA. All uncertainties are  $1\sigma$ .

| altitude<br>(km) | mean O <sub>3</sub> vmr<br>(ppmv) | NLTE<br>(%) | interf<br>(%) | ILS<br>(%) | offset<br>(%) | gain<br>(%) | spectro<br>(%) | T+LOS<br>(%) | noise<br>(%) | random<br>(%) | syst<br>(%) |
|------------------|-----------------------------------|-------------|---------------|------------|---------------|-------------|----------------|--------------|--------------|---------------|-------------|
| 50               | 1.4                               | 0.5         | 0.2           | 1.5        | 0.9           | 1.2         | 5.4            | 0.9          | 4.0          | 4.4           | 5.6         |
| 60               | 1.4                               | 2.1         | <0.1          | 2.5        | 1.4           | 2.0         | 3.2            | 1.9          | 5.6          | 6.3           | 4.7         |
| 70               | 1.7                               | 2.7         | <0.1          | 0.6        | 2.9           | 2.1         | 4.5            | 4.6          | 8.6          | 11            | 4.4         |
| 80               | 0.8                               | 2.8         | <0.1          | 0.7        | 1.2           | 1.6         | 3.4            | 0.9          | 13           | 13            | 3.8         |
| 90               | 6.9                               | 6.2         | <0.1          | 1.5        | 1.6           | 1.2         | 3.1            | 0.9          | 13           | 13            | 6.4         |
| 96               | 7.9                               | 6.9         | <0.1          | 3.6        | 3.9           | 0.9         | 3.0            | 1.8          | 18           | 19            | 7.6         |
| 100              | 5.0                               | 6.8         | <0.1          | 5.0        | 6.8           | 0.9         | 3.1            | 2.3          | 29           | 30            | 8.2         |

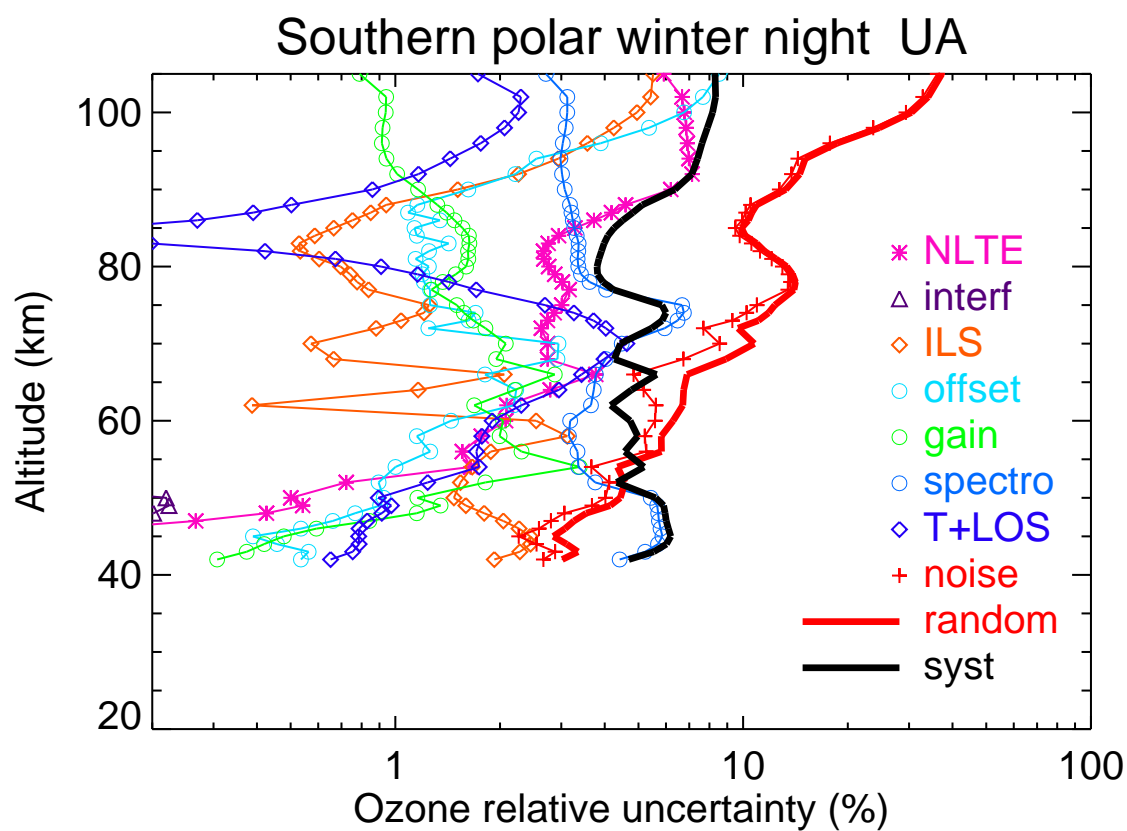

**Figure S62.** V8R\_O3\_661 Southern polar winter night.

**Table S65.** Ozone error budget for Southern polar spring day, UA. All uncertainties are  $1\sigma$ .

| altitude<br>(km) | mean O <sub>3</sub> vmr<br>(ppmv) | NLTE<br>(%) | interf<br>(%) | ILS<br>(%) | offset<br>(%) | gain<br>(%) | spectro<br>(%) | T+LOS<br>(%) | noise<br>(%) | random<br>(%) | syst<br>(%) |
|------------------|-----------------------------------|-------------|---------------|------------|---------------|-------------|----------------|--------------|--------------|---------------|-------------|
| 50               | 2.3                               | <0.1        | 0.2           | 2.3        | 0.7           | 1.7         | 4.9            | 0.9          | 2.8          | 3.2           | 5.6         |
| 60               | 0.9                               | 0.2         | <0.1          | 2.4        | 1.1           | 2.1         | 4.5            | 2.0          | 4.1          | 4.8           | 5.4         |
| 70               | 0.3                               | 4.4         | <0.1          | 0.8        | 2.2           | 0.9         | 5.7            | 2.0          | 11           | 12            | 7.1         |
| 80               | 0.1                               | 6.7         | <0.1          | 0.5        | 2.0           | 1.1         | 3.7            | 0.6          | 15           | 16            | 6.9         |
| 90               | 0.7                               | 6.4         | <0.1          | 2.1        | 4.6           | 1.2         | 3.1            | 1.9          | 19           | 20            | 6.2         |
| 96               | 0.4                               | 9.0         | <0.1          | 3.5        | 8.2           | 1.0         | 3.4            | 2.3          | 34           | 36            | 7.8         |
| 100              | 0.4                               | 6.5         | <0.1          | 3.6        | 11            | 0.7         | 2.9            | 1.9          | 40           | 42            | 8.0         |

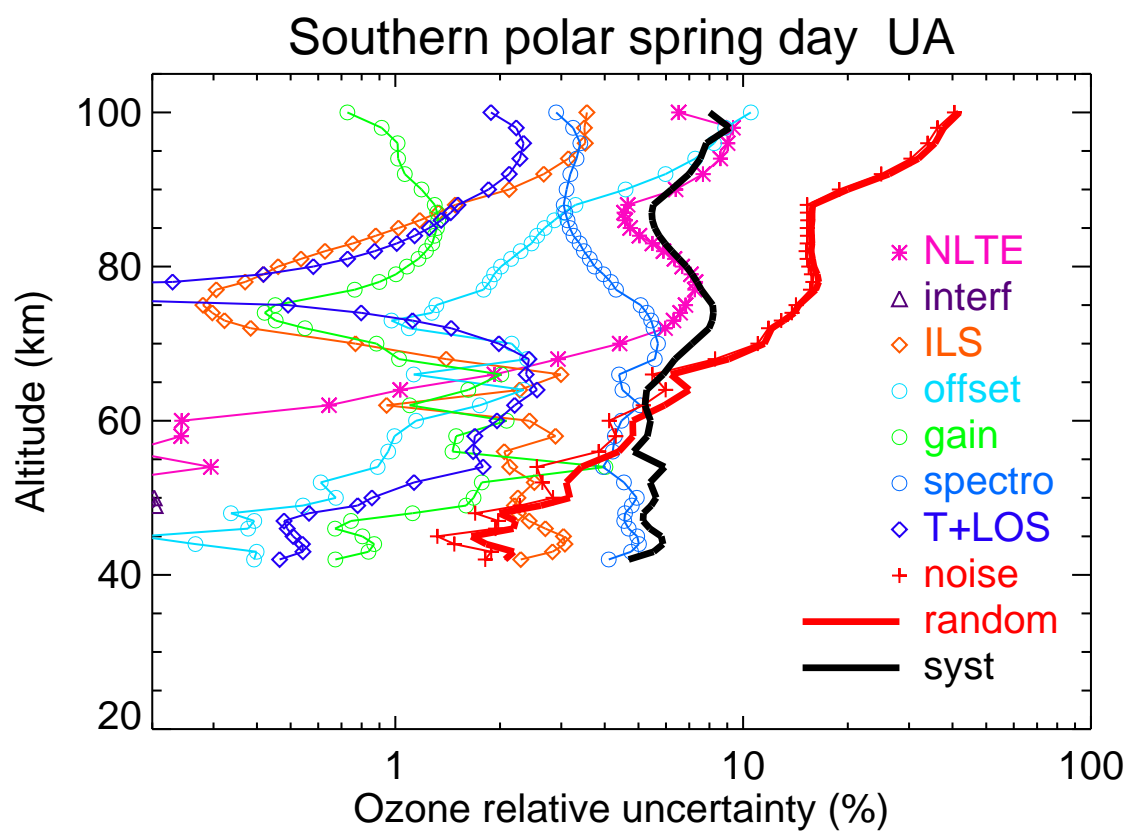

**Figure S63.** V8R\_O3\_661 Southern polar spring day.

**Table S66.** Ozone error budget for Southern polar spring night, UA. All uncertainties are  $1\sigma$ .

| altitude<br>(km) | mean O <sub>3</sub> vmr<br>(ppmv) | NLTE<br>(%) | interf<br>(%) | ILS<br>(%) | offset<br>(%) | gain<br>(%) | spectro<br>(%) | T+LOS<br>(%) | noise<br>(%) | random<br>(%) | syst<br>(%) |
|------------------|-----------------------------------|-------------|---------------|------------|---------------|-------------|----------------|--------------|--------------|---------------|-------------|
| 50               | 2.5                               | 0.1         | 0.2           | 2.3        | 0.7           | 1.7         | 5.4            | 0.8          | 3.0          | 3.5           | 5.9         |
| 60               | 1.4                               | 0.4         | <0.1          | 2.2        | 1.4           | 1.9         | 3.8            | 2.3          | 4.8          | 5.7           | 4.5         |
| 70               | 1.2                               | 4.8         | <0.1          | 0.8        | 3.0           | 1.6         | 3.8            | 5.2          | 10           | 12            | 5.8         |
| 80               | 0.3                               | 4.4         | <0.1          | 0.3        | 1.1           | 1.5         | 3.4            | 0.2          | 14           | 14            | 5.4         |
| 90               | 10                                | 6.7         | <0.1          | 0.8        | 1.6           | 1.6         | 2.9            | 2.7          | 10           | 11            | 7.0         |
| 96               | 12                                | 7.2         | <0.1          | 2.2        | 2.1           | 1.3         | 2.7            | 3.3          | 11           | 12            | 7.7         |
| 100              | 7.3                               | 6.3         | <0.1          | 3.6        | 4.5           | 1.1         | 2.6            | 3.1          | 21           | 21            | 7.2         |

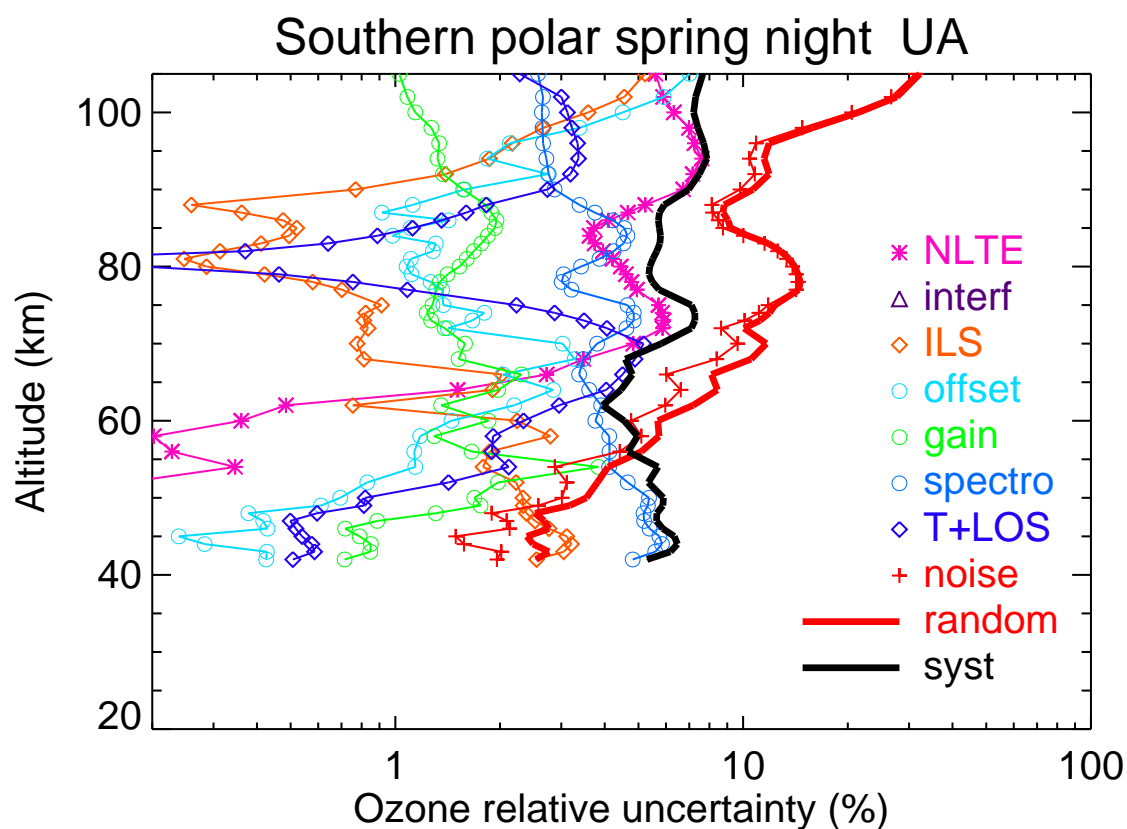

**Figure S64.** V8R\_O3\_661 Southern polar spring night.

**Table S67.** Ozone error budget for Southern polar summer day, UA. All uncertainties are  $1\sigma$ .

| altitude<br>(km) | mean O <sub>3</sub> vmr<br>(ppmv) | NLTE<br>(%) | interf<br>(%) | ILS<br>(%) | offset<br>(%) | gain<br>(%) | spectro<br>(%) | T+LOS<br>(%) | noise<br>(%) | random<br>(%) | syst<br>(%) |
|------------------|-----------------------------------|-------------|---------------|------------|---------------|-------------|----------------|--------------|--------------|---------------|-------------|
| 50               | 2.3                               | <0.1        | 0.2           | 2.1        | 0.6           | 2.0         | 4.3            | 0.8          | 2.5          | 2.8           | 5.2         |
| 60               | 1.0                               | 0.2         | <0.1          | 2.8        | 1.3           | 3.0         | 3.6            | 2.0          | 3.3          | 4.2           | 5.4         |
| 70               | 0.4                               | 3.2         | <0.1          | 1.5        | 2.8           | 1.4         | 5.4            | 2.0          | 9.1          | 10            | 6.3         |
| 80               | 0.1                               | 7.5         | <0.1          | 0.3        | 2.2           | 0.4         | 4.2            | 1.2          | 16           | 16            | 8.2         |
| 90               | 0.9                               | 8.1         | <0.1          | 2.0        | 3.7           | 1.4         | 3.2            | 3.5          | 15           | 17            | 6.7         |
| 96               | 0.6                               | 14          | <0.1          | 3.9        | 7.4           | 1.7         | 4.8            | 3.2          | 30           | 33            | 11          |

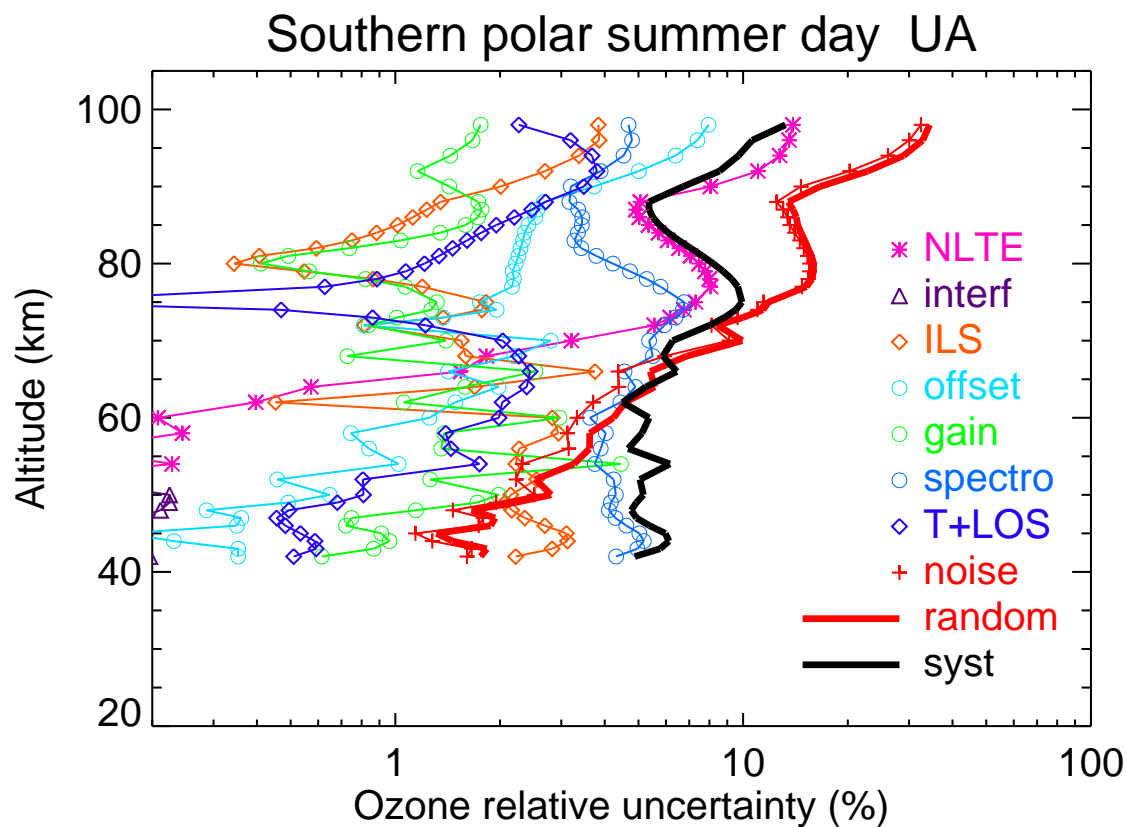

**Figure S65.** V8R\_O3\_661 Southern polar summer day.

**Table S68.** Ozone error budget for Southern polar summer night, UA. All uncertainties are  $1\sigma$ .

| altitude<br>(km) | mean O <sub>3</sub> vmr<br>(ppmv) | NLTE<br>(%) | interf<br>(%) | ILS<br>(%) | offset<br>(%) | gain<br>(%) | spectro<br>(%) | T+LOS<br>(%) | noise<br>(%) | random<br>(%) | syst<br>(%) |
|------------------|-----------------------------------|-------------|---------------|------------|---------------|-------------|----------------|--------------|--------------|---------------|-------------|
| 50               | 2.6                               | <0.1        | 0.2           | 2.1        | 0.7           | 1.9         | 5.0            | 0.8          | 2.9          | 3.2           | 5.7         |
| 60               | 1.4                               | 0.2         | <0.1          | 2.7        | 1.4           | 2.1         | 3.7            | 2.2          | 4.3          | 5.1           | 4.9         |
| 70               | 1.2                               | 3.7         | <0.1          | 0.8        | 3.0           | 1.2         | 3.7            | 4.2          | 8.6          | 10            | 5.1         |
| 80               | 0.1                               | 5.8         | <0.1          | 0.8        | 1.5           | 1.2         | 3.2            | 1.2          | 15           | 15            | 6.4         |
| 90               | 3.9                               | 5.6         | <0.1          | 1.8        | 1.9           | 1.3         | 3.2            | 2.7          | 12           | 13            | 6.2         |
| 96               | 6.2                               | 7.2         | <0.1          | 2.7        | 3.7           | 1.2         | 2.9            | 2.0          | 16           | 17            | 7.7         |
| 100              | 3.3                               | 6.6         | <0.1          | 3.9        | 6.6           | 1.2         | 3.2            | 1.5          | 28           | 29            | 7.5         |

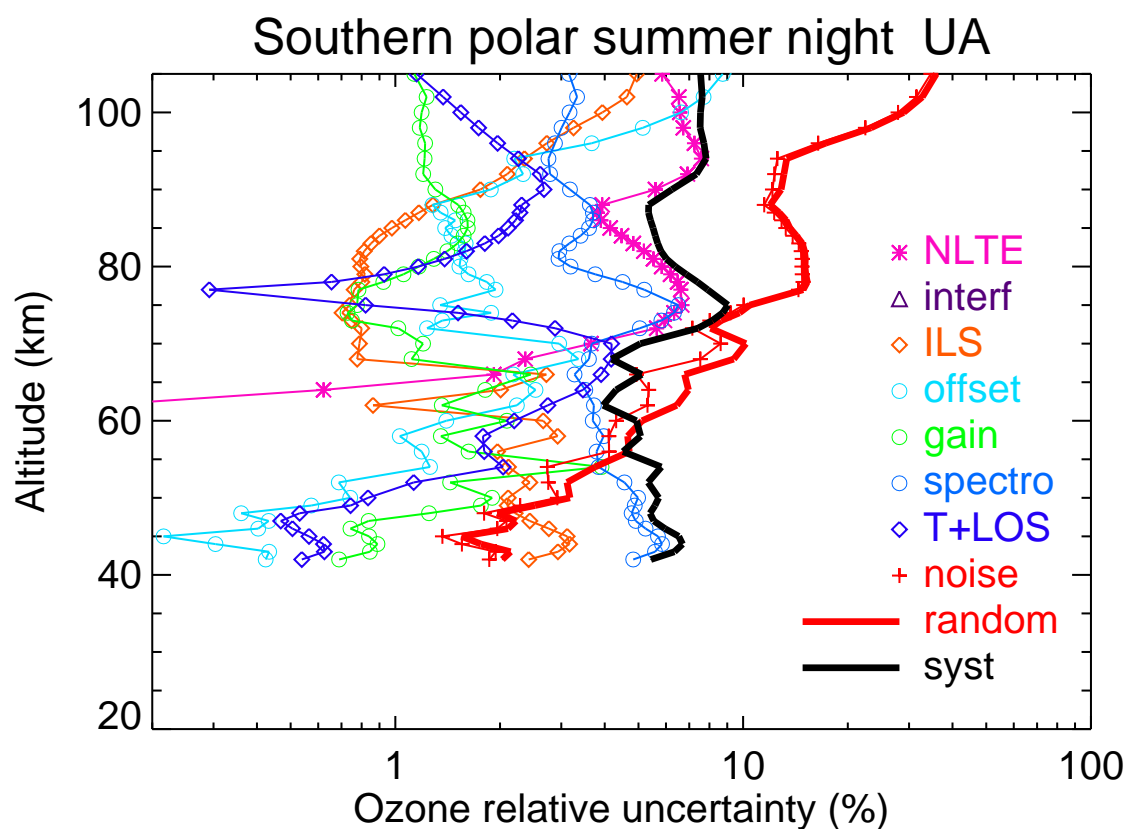

**Figure S66.** V8R\_O3\_661 Southern polar summer night.

**Table S69.** Ozone error budget for Southern polar autumn day, UA. All uncertainties are  $1\sigma$ .

| altitude<br>(km) | mean O <sub>3</sub> vmr<br>(ppmv) | NLTE<br>(%) | interf<br>(%) | ILS<br>(%) | offset<br>(%) | gain<br>(%) | spectro<br>(%) | T+LOS<br>(%) | noise<br>(%) | random<br>(%) | syst<br>(%) |
|------------------|-----------------------------------|-------------|---------------|------------|---------------|-------------|----------------|--------------|--------------|---------------|-------------|
| 50               | 2.3                               | 0.2         | 0.1           | 2.2        | 0.7           | 1.3         | 6.6            | 1.1          | 3.3          | 4.0           | 6.8         |
| 60               | 0.7                               | 0.9         | <0.1          | 2.2        | 1.5           | 1.7         | 5.1            | 2.1          | 6.3          | 7.0           | 5.7         |
| 70               | 0.2                               | 2.0         | <0.1          | 1.4        | 1.5           | 1.2         | 6.2            | 2.1          | 14           | 14            | 6.5         |
| 80               | 0.1                               | 3.7         | <0.1          | 0.7        | 3.2           | 1.0         | 3.9            | <0.1         | 18           | 18            | 5.2         |
| 90               | 1.0                               | 5.9         | <0.1          | 1.7        | 6.5           | 0.9         | 3.9            | 0.8          | 24           | 25            | 6.8         |
| 96               | 0.7                               | 7.4         | <0.1          | 2.3        | 10            | 0.8         | 4.2            | 1.1          | 37           | 39            | 7.8         |
| 100              | 0.8                               | 8.4         | <0.1          | 2.3        | 12            | 1.1         | 4.1            | 1.5          | 41           | 43            | 9.4         |

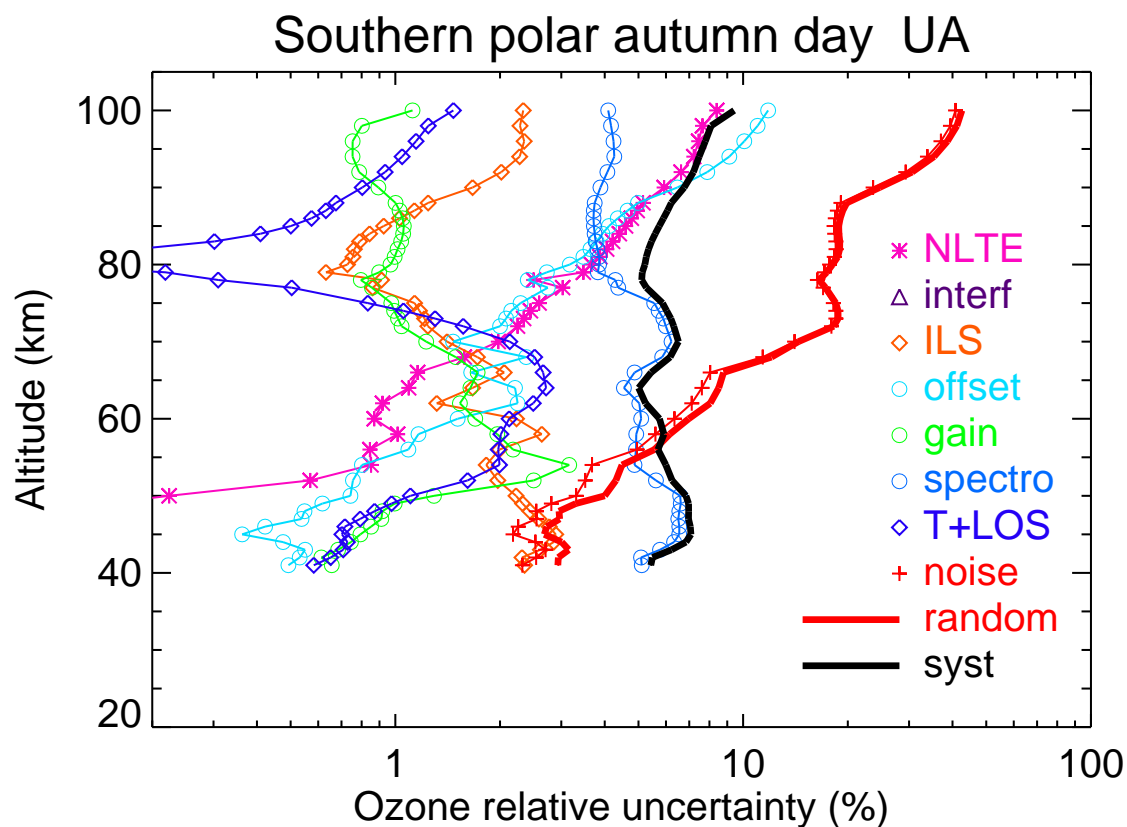

**Figure S67.** V8R\_O3\_661 Southern polar autumn day.

**Table S70.** Ozone error budget for Southern polar autumn night, UA. All uncertainties are  $1\sigma$ .

| altitude<br>(km) | mean O <sub>3</sub> vmr<br>(ppmv) | NLTE<br>(%) | interf<br>(%) | ILS<br>(%) | offset<br>(%) | gain<br>(%) | spectro<br>(%) | T+LOS<br>(%) | noise<br>(%) | random<br>(%) | syst<br>(%) |
|------------------|-----------------------------------|-------------|---------------|------------|---------------|-------------|----------------|--------------|--------------|---------------|-------------|
| 50               | 2.2                               | 0.4         | 0.2           | 2.0        | 0.9           | 1.4         | 6.7            | 1.1          | 3.8          | 4.2           | 7.1         |
| 60               | 1.3                               | 1.4         | <0.1          | 2.8        | 1.6           | 2.0         | 3.2            | 2.1          | 6.5          | 7.1           | 4.7         |
| 70               | 2.4                               | 2.2         | <0.1          | 0.7        | 2.9           | 2.0         | 4.2            | 5.5          | 7.1          | 10            | 3.9         |
| 80               | 0.8                               | 2.1         | <0.1          | 0.8        | 1.2           | 1.5         | 3.5            | 1.2          | 13           | 14            | 3.8         |
| 90               | 11                                | 4.7         | <0.1          | 0.8        | 2.2           | 1.4         | 3.2            | 0.7          | 12           | 12            | 5.5         |
| 96               | 12                                | 7.1         | <0.1          | 3.2        | 2.8           | 1.0         | 3.0            | 1.8          | 14           | 15            | 7.6         |
| 100              | 8.8                               | 5.9         | <0.1          | 4.7        | 5.3           | 0.9         | 3.2            | 2.1          | 24           | 25            | 7.6         |

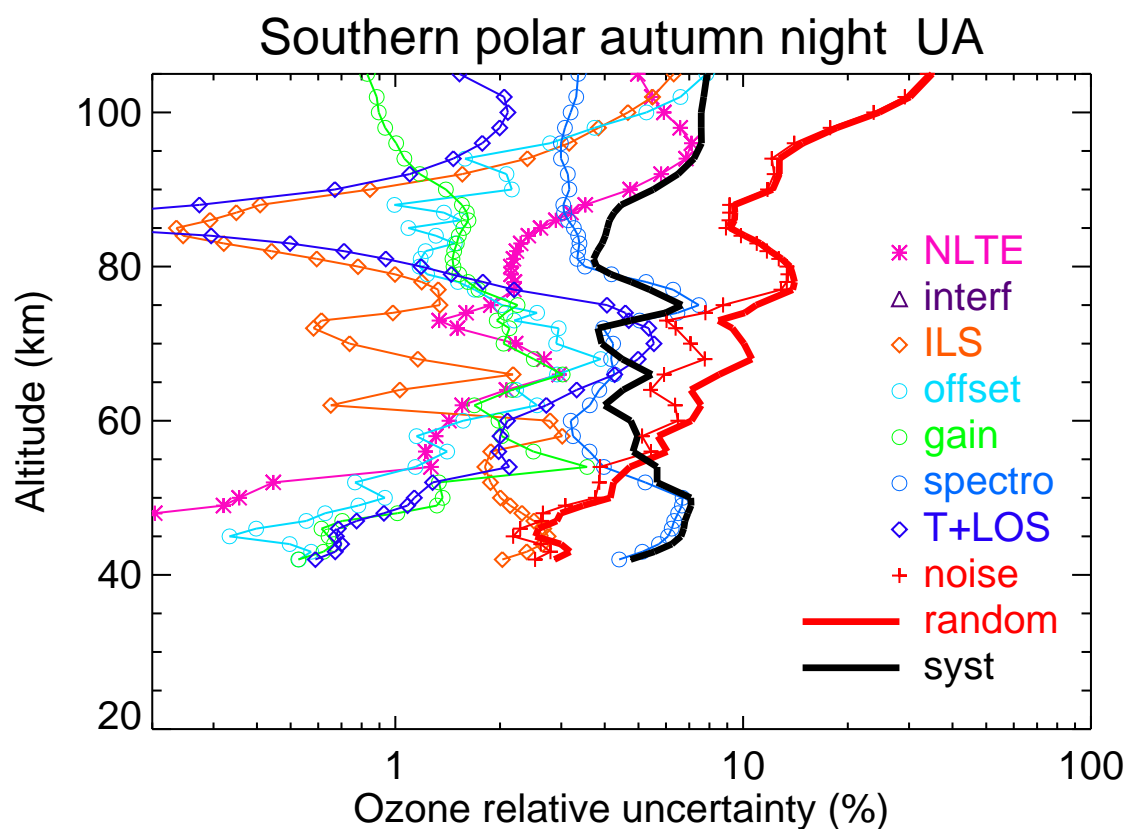

**Figure S68.** V8R\_O3\_661 Southern polar autumn night.
